# Supplementary material for: Age-dependent antibody profiles to plasmodium antigens are differentially associated with two artemisinin combination therapy outcomes in high transmission setting
Source: Front Med (Lausanne). 2022 Oct 13;9:991807. doi: 10.3389/fmed.2022.991807 (PMC9606348; doi:10.3389/fmed.2022.991807)
Supplement: Supplementary file 3 [file Table_2.xlsx]

## Sheet: Day 28
ID	p value	q value	Description
PF3D7_1023100_e1s6_428	1.72093e-05	0.0187065	dynein heavy chain, putative
PF3D7_0703700_e1s1_18	6.87907e-05	0.022592	conserved Plasmodium protein, unknown function
PF3D7_0719700_650	6.87907e-05	0.022592	40S ribosomal protein S10, putative
PF3D7_0808600_e1s2_447	8.50822e-05	0.022592	erythrocyte membrane protein 1, PfEMP1 (VAR)
PF3D7_1422600_197	0.000127679	0.022592	conserved Plasmodium protein, unknown function
PF3D7_1311800_e1s1_607	0.000127679	0.022592	M1-family alanyl aminopeptidase (M1AAP)
PF3D7_1252400_e4s3_128	0.000155069	0.022592	reticulocyte binding protein homologue 3, pseudogene (RH3)
PF3D7_1114900_e1s1_170	0.000182901	0.022592	conserved Plasmodium protein, unknown function
PF3D7_0727200_381	0.000187203	0.022592	cysteine desulfurase, putative (NFS)
PF3D7_1354200_456	0.000224906	0.022592	inositol-polyphosphate 5-phosphatase, putative
PF3D7_1444100_e7s1_426	0.000246977	0.022592	conserved Plasmodium protein, unknown function
PF3D7_0515600_e6s1_432	0.000268811	0.022592	conserved Plasmodium protein, unknown function
PF3D7_0616200_e1_671	0.000270189	0.022592	Ndc80 homologue, putative
PF3D7_1150400_DBL2bc2_1153	0.000330157	0.0256344	erythrocyte membrane protein 1, PfEMP1 (VAR)
PF3D7_1417200_e1s3_1019	0.00036467	0.0264264	NOT family protein, putative
PF3D7_0721100_171	0.000447046	0.0285475	conserved Plasmodium protein, unknown function
PF3D7_1009500_e3_631	0.000447046	0.0285475	metallopeptidase, putative
PF3D7_0723900_e1s2_415	0.000525253	0.0285475	conserved Plasmodium protein, unknown function
PF3D7_1249100_e2_549	0.000525253	0.0285475	conserved Plasmodium protein, unknown function
PF3D7_0802400_e1_853	0.000525253	0.0285475	conserved Plasmodium protein, unknown function
PF3D7_1302200_463	0.000614931	0.0290622	early transcribed membrane protein 13 (ETRAMP13)
PF3D7_0705000_e1s2_640	0.000614931	0.0290622	methyltransferase, putative
PF3D7_0917500_e1s1_733	0.000614931	0.0290622	conserved Plasmodium protein, unknown function
PF3D7_1435300_e1s1_1020	0.000672985	0.0299861	NAD(P)H-dependent glutamate synthase, putative
PF3D7_1012700_e1s1_168	0.000717239	0.0299861	protein phosphatase, putative
PF3D7_1023200_183	0.000717239	0.0299861	orotidine monophosphate decarboxylase (OMPDC)
PF3D7_0920700_429	0.000833821	0.0323701	conserved Plasmodium protein, unknown function
PF3D7_0933500_s1_754	0.000833821	0.0323701	conserved Plasmodium protein, unknown function
PF3D7_1032700_92	0.00111593	0.0386897	conserved Plasmodium protein, unknown function
PF3D7_1211200_e1s1_328	0.00111593	0.0386897	conserved Plasmodium protein, unknown function
PF3D7_0629700_e1s7_536	0.00111593	0.0386897	SET domain protein, putative (SET1)
PF3D7_1236100_e2s1_309	0.00113898	0.0386897	clustered-asparagine-rich protein
PF3D7_1013500_e1s1_554	0.00128505	0.040822	phosphoinositide-specific phospholipase C (PI-PLC)
PF3D7_1346900_840	0.00128505	0.040822	conserved Plasmodium protein, unknown function
PF3D7_0724700_e1s1_1006	0.00131442	0.040822	conserved Plasmodium protein, unknown function
PF3D7_0219600_e1s1_158	0.00147569	0.0411302	replication factor C subunit 1, putative
PF3D7_1408700_e2s1_232	0.00147569	0.0411302	conserved Plasmodium protein, unknown function
PF3D7_1470100_e1s1_530	0.00147569	0.0411302	conserved Plasmodium protein, unknown function
PF3D7_0826100_s7_718	0.00147569	0.0411302	E3 ubiquitin-protein ligase, putative
PF3D7_1445600_e4_188	0.00168984	0.0419286	erythrocyte membrane-like protein
PF3D7_1329600_560	0.00168984	0.0419286	conserved Plasmodium protein, unknown function
PF3D7_1216600_710	0.00168984	0.0419286	cell traversal protein for ookinetes and sporozoites (CelTOS)
PF3D7_0907200_e1s1_1022	0.00180256	0.0419286	GTPase activator, putative
PF3D7_1469600_e1s4_165	0.00193006	0.0419286	biotin carboxylase subunit of acetyl CoA carboxylase, putative (ACC1)
PF3D7_1017300.1._e2_382	0.00193006	0.0419286	NA
PF3D7_1206900_664	0.00193006	0.0419286	conserved Plasmodium protein, unknown function
PF3D7_0725100_e1s1_323	0.00199361	0.0419286	conserved Plasmodium membrane protein, unknown function
PF3D7_1241900_96	0.00219865	0.0419286	Tetratricopeptide repeat protein, putative
PF3D7_0803800_e2s1_143	0.00219865	0.0419286	20S proteasome beta subunit
PF3D7_1244500_218	0.00219865	0.0419286	conserved Plasmodium protein, unknown function
PF3D7_0509600_e2_283	0.00219865	0.0419286	asparagine-tRNA ligase, putative
PF3D7_1454200_s2_474	0.00219865	0.0419286	conserved Plasmodium protein, unknown function
PF3D7_0323600_e1_548	0.00219865	0.0419286	conserved Plasmodium protein, unknown function
PF3D7_1020200_e3s1_704	0.00219865	0.0419286	kinesin, putative
PF3D7_1014600_e1s4_736	0.00219865	0.0419286	transcriptional coactivator ADA2 (ADA2)
PF3D7_0806800_e1s1_801	0.00219865	0.0419286	vacuolar proton translocating ATPase subunit A, putative
PF3D7_0321600_e1_855	0.00219865	0.0419286	ATP-dependent RNA helicase, putative
PF3D7_0707800_e1s2_922	0.00243264	0.0424382	RAP protein, putative
PF3D7_1018300_e2s2_526	0.00249866	0.0424382	conserved Plasmodium protein, unknown function
PF3D7_0726400_e5s1_720	0.00249866	0.0424382	conserved Plasmodium membrane protein, unknown function
PF3D7_1129600_e1s2_731	0.00249866	0.0424382	phosphatidylinositol-4-phosphate-5-kinase, putative
PF3D7_0503900_e2_788	0.00249866	0.0424382	conserved Plasmodium protein, unknown function
PF3D7_1349500_e1s4_835	0.00249866	0.0424382	conserved Plasmodium protein, unknown function
PF3D7_0423400_839	0.00249866	0.0424382	asparagine-rich protein (AARP)
PF3D7_1035200_989	0.00281078	0.0434446	S-antigen
PF3D7_1448000_e2s1_127	0.00283267	0.0434446	U3 snoRNA-associated small subunit rRNA processing protein, putative
PF3D7_1229100_s1_187	0.00283267	0.0434446	ABC transporter, (CT family) (MRP2)
PF3D7_1208100_e3s1_444	0.00283267	0.0434446	conserved Plasmodium protein, unknown function
PF3D7_0207100_s1_464	0.00283267	0.0434446	conserved Plasmodium protein, unknown function
PF3D7_1472100_e1_558	0.00283267	0.0434446	Yip1 protein, putative
PF3D7_1133200_e1s2_132	0.0028385	0.0434446	conserved Plasmodium protein, unknown function
PF3D7_0520400_e1s1_134	0.00287765	0.0434446	conserved Plasmodium protein, unknown function
PF3D7_1116800_e4s1_155	0.00320413	0.0444895	heat shock protein 101 (HSP101)
PF3D7_1420200_166	0.00320413	0.0444895	tetratricopeptide repeat family protein, putative
PF3D7_1436400_e1s1_177	0.00320413	0.0444895	conserved Plasmodium protein, unknown function
PF3D7_1108900_482	0.00320413	0.0444895	conserved Plasmodium protein, unknown function
PF3D7_1324800_e1_492	0.00320413	0.0444895	dihydrofolate synthase/folylpolyglutamate synthase (DHFS-FPGS)
PF3D7_0318200_e1s3_1116	0.00325862	0.0444895	DNA-directed RNA polymerase II, putative
PF3D7_0422500_e1s1_1120	0.00326529	0.0444895	pre-mRNA-splicing helicase BRR2, putative (BRR2)
PF3D7_0506800_e1_1037	0.0032743	0.0444895	conserved Plasmodium protein, unknown function
PF3D7_0830600_e2_203	0.00361609	0.0457057	Plasmodium exported protein (PHISTc), unknown function
PF3D7_1464700_e1s1_222	0.00361609	0.0457057	ATP synthase (C/AC39) subunit, putative
PF3D7_1308200_e2s1_368	0.00361609	0.0457057	carbamoyl phosphate synthetase (cpsSII)
PF3D7_1010100_543	0.00361609	0.0457057	conserved Plasmodium protein, unknown function
PF3D7_1142700_571	0.00361609	0.0457057	conserved protein, unknown function
PF3D7_0522400_e4s1_833	0.00361609	0.0457057	conserved Plasmodium protein, unknown function
PF3D7_0711000_e1s1_1023	0.00371293	0.0462071	AAA family ATPase, CDC48 subfamily (Cdc48)
PF3D7_0812100_e1s1_162	0.00407236	0.0462071	conserved Plasmodium protein, unknown function
PF3D7_0930800_e2s2_167	0.00407236	0.0462071	conserved Plasmodium membrane protein, unknown function
PF3D7_1117500_282	0.00407236	0.0462071	tyrosine-tRNA ligase, putative
PF3D7_1469600_e1s3_467	0.00407236	0.0462071	biotin carboxylase subunit of acetyl CoA carboxylase, putative (ACC1)
PF3D7_1448000_e2s2_886	0.00424625	0.0462071	U3 snoRNA-associated small subunit rRNA processing protein, putative
PF3D7_1340900_e1_674	0.00432232	0.0462071	sodium-dependent phosphate transporter (PiT)
PF3D7_1036800_e5_779	0.0043628	0.0462071	acetyl-CoA transporter, putative
PF3D7_0521700_e1s1_1018	0.00440665	0.0462071	DEAD/DEAH box ATP-dependent RNA helicase, putative
PF3D7_0623400_769	0.00454423	0.0462071	RNA-binding protein mei2 homologue, putative
PF3D7_1441300_e5s1_156	0.00457643	0.0462071	serine/threonine protein kinase, putative
PF3D7_0205900_e2_175	0.00457643	0.0462071	proteasome 26S regulatory subunit, putative
PF3D7_1468900_284	0.00457643	0.0462071	conserved Plasmodium protein, unknown function
PF3D7_0827800_e1s3_287	0.00457643	0.0462071	SET domain protein, putative (SET3)
PF3D7_1252400_e4s1_417	0.00457643	0.0462071	reticulocyte binding protein homologue 3, pseudogene (RH3)
PF3D7_1414600_e1s1_433	0.00457643	0.0462071	RNA guanylyltransferase (Pgt1)
PF3D7_0203100_e1s1_434	0.00457643	0.0462071	protein kinase, putative
PF3D7_1208900_s1_475	0.00457643	0.0462071	conserved Plasmodium protein, unknown function
PF3D7_1435500_479	0.00457643	0.0462071	conserved Plasmodium protein, unknown function
PF3D7_1008000_s3_545	0.00457643	0.0462071	histone deacetylase, putative
PF3D7_1338300_e2s1_723	0.00457643	0.0462071	elongation factor 1-gamma, putative
PF3D7_0622800_s2_763	0.00459096	0.0462071	leucyl tRNA synthase
PF3D7_1329000_e2s1_1089	0.00484343	0.048301	DNA-directed RNA polymerase 3 largest subunit
PF3D7_1138400_e1s1_250	0.00508402	0.0489404	guanylyl cyclase (GCalpha)
PF3D7_1233400_e1_1051	0.00509164	0.0489404	conserved Plasmodium membrane protein, unknown function
PF3D7_1247100_e1_262	0.00513266	0.0489404	conserved Plasmodium protein, unknown function
PF3D7_1023100_e1s2_542	0.00513266	0.0489404	dynein heavy chain, putative
PF3D7_0910700_859	0.00513266	0.0489404	actin-like protein, putative
PF3D7_0313100_e1_790	0.00522552	0.0491713	ubiquitin-protein ligase, putative (HRD3)
PF3D7_0731500_e1s1_185	0.00524735	0.0491713	erythrocyte binding antigen-175 (EBA175)
PF3D7_1146800_e2_220	0.0057449	0.0511861	conserved Plasmodium protein, unknown function
PF3D7_1411600_383	0.0057449	0.0511861	GTP binding protein, putative
PF3D7_0214100_e1s2_465	0.0057449	0.0511861	protein transport protein sec31 (SEC31)
PF3D7_1207400_e2_561	0.0057449	0.0511861	conserved Plasmodium protein, unknown function
PF3D7_0307700_e3s2_716	0.0057449	0.0511861	conserved Plasmodium protein, unknown function
PF3D7_0724800_e1_838	0.0057449	0.0511861	kelch protein, putative
PF3D7_1014600_e1s2_45	0.00641797	0.0516766	transcriptional coactivator ADA2 (ADA2)
PF3D7_1036900_e1s2_130	0.00641797	0.0516766	conserved Plasmodium protein, unknown function
PF3D7_1434500_e2s3_139	0.00641797	0.0516766	dynein-related AAA-type ATPase, putative
PF3D7_1242600_e1_202	0.00641797	0.0516766	protein geranylgeranyltransferase type II, alpha subunit, putative
PF3D7_1021700_e2s1_237	0.00641797	0.0516766	conserved Plasmodium membrane protein, unknown function
PF3D7_1339600_e1s1_435	0.00641797	0.0516766	conserved Plasmodium protein, unknown function
PF3D7_1138400_e1s2_459	0.00641797	0.0516766	guanylyl cyclase (GCalpha)
PF3D7_1252400_e2s1_504	0.00641797	0.0516766	reticulocyte binding protein homologue 3, pseudogene (RH3)
PF3D7_0203900_563	0.00641797	0.0516766	5'-3' exonuclease, N-terminal resolvase-like domain, putative
PF3D7_0410300_e1_569	0.00641797	0.0516766	protein phosphatase, putative
PF3D7_1031400.1_e8_577	0.00641797	0.0516766	OTU-like cysteine protease, putative
PF3D7_0425400_e2_681	0.00641797	0.0516766	Plasmodium exported protein (PHISTa), unknown function
PF3D7_0215600_850	0.00641797	0.0516766	conserved Plasmodium protein, unknown function
PF3D7_0801000_e2s2_897	0.00683057	0.0543978	Plasmodium exported protein (PHISTc), unknown function
PF3D7_1346400_e1s1_349	0.00693628	0.0543978	conserved Plasmodium protein, unknown function
PF3D7_1408700_e2s2_1106	0.00706367	0.0543978	conserved Plasmodium protein, unknown function
PF3D7_1471400_e2s1_136	0.00715629	0.0543978	diacylglycerol kinase, putative
PF3D7_1337500_e1s1_159	0.00715629	0.0543978	conserved Plasmodium protein, unknown function
PF3D7_1018100_263	0.00715629	0.0543978	conserved Plasmodium protein, unknown function
PF3D7_0307300_281	0.00715629	0.0543978	EB1 homolog, putative
PF3D7_1136300_e2s1_457	0.00715629	0.0543978	tudor staphylococcal nuclease (TSN)
PF3D7_1118600_1121	0.00769195	0.0579653	histone acetyltransferase, putative (MYST)
PF3D7_1013600_s2_1054	0.00787884	0.0579653	conserved Plasmodium protein, unknown function
PF3D7_1211000_e3s1_164	0.00796511	0.0579653	kinesin-like protein, putative
PF3D7_0905300_s6_173	0.00796511	0.0579653	dynein heavy chain, putative
PF3D7_1004200_e1s1_521	0.00796511	0.0579653	conserved Plasmodium membrane protein, unknown function
PF3D7_1008600_842	0.00796511	0.0579653	zinc finger C-x8-C-x5-C-x3-H type, putative
PF3D7_1245600_e1s2_437	0.00799889	0.0579653	kinesin, putative
PF3D7_0527200_e2s1_30	0.0088493	0.0601199	ubiquitin carboxyl-terminal hydrolase, putative
PF3D7_0719400_s1_174	0.0088493	0.0601199	conserved Plasmodium protein, unknown function
PF3D7_1319900_s2_180	0.0088493	0.0601199	conserved Plasmodium protein, unknown function
PF3D7_0920300_e1_182	0.0088493	0.0601199	conserved Plasmodium protein, unknown function
PF3D7_0601100_e2_269	0.0088493	0.0601199	Plasmodium exported protein (hyp4), unknown function
PF3D7_1143600_271	0.0088493	0.0601199	conserved Plasmodium protein, unknown function
PF3D7_0522400_e3s3_452	0.0088493	0.0601199	conserved Plasmodium protein, unknown function
PF3D7_1356300_e2_477	0.0088493	0.0601199	ubiquitin conjugating enzyme, putative
PF3D7_1141900_481	0.0088493	0.0601199	inner membrane complex protein 1b, putative (IMC1b)
PF3D7_0715800_773	0.0088493	0.0601199	drug/metabolite exporter, drug/metabolite transporter
PF3D7_1140100_e2_1055	0.00896887	0.0605538	vacuolar ATP synthase subunit f, putative
PF3D7_0812100_e1s2_448	0.00923122	0.0619404	conserved Plasmodium protein, unknown function
PF3D7_0313800_e5_87	0.00981476	0.0629172	conserved Plasmodium protein, unknown function
PF3D7_0310200_e1s4_157	0.00981476	0.0629172	phd finger protein, putative
PF3D7_1252700_e2_473	0.00981476	0.0629172	Plasmodium exported protein (PHISTb), unknown function
PF3D7_1208200_e3s2_539	0.00981476	0.0629172	cysteine repeat modular protein 3 (CRMP3)
PF3D7_1023900_s1_546	0.00981476	0.0629172	chromodomain-helicase-DNA-binding protein 1 homolog, putative (CHD1)
PF3D7_1310700_e1s1_702	0.00981476	0.0629172	conserved Plasmodium protein, unknown function
PF3D7_1402300_797	0.00981476	0.0629172	26S proteasome regulatory subunit (RPN6)
PF3D7_1244600_e1s1_992	0.00988901	0.0629172	ADP-ribosylation factor GTPase-activating protein, putative
PF3D7_1030200_1070	0.00997423	0.0629172	conserved Plasmodium protein, unknown function
PF3D7_1222400_e1s2_1117	0.00997423	0.0629172	transcription factor with AP2 domain(s) (ApiAP2)
PF3D7_0402200_e1s1_902	0.0100714	0.0629172	surface-associated interspersed gene 4.1, pseudogene (SURFIN4.1) (SURF4.1)
PF3D7_0308000_1140	0.0100714	0.0629172	DNA polymerase epsilon subunit b, putative
PF3D7_0301700_e2s1_307	0.0101767	0.0632118	Plasmodium exported protein, unknown function
PF3D7_1014600_e1s3_161	0.0108668	0.0652606	transcriptional coactivator ADA2 (ADA2)
PF3D7_1315300_e2_379	0.0108668	0.0652606	conserved Plasmodium protein, unknown function
PF3D7_0625800_384	0.0108668	0.0652606	conserved Plasmodium protein, unknown function
PF3D7_1335900_390	0.0108668	0.0652606	sporozoite surface protein 2 (TRAP)
PF3D7_1233600_e1s3_451	0.0108668	0.0652606	asparagine and aspartate rich protein 1 (AARP1)
PF3D7_0804500_e2s2_757	0.0108668	0.0652606	conserved Plasmodium membrane protein, unknown function
PF3D7_1410100_e1_79	0.0118354	0.0664642	alpha/beta hydrolase, putative
PF3D7_1468100_e2s1_58	0.0120117	0.0664642	conserved Plasmodium protein, unknown function
PF3D7_1343600_e2_178	0.0120117	0.0664642	UDP-N-acetylglucosamine pyrophosphorylase, putative
PF3D7_0511200_e1_266	0.0120117	0.0664642	stearoyl-CoA delta 9 desaturase, putative
PF3D7_0824600_e1_270	0.0120117	0.0664642	anamorsin related protein, putative
PF3D7_1001800_e2_398	0.0120117	0.0664642	Plasmodium exported protein (PHISTc), unknown function
PF3D7_1329000_e1s2_420	0.0120117	0.0664642	DNA-directed RNA polymerase 3 largest subunit
PF3D7_1350100_e2s1_423	0.0120117	0.0664642	lysine-tRNA ligase, putative
PF3D7_0303200_e2s2_443	0.0120117	0.0664642	HAD superfamily protein, putative
PF3D7_0310300_e1s1_608	0.0120117	0.0664642	phosphoglycerate mutase, putative
PF3D7_1443400_e2_751	0.0120117	0.0664642	conserved Plasmodium protein, unknown function
PF3D7_1201700_e2_765	0.0120117	0.0664642	conserved Plasmodium membrane protein, unknown function
PF3D7_0915400_e1s1_807	0.0120117	0.0664642	6-phosphofructokinase (PFK9)
PF3D7_1350900_832	0.0120117	0.0664642	transcription factor with AP2 domain(s) (ApiAP2)
PF3D7_0812700_847	0.0120117	0.0664642	RNA-binding protein (U1 snRNP-like), putative
PF3D7_1221900_106	0.0120455	0.0664642	conserved Plasmodium membrane protein, unknown function
PF3D7_0717700_e1s1_1090	0.0126111	0.0692336	seryl-tRNA synthetase, putative
PF3D7_1022200_e2s1_142	0.0132554	0.0713299	conserved Plasmodium membrane protein, unknown function
PF3D7_1475400_e3s4_255	0.0132554	0.0713299	cysteine repeat modular protein 4 (CRMP4)
PF3D7_1444100_e6s1_732	0.0132554	0.0713299	conserved Plasmodium protein, unknown function
PF3D7_1302200_768	0.0132554	0.0713299	early transcribed membrane protein 13 (ETRAMP13)
PF3D7_1118200_e1s1_1119	0.0137813	0.0737946	heat shock protein 90, putative
PF3D7_0402000_e1_1056	0.0140655	0.073839	Plasmodium exported protein (PHISTa), unknown function
PF3D7_0804900_192	0.0146048	0.073839	GTPase activator, putative
PF3D7_1322000_e1_209	0.0146048	0.073839	adenosine-diphosphatase, putative
PF3D7_1020700_e1s2_226	0.0146048	0.073839	ribosomal processing ATPase, putative
PF3D7_1433500_e1s1_322	0.0146048	0.073839	DNA topoisomerase II, putative
PF3D7_0709900_e2_340	0.0146048	0.073839	conserved Plasmodium membrane protein, unknown function
PF3D7_1110400_e3s1_517	0.0146048	0.073839	asparagine-rich antigen
PF3D7_1252400_e4s2_706	0.0146048	0.073839	reticulocyte binding protein homologue 3, pseudogene (RH3)
PF3D7_1021900_e1s2_715	0.0146048	0.073839	conserved Plasmodium protein (10b antigen), unknown function
PF3D7_0104800_783	0.0146048	0.073839	novel putative transporter 1 (NPT1)
PF3D7_0113800_e2_789	0.0146048	0.073839	DBL containing protein, unknown function
PF3D7_1132400_e2s2_836	0.0146048	0.073839	conserved Plasmodium membrane protein, unknown function
PF3D7_0412000_98	0.0150117	0.0755451	conserved Plasmodium protein, unknown function
PF3D7_1459000_675	0.0156456	0.0783133	ATP-dependent RNA helicase DBP5 (DBP5)
PF3D7_0629700_e1s3_348	0.0160661	0.0783133	SET domain protein, putative (SET1)
PF3D7_1300300_e1s2_421	0.0160661	0.0783133	erythrocyte membrane protein 1, PfEMP1 (VAR)
PF3D7_0318900_e3_490	0.0160661	0.0783133	conserved protein, unknown function
PF3D7_0726400_e6s1_520	0.0160661	0.0783133	conserved Plasmodium membrane protein, unknown function
PF3D7_0728900_e1_562	0.0160661	0.0783133	RNA binding protein, putative
PF3D7_0409300_e1_866	0.0160661	0.0783133	conserved Plasmodium protein, unknown function
PF3D7_0926400_e2_193	0.0167235	0.0811538	monocarboxylate transporter, putative
PF3D7_0905300_s5_1038	0.0173909	0.0823271	dynein heavy chain, putative
PF3D7_0628200_s2_73	0.0176469	0.0823271	protein kinase PK4 (PK4)
PF3D7_1341800_82	0.0176469	0.0823271	conserved Plasmodium protein, unknown function
PF3D7_0708000_e1s1_239	0.0176469	0.0823271	cytoskeleton associated protein, putative
PF3D7_0318200_e1s1_242	0.0176469	0.0823271	DNA-directed RNA polymerase II, putative
PF3D7_1142800_254	0.0176469	0.0823271	conserved Plasmodium protein, unknown function
PF3D7_1004100_e8_267	0.0176469	0.0823271	hypothetical protein
PF3D7_1115700_e1s1_422	0.0176469	0.0823271	cysteine proteinase falcipain 2a
PF3D7_1217200_e1s1_513	0.0176469	0.0823271	snoRNA-associated small subunit rRNA processing protein, putative
PF3D7_0724700_e2s2_146	0.0183	0.0850092	conserved Plasmodium protein, unknown function
PF3D7_1212700_s1_56	0.0187784	0.0868599	eukaryotic translation initiation factor 3 subunit 10, putative
PF3D7_0507700_e1s1_135	0.0190357	0.0869327	nuclear protein localization protein 4, putative (NPL4)
PF3D7_1314200_e1s3_449	0.0193539	0.0869327	telomerase reverse transcriptase, putative (TERT)
PF3D7_1222600_e1s1_538	0.0193539	0.0869327	transcription factor with AP2 domain(s) (ApiAP2)
PF3D7_0209800_e2_555	0.0193539	0.0869327	ATP-dependent RNA helicase UAP56 (UAP56)
PF3D7_1406300_771	0.0193539	0.0869327	glycerophodiester phosphodiesterase, putative
PF3D7_1139500.1_e1s1_800	0.0193539	0.0869327	AAA family ATPase, putative
PF3D7_0310500_e1s2_809	0.0193539	0.0869327	DEAD box helicase, putative
PF3D7_1202600_e2s1_1132	0.0195467	0.0872221	conserved protein, unknown function
PF3D7_1452000_s2_353	0.0195788	0.0872221	rhoptry neck protein 2 (RON2)
PF3D7_1140800_676	0.019697	0.0873904	conserved Plasmodium protein, unknown function
PF3D7_1023100_e1s4_40	0.021195	0.0895376	dynein heavy chain, putative
PF3D7_0520200_97	0.021195	0.0895376	conserved Plasmodium protein, unknown function
PF3D7_0622800_s1_176	0.021195	0.0895376	leucyl tRNA synthase
PF3D7_1419400_e1s1_229	0.021195	0.0895376	conserved Plasmodium membrane protein, unknown function
PF3D7_0728000_e2_260	0.021195	0.0895376	eukaryotic translation initiation factor 2 alpha subunit, putative
PF3D7_1417200_e1s4_616	0.021195	0.0895376	NOT family protein, putative
PF3D7_1022000_e2_632	0.021195	0.0895376	RNA binding protein, putative
PF3D7_1346400_e1s4_638	0.021195	0.0895376	conserved Plasmodium protein, unknown function
PF3D7_1475400_e3s3_749	0.021195	0.0895376	cysteine repeat modular protein 4 (CRMP4)
PF3D7_1323500_777	0.021195	0.0895376	plasmepsin V (PMV)
PF3D7_1208100_e3s2_804	0.021195	0.0895376	conserved Plasmodium protein, unknown function
PF3D7_1247500_858	0.021195	0.0895376	serine/threonine protein kinase, putative
PF3D7_0420000_s3_1124	0.0213342	0.0895376	zinc finger protein, putative
PF3D7_0924700_1141	0.0213342	0.0895376	splicing factor 3A subunit 3, putative (SF3A3)
PF3D7_0317700_e1s1_1110	0.0222245	0.0929156	CPSF (cleavage and polyadenylation specific factor), subunit A, putative
PF3D7_0804800_e1s1_1003	0.0227778	0.0936584	peptidyl-prolyl cis-trans isomerase (CYP24)
PF3D7_1215100_e1s1_1026	0.0230442	0.0936584	conserved Plasmodium protein, unknown function
PF3D7_1005500_e2s2_228	0.0231776	0.0936584	regulator of nonsense transcripts, putative
PF3D7_0726400_e6s2_231	0.0231776	0.0936584	conserved Plasmodium membrane protein, unknown function
PF3D7_0709900_e1s2_476	0.0231776	0.0936584	conserved Plasmodium membrane protein, unknown function
PF3D7_0110000_653	0.0231776	0.0936584	conserved Plasmodium protein, unknown function
PF3D7_0220700_e2_689	0.0231776	0.0936584	Plasmodium exported protein (hyp9), unknown function
PF3D7_1325900_e1s1_709	0.0231776	0.0936584	conserved Plasmodium protein, unknown function
PF3D7_0826500_e1s1_813	0.0231776	0.0936584	ubiquitination-mediated degradation component, putative
PF3D7_1440500_e1s1_445	0.0242339	0.0975639	allantoicase, putative
PF3D7_1203500_1148	0.0252665	0.0993214	conserved Plasmodium protein, unknown function
PF3D7_1470100_e1s2_241	0.02531	0.0993214	conserved Plasmodium protein, unknown function
PF3D7_0424800_e2_656	0.02531	0.0993214	Plasmodium exported protein (PHISTb), unknown function
PF3D7_0826300_667	0.02531	0.0993214	SPRY domain, putative
PF3D7_1364200_e1s1_737	0.02531	0.0993214	conserved Plasmodium protein, unknown function
PF3D7_0826100_s2_825	0.02531	0.0993214	E3 ubiquitin-protein ligase, putative
PF3D7_0214100_e1s1_843	0.02531	0.0993214	protein transport protein sec31 (SEC31)

## Sheet: Day 42
ID	p value	q value	Description
PF3D7_0900200_e2s1_19	5.1148e-06	0.00555979	rifin (RIF)
PF3D7_0703700_e1s1_18	1.34388e-05	0.00730399	conserved Plasmodium protein, unknown function
PF3D7_1411600_383	0.000163115	0.0526146	GTP binding protein, putative
PF3D7_0727200_381	0.000235396	0.0526146	cysteine desulfurase, putative (NFS)
PF3D7_1236100_e2s1_309	0.000261506	0.0526146	clustered-asparagine-rich protein
PF3D7_1009500_e3_631	0.000290421	0.0526146	metallopeptidase, putative
PF3D7_1422600_197	0.000436981	0.067857	conserved Plasmodium protein, unknown function
PF3D7_1138400_e1s2_459	0.000533019	0.0724239	guanylyl cyclase (GCalpha)
PF3D7_0108300_s1_65	0.000689093	0.0832271	conserved Plasmodium protein, unknown function
PF3D7_0719700_650	0.000862199	0.093721	40S ribosomal protein S10, putative
