# Supplementary material for: Age-dependent antibody profiles to plasmodium antigens are differentially associated with two artemisinin combination therapy outcomes in high transmission setting
Source: Front Med (Lausanne). 2022 Oct 13;9:991807. doi: 10.3389/fmed.2022.991807 (PMC9606348; doi:10.3389/fmed.2022.991807)
Supplement: Supplementary file 4 [file Table_3.xlsx]

## Sheet: Day28_ASMQ
	Overall	Ann
PF3D7_0515600_e6s1_432	100	conserved Plasmodium protein, unknown function
PF3D7_1150400_DBL2bc2_1153	94.2343	erythrocyte membrane protein 1, PfEMP1 (VAR)
PF3D7_0422500_e1s1_1120	78.3957	pre-mRNA-splicing helicase BRR2, putative (BRR2)
PF3D7_1114900_e1s1_170	76.3643	conserved Plasmodium protein, unknown function
PF3D7_1422600_197	70.8191	conserved Plasmodium protein, unknown function
PF3D7_0703700_e1s1_18	69.7283	conserved Plasmodium protein, unknown function
PF3D7_0318200_e1s3_1116	68.543	DNA-directed RNA polymerase II, putative
PF3D7_0900200_e2s1_19	66.8916	rifin (RIF)
PF3D7_1311800_e1s1_607	54.0597	M1-family alanyl aminopeptidase (M1AAP)
PF3D7_1302200_463	52.7541	early transcribed membrane protein 13 (ETRAMP13)
PF3D7_0423400_839	51.8087	asparagine-rich protein (AARP)
PF3D7_0719700_650	51.4508	40S ribosomal protein S10, putative
PF3D7_1036800_e5_779	50.0033	acetyl-CoA transporter, putative
PF3D7_1354200_456	49.5554	inositol-polyphosphate 5-phosphatase, putative
PF3D7_1249100_e2_549	49.2039	conserved Plasmodium protein, unknown function
PF3D7_1252400_e4s3_128	48.2073	reticulocyte binding protein homologue 3, pseudogene (RH3)
PF3D7_0933500_s1_754	47.3869	conserved Plasmodium protein, unknown function
PF3D7_1211200_e1s1_328	47.0099	conserved Plasmodium protein, unknown function
PF3D7_1448000_e2s2_886	45.4688	U3 snoRNA-associated small subunit rRNA processing protein, putative
PF3D7_1009500_e3_631	45.3249	metallopeptidase, putative
PF3D7_0808600_e1s2_447	44.2799	erythrocyte membrane protein 1, PfEMP1 (VAR)
PF3D7_0323600_e1_548	44.0241	conserved Plasmodium protein, unknown function
PF3D7_0917500_e1s1_733	42.9826	conserved Plasmodium protein, unknown function
PF3D7_0723900_e1s2_415	42.0361	conserved Plasmodium protein, unknown function
PF3D7_0724800_e1_838	40.0814	kelch protein, putative
PF3D7_0907200_e1s1_1022	39.3631	GTPase activator, putative
PF3D7_0521700_e1s1_1018	38.4483	DEAD/DEAH box ATP-dependent RNA helicase, putative
PF3D7_0725100_e1s1_323	37.2199	conserved Plasmodium membrane protein, unknown function
PF3D7_1346900_840	37.1007	conserved Plasmodium protein, unknown function
PF3D7_1236100_e2s1_309	37.063	clustered-asparagine-rich protein
PF3D7_0727200_381	36.5296	cysteine desulfurase, putative (NFS)
PF3D7_1349500_e1s4_835	35.4875	conserved Plasmodium protein, unknown function
PF3D7_1470100_e1s1_530	35.4702	conserved Plasmodium protein, unknown function
PF3D7_1004100_e8_267	35.1627	hypothetical protein
PF3D7_0726400_e5s1_720	35.1203	conserved Plasmodium membrane protein, unknown function
PF3D7_1464700_e1s1_222	34.3413	ATP synthase (C/AC39) subunit, putative
PF3D7_0802400_e1_853	33.2866	conserved Plasmodium protein, unknown function
PF3D7_1013500_e1s1_554	33.1734	phosphoinositide-specific phospholipase C (PI-PLC)
PF3D7_0203900_563	32.8276	5'-3' exonuclease, N-terminal resolvase-like domain, putative
PF3D7_0705000_e1s2_640	32.2157	methyltransferase, putative
PF3D7_1241900_96	31.8025	Tetratricopeptide repeat protein, putative
PF3D7_1138400_e1s2_459	31.1642	guanylyl cyclase (GCalpha)
PF3D7_1417200_e1s3_1019	30.7696	NOT family protein, putative
PF3D7_1013600_s2_1054	30.1838	conserved Plasmodium protein, unknown function
PF3D7_1138400_e1s1_250	29.7702	guanylyl cyclase (GCalpha)
PF3D7_0920700_429	29.759	conserved Plasmodium protein, unknown function
PF3D7_1329600_560	29.1031	conserved Plasmodium protein, unknown function
PF3D7_0303200_e2s2_443	28.5831	HAD superfamily protein, putative
PF3D7_1435300_e1s1_1020	28.5799	NAD(P)H-dependent glutamate synthase, putative
PF3D7_1319400_e1s2_149	28.3904	conserved Plasmodium protein, unknown function
PF3D7_0422500_e1s2_831	28.3312	pre-mRNA-splicing helicase BRR2, putative (BRR2)
PF3D7_1032700_92	28.0598	conserved Plasmodium protein, unknown function
PF3D7_1324800_e1_492	27.9349	dihydrofolate synthase/folylpolyglutamate synthase (DHFS-FPGS)
PF3D7_1018100_263	27.1245	conserved Plasmodium protein, unknown function
PF3D7_1222400_e1s2_1117	27.093	transcription factor with AP2 domain(s) (ApiAP2)
PF3D7_0207100_s1_464	26.9886	conserved Plasmodium protein, unknown function
PF3D7_1023100_e1s6_428	25.0642	dynein heavy chain, putative
PF3D7_1252400_e4s1_417	25.0184	reticulocyte binding protein homologue 3, pseudogene (RH3)
PF3D7_1420200_166	24.7072	tetratricopeptide repeat family protein, putative
PF3D7_0826100_s7_718	24.6679	E3 ubiquitin-protein ligase, putative
PF3D7_0616200_e1_671	24.4029	Ndc80 homologue, putative
PF3D7_1014600_e1s2_45	24.2731	transcriptional coactivator ADA2 (ADA2)
PF3D7_0503900_e2_788	24.2587	conserved Plasmodium protein, unknown function
PF3D7_0721100_171	23.8627	conserved Plasmodium protein, unknown function
PF3D7_1216600_710	23.6122	cell traversal protein for ookinetes and sporozoites (CelTOS)
PF3D7_0321600_e1_855	23.0174	ATP-dependent RNA helicase, putative
PF3D7_1023900_s1_546	22.8462	chromodomain-helicase-DNA-binding protein 1 homolog, putative (CHD1)
PF3D7_1244500_218	22.3234	conserved Plasmodium protein, unknown function
PF3D7_1008000_s3_545	21.6009	histone deacetylase, putative
PF3D7_1319100_1143	21.5253	conserved protein, unknown function
PF3D7_0830600_e2_203	21.382	Plasmodium exported protein (PHISTc), unknown function
PF3D7_1208900_s1_475	21.0275	conserved Plasmodium protein, unknown function
PF3D7_1436400_e1s1_177	20.8031	conserved Plasmodium protein, unknown function
PF3D7_0924700_1141	20.8009	splicing factor 3A subunit 3, putative (SF3A3)
PF3D7_1445600_e4_188	20.5512	erythrocyte membrane-like protein
PF3D7_0301700_e2s1_307	20.233	Plasmodium exported protein, unknown function
PF3D7_0715800_773	20.1834	drug/metabolite exporter, drug/metabolite transporter
PF3D7_0520400_e1s1_134	20.117	conserved Plasmodium protein, unknown function
PF3D7_0926400_e2_193	19.5224	monocarboxylate transporter, putative
PF3D7_0629700_e1s7_536	19.4158	SET domain protein, putative (SET1)
PF3D7_1010100_543	19.2341	conserved Plasmodium protein, unknown function
PF3D7_0113800_e2_789	19.1977	DBL containing protein, unknown function
PF3D7_1001800_e2_398	18.7067	Plasmodium exported protein (PHISTc), unknown function
PF3D7_1115700_e1s1_422	18.5532	cysteine proteinase falcipain 2a
PF3D7_1433500_e1s1_322	18.0015	DNA topoisomerase II, putative
PF3D7_0724700_e1s1_1006	17.9853	conserved Plasmodium protein, unknown function
PF3D7_1341800_82	17.9261	conserved Plasmodium protein, unknown function
PF3D7_1033200_e1s1_893	17.8781	early transcribed membrane protein 10.2 (ETRAMP10.2)
PF3D7_0812700_847	17.5254	RNA-binding protein (U1 snRNP-like), putative
PF3D7_1252400_e4s2_706	17.2401	reticulocyte binding protein homologue 3, pseudogene (RH3)
PF3D7_0910700_859	17.1838	actin-like protein, putative
PF3D7_1021700_e2s1_237	17.0186	conserved Plasmodium membrane protein, unknown function
PF3D7_1017300.1._e2_382	16.8845	NA
PF3D7_1018300_e2s2_526	16.3007	conserved Plasmodium protein, unknown function
PF3D7_1454200_s2_474	15.9663	conserved Plasmodium protein, unknown function
PF3D7_1302200_768	15.8063	early transcribed membrane protein 13 (ETRAMP13)
PF3D7_1337500_e1s1_159	15.7749	conserved Plasmodium protein, unknown function
PF3D7_1035200_989	15.5759	S-antigen
PF3D7_1012700_e1s1_168	15.4083	protein phosphatase, putative
PF3D7_1142700_571	15.2808	conserved protein, unknown function
PF3D7_1350100_e2s1_423	15.2197	lysine-tRNA ligase, putative
PF3D7_0203100_e1s1_434	15.1363	protein kinase, putative
PF3D7_1020200_e3s1_704	15.0933	kinesin, putative
PF3D7_0711000_e1s1_1023	14.8637	AAA family ATPase, CDC48 subfamily (Cdc48)
PF3D7_0806800_e1s1_801	14.723	vacuolar proton translocating ATPase subunit A, putative
PF3D7_0307300_281	14.6798	EB1 homolog, putative
PF3D7_1252700_e2_473	14.489	Plasmodium exported protein (PHISTb), unknown function
PF3D7_0425400_e2_681	14.4806	Plasmodium exported protein (PHISTa), unknown function
PF3D7_0827800_e1s3_287	14.2438	SET domain protein, putative (SET3)
PF3D7_0529400.1_e5s1_991	14.1568	conserved Plasmodium protein, unknown function
PF3D7_1218700_851	14.0268	conserved Plasmodium protein, unknown function
PF3D7_0803800_e2s1_143	13.8177	20S proteasome beta subunit
PF3D7_1346400_e1s1_349	13.714	conserved Plasmodium protein, unknown function
PF3D7_0215600_850	13.5262	conserved Plasmodium protein, unknown function
PF3D7_0522400_e4s1_833	13.5256	conserved Plasmodium protein, unknown function
PF3D7_1233400_e1_1051	13.3277	conserved Plasmodium membrane protein, unknown function
PF3D7_0827100_s1_469	13.2883	translation initiation factor IF-2, putative
PF3D7_1118200_e1s1_1119	13.2328	heat shock protein 90, putative
PF3D7_0812100_e1s1_162	13.1433	conserved Plasmodium protein, unknown function
PF3D7_1435500_479	13.0485	conserved Plasmodium protein, unknown function
PF3D7_1434500_e2s3_139	12.9332	dynein-related AAA-type ATPase, putative
PF3D7_0914700_570	12.8162	transporter, putative
PF3D7_0719400_s1_174	12.7124	conserved Plasmodium protein, unknown function
PF3D7_1448300_s1_628	12.643	conserved Plasmodium protein, unknown function
PF3D7_1462300_e1s1_891	12.1488	conserved Plasmodium protein, unknown function
PF3D7_0728000_e2_260	12.1133	eukaryotic translation initiation factor 2 alpha subunit, putative
PF3D7_0707800_e1s2_922	12.0549	RAP protein, putative
PF3D7_1023200_183	12.0477	orotidine monophosphate decarboxylase (OMPDC)
PF3D7_1315300_e2_379	11.9545	conserved Plasmodium protein, unknown function
PF3D7_0725100_e1s2_1105	11.8896	conserved Plasmodium membrane protein, unknown function
PF3D7_1008100_s4_1114	11.7923	conserved Plasmodium protein, unknown function
PF3D7_1008600_842	11.7855	zinc finger C-x8-C-x5-C-x3-H type, putative
PF3D7_1014600_e1s4_736	11.5779	transcriptional coactivator ADA2 (ADA2)
PF3D7_1207400_e2_561	11.5271	conserved Plasmodium protein, unknown function
PF3D7_0905300_s6_173	11.5111	dynein heavy chain, putative
PF3D7_1110400_e3s1_517	11.458	asparagine-rich antigen
PF3D7_1323500_777	11.4275	plasmepsin V (PMV)
PF3D7_0521900_e2s2_1108	11.2763	conserved Plasmodium protein, unknown function
PF3D7_1444100_e7s1_426	11.27	conserved Plasmodium protein, unknown function
PF3D7_1014600_e1s3_161	11.0722	transcriptional coactivator ADA2 (ADA2)
PF3D7_1468900_284	11.0344	conserved Plasmodium protein, unknown function
PF3D7_0622800_s2_763	10.9357	leucyl tRNA synthase
PF3D7_1468100_e2s1_58	10.8413	conserved Plasmodium protein, unknown function
PF3D7_1129600_e1s2_731	10.7225	phosphatidylinositol-4-phosphate-5-kinase, putative
PF3D7_1475100_e1s4_461	10.6204	conserved Plasmodium protein, unknown function
PF3D7_1245600_e1s2_437	10.3762	kinesin, putative
PF3D7_0509600_e2_283	10.3243	asparagine-tRNA ligase, putative
PF3D7_1221900_106	10.3155	conserved Plasmodium membrane protein, unknown function
PF3D7_0628200_s2_73	10.314	protein kinase PK4 (PK4)
PF3D7_1140100_e2_1055	10.2186	vacuolar ATP synthase subunit f, putative
PF3D7_1143600_271	9.96226	conserved Plasmodium protein, unknown function
PF3D7_1350900_832	9.8963	transcription factor with AP2 domain(s) (ApiAP2)
PF3D7_0804500_e2s2_757	9.84084	conserved Plasmodium membrane protein, unknown function
PF3D7_1472100_e1_558	9.53537	Yip1 protein, putative
PF3D7_1117500_282	9.32913	tyrosine-tRNA ligase, putative
PF3D7_1118600_1121	9.2664	histone acetyltransferase, putative (MYST)
PF3D7_1402300_797	9.18688	26S proteasome regulatory subunit (RPN6)
PF3D7_1136300_e2s1_457	8.96124	tudor staphylococcal nuclease (TSN)
PF3D7_0730300_e1s1_1102	8.9606	transcription factor with AP2 domain(s) (ApiAP2)
PF3D7_1417200_e1s4_616	8.94048	NOT family protein, putative
PF3D7_0219600_e1s1_158	8.86952	replication factor C subunit 1, putative
PF3D7_0930800_e2s2_167	8.85228	conserved Plasmodium membrane protein, unknown function
PF3D7_1036000_658	8.84791	merozoite surface protein (MSP11)
PF3D7_1325900_e1s1_709	8.78719	conserved Plasmodium protein, unknown function
PF3D7_1329000_e2s1_1089	8.78245	DNA-directed RNA polymerase 3 largest subunit
PF3D7_0629700_e1s3_348	8.72136	SET domain protein, putative (SET1)
PF3D7_0502500_86	8.70671	conserved Plasmodium protein, unknown function
PF3D7_0623400_769	8.61115	RNA-binding protein mei2 homologue, putative
PF3D7_0102200_e2s2_21	8.4812	ring-infected erythrocyte surface antigen (RESA)
PF3D7_1021900_e1s2_715	8.4748	conserved Plasmodium protein (10b antigen), unknown function
PF3D7_1408700_e2s2_1106	8.42297	conserved Plasmodium protein, unknown function
PF3D7_0731500_e1s1_185	8.38276	erythrocyte binding antigen-175 (EBA175)
PF3D7_1419200_e1s1_408	8.36323	conserved Plasmodium protein, unknown function
PF3D7_0523800_1149	8.30983	transporter, putative
PF3D7_1217200_e1s1_513	8.25878	snoRNA-associated small subunit rRNA processing protein, putative
PF3D7_0920700_787	8.20686	conserved Plasmodium protein, unknown function
PF3D7_1310700_e1s1_702	8.19812	conserved Plasmodium protein, unknown function
PF3D7_1202600_e2s1_1132	8.16139	conserved protein, unknown function
PF3D7_0110000_653	8.0431	conserved Plasmodium protein, unknown function
PF3D7_1024800_e2s2_620	8.04226	conserved Plasmodium protein, unknown function
PF3D7_0915400_e1s1_807	8.00947	6-phosphofructokinase (PFK9)
PF3D7_1201700_e2_765	7.92364	conserved Plasmodium membrane protein, unknown function
PF3D7_1338300_e2s1_723	7.90891	elongation factor 1-gamma, putative
PF3D7_1133200_e1s2_132	7.80487	conserved Plasmodium protein, unknown function
PF3D7_0511400_361	7.74976	conserved Plasmodium protein, unknown function
PF3D7_1206900_664	7.61304	conserved Plasmodium protein, unknown function
PF3D7_1031400.1_e8_577	7.54204	OTU-like cysteine protease, putative
PF3D7_1208100_e3s1_444	7.45706	conserved Plasmodium protein, unknown function
PF3D7_1332200_e1s1_726	7.45031	conserved Plasmodium protein, unknown function
PF3D7_1115300_e1s1_1001	7.43195	cysteine proteinase falcipain 2b (FP2B)
PF3D7_1004200_e1s1_521	7.39021	conserved Plasmodium membrane protein, unknown function
PF3D7_0402200_e1s1_902	7.38699	surface-associated interspersed gene 4.1, pseudogene (SURFIN4.1) (SURF4.1)
PF3D7_1408400_e1s2_522	7.3461	DNA-repair helicase, putative
PF3D7_0801000_e2s1_23	7.344	Plasmodium exported protein (PHISTc), unknown function
PF3D7_0305500_e1s1_246	7.27629	conserved Plasmodium protein, unknown function
PF3D7_0808200_e1s1_319	7.2409	plasmepsin X
PF3D7_1319900_s2_180	7.15223	conserved Plasmodium protein, unknown function
PF3D7_1022000_e2_632	7.10095	RNA binding protein, putative
PF3D7_1249800_e1s3_335	7.06786	conserved Plasmodium protein, unknown function
PF3D7_1227300_e1s1_1100	7.04389	conserved Plasmodium protein, unknown function
PF3D7_0726400_e6s1_520	6.95407	conserved Plasmodium membrane protein, unknown function
PF3D7_0506900_394	6.90795	rhomboid protease ROM4 (ROM4)
PF3D7_1336700_846	6.90281	conserved Plasmodium protein, unknown function
PF3D7_0410300_e1_569	6.90155	protein phosphatase, putative
PF3D7_1149000_e1s1_802	6.89363	antigen 332, DBL-like protein (Pf332)
PF3D7_0728900_e1_562	6.88166	RNA binding protein, putative
PF3D7_0103400_e1s1_1025	6.84553	zinc-carboxypeptidase, putative
PF3D7_0617400_e2_61	6.79804	erythrocyte membrane protein 1, PfEMP1 (VAR)
PF3D7_0522400_e3s3_452	6.71921	conserved Plasmodium protein, unknown function
PF3D7_1364200_e1s1_737	6.67283	conserved Plasmodium protein, unknown function
PF3D7_1406300_771	6.65802	glycerophodiester phosphodiesterase, putative
PF3D7_1355500_962	6.64959	serine/threonine protein phosphatase (PP5)
PF3D7_0113200_e2_1065	6.62913	Plasmodium exported protein, unknown function
PF3D7_1036900_e1s2_130	6.62845	conserved Plasmodium protein, unknown function
PF3D7_0207700_e2_966	6.5948	serine repeat antigen 4 (SERA4)
PF3D7_1440500_e1s1_445	6.59171	allantoicase, putative
PF3D7_0205900_e2_175	6.5812	proteasome 26S regulatory subunit, putative
PF3D7_0506800_e1_1037	6.56299	conserved Plasmodium protein, unknown function
PF3D7_1037600_e2s1_431	6.51161	DNA repair helicase rad25, putative
PF3D7_1351800.1_941	6.43524	conserved Plasmodium protein, unknown function
PF3D7_0313100_e1_790	6.41372	ubiquitin-protein ligase, putative (HRD3)
PF3D7_0414700_961	6.36237	GTP binding protein, putative
PF3D7_0717700_e1s1_1090	6.33552	seryl-tRNA synthetase, putative
PF3D7_1211000_e3s1_164	6.30189	kinesin-like protein, putative
PF3D7_0500800_e2s1_610	6.28811	mature parasite-infected erythrocyte surface antigen,erythrocyte membrane protein 2 (MESA)
PF3D7_0104100_e2_1078	6.28177	conserved Plasmodium membrane protein, unknown function
PF3D7_0313800_e5_87	6.26277	conserved Plasmodium protein, unknown function
PF3D7_1109200_e3_405	6.25296	conserved Plasmodium protein, unknown function
PF3D7_0420700_e2s1_605	6.23711	erythrocyte membrane protein 1, PfEMP1 (VAR)
PF3D7_0819800_e15s1_308	6.23586	conserved Plasmodium protein, unknown function
PF3D7_1433400_e2s5_1032	6.2158	conserved Plasmodium membrane protein, unknown function
PF3D7_1023100_e1s2_542	6.20588	dynein heavy chain, putative
PF3D7_0726600_e1_963	6.11886	conserved Plasmodium protein, unknown function
PF3D7_1215900_673	6.1183	conserved Plasmodium membrane protein, unknown function (PfSR10)
PF3D7_1132300_112	6.08403	nucleic acid binding protein, putative
PF3D7_1410100_e1_79	6.08145	alpha/beta hydrolase, putative
PF3D7_0315400_365	6.06867	conserved Plasmodium protein, unknown function
PF3D7_0625800_384	6.03693	conserved Plasmodium protein, unknown function
PF3D7_1221600_196	6.01569	conserved Plasmodium protein, unknown function
PF3D7_1340900_e1_674	5.89912	sodium-dependent phosphate transporter (PiT)
PF3D7_1229100_s3_1045	5.89252	ABC transporter, (CT family) (MRP2)
PF3D7_0303700_e1s1_598	5.86725	dihydrolipoamide acyltransferase, putative
PF3D7_0519900_487	5.86232	conserved Plasmodium protein, unknown function
PF3D7_1459000_675	5.76929	ATP-dependent RNA helicase DBP5 (DBP5)
PF3D7_1335900_390	5.76231	sporozoite surface protein 2 (TRAP)
PF3D7_0300100_CIDR1_286	5.75026	erythrocyte membrane protein 1, PfEMP1 (VAR)
PF3D7_1035900_959	5.73089	probable protein, unknown function
PF3D7_1229100_s1_187	5.71192	ABC transporter, (CT family) (MRP2)
PF3D7_1445300_e1_1126	5.71093	mitochondrial ribosomal protein S29 precursor, putative
PF3D7_1469600_e1s4_165	5.64815	biotin carboxylase subunit of acetyl CoA carboxylase, putative (ACC1)
PF3D7_0902800_e2_1147	5.64064	serine repeat antigen 9 (SERA9)
PF3D7_0207400_e2_99	5.59195	serine repeat antigen 7 (SERA7)
PF3D7_0501800_e1s2_318	5.56545	chromosome assembly factor 1 (CAF1)
PF3D7_1020300_e1s1_707	5.53652	cytoplasmic dynein intermediate chain, putative
PF3D7_1015100_80	5.49831	conserved protein, unknown function
PF3D7_0529400.1_e7s1_213	5.42774	conserved Plasmodium protein, unknown function
PF3D7_1401300_e2_90	5.40905	aminopeptidase, putative
PF3D7_0711700_e2s1_28	5.40772	erythrocyte membrane protein 1, PfEMP1 (VAR)
PF3D7_0607600_e1_965	5.36096	conserved Plasmodium protein, unknown function
PF3D7_0209800_e2_555	5.28787	ATP-dependent RNA helicase UAP56 (UAP56)
PF3D7_1478000_e2_979	5.26887	Plasmodium exported protein (PHISTa), unknown function (GEXP17)
PF3D7_1322000_e1_209	5.22959	adenosine-diphosphatase, putative
PF3D7_0206000_s2_764	5.22953	DNA repair endonuclease, putative
PF3D7_1211900_e1s1_614	5.1276	non-SERCA-type Ca2 -transporting P-ATPase (ATP4)
PF3D7_1140700_e1s2_137	5.1178	conserved Plasmodium protein, unknown function
PF3D7_1100800_e2_934	5.08966	Pfmc-2TM Maurer's cleft two transmembrane protein (MC-2TM)
PF3D7_0703500_e2s2_1103	5.08523	erythrocyte membrane-associated antigen
PF3D7_1360400_367	5.02457	conserved Plasmodium protein, unknown function
PF3D7_1235300_s1_257	4.98561	CCR4-NOT transcription complex subunit 4, putative (NOT4)
PF3D7_1242600_e1_202	4.97485	protein geranylgeranyltransferase type II, alpha subunit, putative
PF3D7_0318900_e3_490	4.93223	conserved protein, unknown function
PF3D7_0702300_e2_633	4.91286	sporozoite threonine and asparagine-rich protein (STARP)
PF3D7_1353400_750	4.89715	Ran-binding protein, putative
PF3D7_0307700_e3s2_716	4.86282	conserved Plasmodium protein, unknown function
PF3D7_0722800_93	4.86205	conserved Plasmodium protein, unknown function
PF3D7_0207600_e4s1_524	4.79888	serine repeat antigen 5 (SERA5)
PF3D7_0831000_e2_1069	4.7674	Plasmodium exported protein (PHISTb), unknown function (GEXP09)
PF3D7_1035700_e1s1_32	4.75636	duffy binding-like merozoite surface protein (DBLMSP)
PF3D7_1244600_e1s1_992	4.753	ADP-ribosylation factor GTPase-activating protein, putative
PF3D7_1215100_e1s1_1026	4.7337	conserved Plasmodium protein, unknown function
PF3D7_0823800_247	4.72111	DnaJ protein, putative
PF3D7_0731600_e1s1_332	4.6791	acyl-coA synthetase, PfACS5 (ACS5)
PF3D7_0730300_e1s2_436	4.63508	transcription factor with AP2 domain(s) (ApiAP2)
PF3D7_0103900_204	4.55857	parasite-infected erythrocyte surface protein (PIEPS15)
PF3D7_1123400_e1_342	4.53521	translation elongation factor EF-1, subunit alpha, putative
PF3D7_0317700_e1s1_1110	4.53045	CPSF (cleavage and polyadenylation specific factor), subunit A, putative
PF3D7_0620400_958	4.52857	merozoite surface protein 10 (MSP10)
PF3D7_0622800_s1_176	4.4998	leucyl tRNA synthase
PF3D7_1408700_e2s1_232	4.4948	conserved Plasmodium protein, unknown function
PF3D7_1304100_e2s1_152	4.46697	DNA ligase I (LigI)
PF3D7_1108900_482	4.441	conserved Plasmodium protein, unknown function
PF3D7_1206700_486	4.41761	eukaryotic translation initiation factor 5, putative
PF3D7_1321700_e2s1_502	4.41345	splicing factor, putative
PF3D7_1129100_e1s1_887	4.39751	parasitophorous vacuolar protein 1 (PV1)
PF3D7_1308200_e2s1_368	4.39006	carbamoyl phosphate synthetase (cpsSII)
PF3D7_0403700_e5_693	4.383	CGI-201 protein, short form
PF3D7_0532100_915	4.38249	early transcribed membrane protein 5 (ETRAMP5)
PF3D7_1252400_e2s1_504	4.37536	reticulocyte binding protein homologue 3, pseudogene (RH3)
PF3D7_1038400_e4s1_419	4.3695	gametocyte-specific protein (Pf11-1)
PF3D7_1448000_e2s1_127	4.33586	U3 snoRNA-associated small subunit rRNA processing protein, putative
PF3D7_0823300_72	4.3314	histone acetyltransferase GCN5 (GCN5)
PF3D7_1454200_s1_468	4.32609	conserved Plasmodium protein, unknown function
PF3D7_1311600_1064	4.32014	conserved Plasmodium protein, unknown function
PF3D7_0801800_60	4.30656	mannose-6-phosphate isomerase, putative
PF3D7_0520200_97	4.29819	conserved Plasmodium protein, unknown function
PF3D7_1449900_553	4.27001	conserved Plasmodium protein, unknown function
PF3D7_0826100_s2_825	4.26687	E3 ubiquitin-protein ligase, putative
PF3D7_0419700_699	4.21944	apical merozoite protein (Pf34)
PF3D7_0715200_e1s1_808	4.21553	conserved Plasmodium protein, unknown function
PF3D7_1021700_e1s3_438	4.19992	conserved Plasmodium membrane protein, unknown function
PF3D7_0602200_e1_978	4.19787	MYND finger protein, putative
PF3D7_0627300_956	4.19192	c3h4-type ring finger protein, putative
PF3D7_0935800_e1_1134	4.17386	cytoadherence linked asexual protein 9 (CLAG9)
PF3D7_1471400_e2s1_136	4.16048	diacylglycerol kinase, putative
PF3D7_1001300_e2_77	4.13501	Plasmodium exported protein (PHISTa), unknown function
PF3D7_0106000_219	4.1321	conserved Plasmodium protein, unknown function
PF3D7_1335300_e1s1_311	4.12427	reticulocyte binding protein 2 homologue b (RH2b)
PF3D7_1124300_e1_1071	4.08461	conserved Plasmodium protein, unknown function
PF3D7_0726400_e3s1_794	4.07833	conserved Plasmodium membrane protein, unknown function
PF3D7_1354900_496	4.02629	conserved Plasmodium protein, unknown function
PF3D7_0304100_1073	4.02519	membrane skeletal protein IMC1-related (ALV2)
PF3D7_0932500_CIDR1_575	4.02516	DHHC-type zinc finger protein, putative
PF3D7_0902200_e2_497	4.01925	serine/threonine protein kinase, FIKK family (FIKK9.3)
PF3D7_1475400_e3s4_255	4.00289	cysteine repeat modular protein 4 (CRMP4)
PF3D7_0831400_e2_655	3.99885	Plasmodium exported protein, unknown function
PF3D7_1223600_e1_181	3.98637	conserved Plasmodium protein, unknown function
PF3D7_1461800_e1s1_450	3.97577	conserved Plasmodium protein, unknown function
PF3D7_0202200_e2_402	3.97403	Plasmodium exported protein, unknown function
PF3D7_1453700_e2s1_414	3.95859	co-chaperone p23 (P23)
PF3D7_0806500_e1s1_705	3.95597	DnaJ protein, putative
PF3D7_0220000_e2s2_643	3.95081	liver stage antigen 3 (LSA3)
PF3D7_0214100_e1s2_465	3.95073	protein transport protein sec31 (SEC31)
PF3D7_0803600._e14_108	3.94829	NA
PF3D7_1248700_s2_909	3.91989	conserved Plasmodium protein, unknown function
PF3D7_1300300_e2_371	3.91677	erythrocyte membrane protein 1, PfEMP1 (VAR)
PF3D7_1479000_123	3.91185	acyl-CoA synthetase (ACS1a)
PF3D7_0925800_e1s1_748	3.89477	conserved Plasmodium protein, unknown function
PF3D7_0102600_e2_217	3.88292	serine/threonine protein kinase, FIKK family (FIKK1)
PF3D7_0906500_780	3.87838	arginase
PF3D7_0931300_359	3.86677	asparagine-rich antigen, putative
PF3D7_0911300_e1s1_256	3.86651	cysteine repeat modular protein 1 (CRMP1)
PF3D7_0211200_1136	3.81897	Rab GTPase 5a (RAB5a)
PF3D7_0730200_e4_280	3.80292	adapter-related protein, putative
PF3D7_1114900_e1s2_326	3.77742	conserved Plasmodium protein, unknown function
PF3D7_1368800_e1s1_1109	3.77136	DNA repair endonuclease, putative
PF3D7_0713900_e1s1_1005	3.7607	conserved Plasmodium protein, unknown function
PF3D7_1312700_1067	3.73645	probable protein, unknown function
PF3D7_0713900_e1s4_46	3.73589	conserved Plasmodium protein, unknown function
PF3D7_0708000_e1s1_239	3.73564	cytoskeleton associated protein, putative
PF3D7_1349900_261	3.73116	conserved Plasmodium protein, unknown function
PF3D7_1114000_e1_1135	3.72883	dynein light chain type 2, putative
PF3D7_0917900_e2_1144	3.71645	heat shock protein 70 (Hsp70-2)
PF3D7_1466400_e1s1_621	3.70575	transcription factor with AP2 domain(s) (ApiAP2)
PF3D7_0219700_e2_980	3.69298	Plasmodium exported protein (PHISTc), unknown function (GEXP20)
PF3D7_1223600_e2s1_746	3.69046	conserved Plasmodium protein, unknown function
PF3D7_1139300_e2s3_330	3.68987	transcription factor with AP2 domain(s) (ApiAP2)
PF3D7_1005100_e1s2_1091	3.67848	conserved protein, unknown function
PF3D7_0713100_e2_364	3.64856	Pfmc-2TM Maurer's cleft two transmembrane protein (MC-2TM)
PF3D7_0310200_e1s4_157	3.64667	phd finger protein, putative
PF3D7_0407700_e2s2_619	3.63664	conserved Plasmodium protein, unknown function
PF3D7_0515000_e1s1_820	3.62628	RNA recognition motif, putative
PF3D7_0314300_e1_277	3.62457	DER1-like protein (Der1-2)
PF3D7_1021700_e1s2_33	3.62412	conserved Plasmodium membrane protein, unknown function
PF3D7_1023100_e1s4_40	3.6015	dynein heavy chain, putative
PF3D7_0717200_e1_378	3.58922	conserved Plasmodium protein, unknown function
PF3D7_1114700_e1_1044	3.58685	serine/threonine protein kinase, putative (CLK3)
PF3D7_1122900_e2s5_904	3.56281	dynein heavy chain, putative
PF3D7_1221000_e1s3_153	3.56107	histone-lysine N-methyltransferase, H3 lysine-4 specific (SET10)
PF3D7_0518700_e1s1_331	3.55429	mRNA-binding protein PUF1 (PUF1)
PF3D7_1233600_e1s3_451	3.53751	asparagine and aspartate rich protein 1 (AARP1)
PF3D7_1302000_e2_78	3.53399	Plasmodium exported protein, unknown function
PF3D7_0702300_e2_960	3.53276	sporozoite threonine and asparagine-rich protein (STARP)
PF3D7_0108300_s2_354	3.52927	conserved Plasmodium protein, unknown function
PF3D7_1030200_1070	3.50475	conserved Plasmodium protein, unknown function
PF3D7_0916700_e1s1_511	3.49471	RNA-binding protein musashi, putative (HoMu)
PF3D7_0203200_483	3.47685	conserved Plasmodium protein, unknown function
PF3D7_1121800_s3_352	3.46165	petidase, M16 family
PF3D7_1465800_e5s2_622	3.43644	dynein beta chain, putative
PF3D7_1335100_338	3.43333	merozoite surface protein 7 (MSP7)
PF3D7_1339600_e1s1_435	3.42586	conserved Plasmodium protein, unknown function
PF3D7_1446700_e1_103	3.42381	conserved Plasmodium protein, unknown function
PF3D7_1132900_110	3.40457	glycine cleavage H protein (GCVH)
PF3D7_1476500_e2_945	3.40282	probable protein, unknown function
PF3D7_1102500_e2s1_600	3.38949	Plasmodium exported protein (PHISTb), unknown function (GEXP02)
PF3D7_1100100_CIDR2_285	3.37856	erythrocyte membrane protein 1, PfEMP1 (VAR)
PF3D7_1229300_396	3.375	conserved Plasmodium protein, unknown function
PF3D7_1441300_e5s1_156	3.37403	serine/threonine protein kinase, putative
PF3D7_0509400_e1s1_926	3.36951	RNA polymerase I (RNAPI)
PF3D7_0319700_e1s1_947	3.3677	ABC transporter, putative
PF3D7_1140800_676	3.36611	conserved Plasmodium protein, unknown function
PF3D7_0522400_e3s6_741	3.36418	conserved Plasmodium protein, unknown function
PF3D7_0816200_688	3.34951	vacuolar protein-sorting protein VPS2, putative
PF3D7_0320500_1061	3.34236	conserved Plasmodium protein, unknown function
PF3D7_0424800_e2_656	3.33735	Plasmodium exported protein (PHISTb), unknown function
PF3D7_0622300_e3_573	3.33637	conserved Plasmodium protein, unknown function
PF3D7_1140700_e1s3_996	3.32307	conserved Plasmodium protein, unknown function
PF3D7_1033100_s2_634	3.31806	S-adenosylmethionine decarboxylase/ornithine decarboxylase (AdoMetDC/ODC)
PF3D7_1308200_e2s2_148	3.31358	carbamoyl phosphate synthetase (cpsSII)
PF3D7_0935600_e2_122	3.2986	gametocytogenesis-implicated protein (GIG)
PF3D7_0402100_e2s1_985	3.28064	Plasmodium exported protein (PHISTb), unknown function
PF3D7_1122300_1048	3.27835	conserved Plasmodium protein, unknown function
PF3D7_1332600_1076	3.27217	apurinic/apyrimidinic endonuclease Apn1, putative (APN1)
PF3D7_0904900_e1s3_1123	3.26606	Cu2 -transporting ATPase, putative (CUP)
PF3D7_0824600_e1_270	3.25986	anamorsin related protein, putative
PF3D7_1014600_e1s1_1036	3.25697	transcriptional coactivator ADA2 (ADA2)
PF3D7_1213400_e1s1_514	3.25381	conserved Plasmodium protein, unknown function
PF3D7_1358500_953	3.25148	zinc finger protein, putative
PF3D7_0529400.1_e1s1_829	3.24579	conserved Plasmodium protein, unknown function
PF3D7_1452000_s1_642	3.21256	rhoptry neck protein 2 (RON2)
PF3D7_1340600_e1s1_993	3.20821	RNA lariat debranching enzyme, putative (DBR1)
PF3D7_0424100_e2_84	3.1866	reticulocyte binding protein homologue 5 (RH5)
PF3D7_1469600_e1s3_467	3.18219	biotin carboxylase subunit of acetyl CoA carboxylase, putative (ACC1)
PF3D7_0111000_e1s2_1097	3.16864	kinesin, putative
PF3D7_1329100_e3s2_1015	3.15443	myosin C (MyoC)
PF3D7_1149000_e1s6_906	3.15007	antigen 332, DBL-like protein (Pf332)
PF3D7_0904200_e1_1130	3.14623	conserved Plasmodium protein, unknown function
PF3D7_0804500_e2s3_186	3.11203	conserved Plasmodium membrane protein, unknown function
PF3D7_1117100_195	3.10544	deubiquinating/deneddylating enzyme (UCH54)
PF3D7_1208100_e2s2_1099	3.10112	conserved Plasmodium protein, unknown function
PF3D7_0402000_e1_1056	3.0813	Plasmodium exported protein (PHISTa), unknown function
PF3D7_1142800_254	3.06764	conserved Plasmodium protein, unknown function
PF3D7_1417200_e1s5_38	3.06551	NOT family protein, putative
PF3D7_1107800_e1s1_696	3.04733	transcription factor with AP2 domain(s) (ApiAP2)
PF3D7_0206900.1_e1_647	3.04364	merozoite surface protein 5
PF3D7_1205000_e1_1150	3.01726	conserved Plasmodium protein, unknown function
PF3D7_1115200_e2_795	3.00987	SET domain protein, putative (SET7)
PF3D7_0510400_1059	3.00595	conserved Plasmodium protein, unknown function
PF3D7_1104200_e1s2_1043	3.00074	chromatin remodeling protein (SNF2L)
PF3D7_0313600_e5_782	2.99906	conserved Plasmodium protein, unknown function
PF3D7_1414600_e1s1_433	2.99105	RNA guanylyltransferase (Pgt1)
PF3D7_1036400_e2s1_929	2.97245	liver stage antigen 1 (LSA1)
PF3D7_0509700_e4s1_1080	2.96892	conserved Plasmodium protein, unknown function
PF3D7_0216200_e1_305	2.96169	conserved Plasmodium protein, unknown function
PF3D7_0220600_e2_392	2.93385	Plasmodium exported protein (hyp9), unknown function
PF3D7_1432300_e2_594	2.9203	conserved Plasmodium protein, unknown function
PF3D7_0111500_e4s1_713	2.90565	UMP-CMP kinase, putative
PF3D7_0933100_e4_387	2.90564	conserved Plasmodium protein, unknown function
PF3D7_0605400_976	2.90076	calcium-binding protein, putative
PF3D7_0701000_968	2.89736	erythrocyte membrane protein 1 (PfEMP1), pseudogene
PF3D7_1401100_e2s1_721	2.87564	DnaJ protein, putative
PF3D7_1139500.1_e1s1_800	2.85948	AAA family ATPase, putative
PF3D7_1030800_977	2.857	calmodulin, putative
PF3D7_1346000_e2_657	2.85458	conserved Plasmodium protein, unknown function
PF3D7_0207700_e4_412	2.85113	serine repeat antigen 4 (SERA4)
PF3D7_1313600_e1s2_236	2.84531	conserved Plasmodium protein, unknown function
PF3D7_1322300_e3s2_516	2.8405	translation initiation factor EIF-2B subunit related
PF3D7_1141900_481	2.83975	inner membrane complex protein 1b, putative (IMC1b)
PF3D7_1035100_670	2.81484	probable protein, unknown function
PF3D7_1228800_e1s1_738	2.81289	conserved Plasmodium protein, unknown function
PF3D7_1435300_e1s4_1004	2.8061	NAD(P)H-dependent glutamate synthase, putative
PF3D7_1208100_e3s2_804	2.80534	conserved Plasmodium protein, unknown function
PF3D7_0829000_e2s1_1052	2.79368	conserved Plasmodium membrane protein, unknown function
PF3D7_1356300_e2_477	2.79259	ubiquitin conjugating enzyme, putative
PF3D7_0709900_e1s2_476	2.78748	conserved Plasmodium membrane protein, unknown function
PF3D7_1001600_e2_972	2.77178	alpha/beta hydrolase, putative
PF3D7_0808600_e2s1_317	2.76698	erythrocyte membrane protein 1, PfEMP1 (VAR)
PF3D7_1209400_e1s1_325	2.76518	conserved Plasmodium protein, unknown function
PF3D7_0826100_s1_744	2.74953	E3 ubiquitin-protein ligase, putative
PF3D7_1470100_e1s3_154	2.7277	conserved Plasmodium protein, unknown function
PF3D7_0322300_727	2.72275	acyl CoA:diacylglycerol acyltransferase, putative
PF3D7_0910800_1062	2.71911	nucleotide binding protein, putative
PF3D7_1035600_659	2.71325	merozoite surface protein (H101)
PF3D7_0620200_1049	2.6957	conserved Plasmodium protein, unknown function
PF3D7_1477500_e2_957	2.69277	Plasmodium exported protein (PHISTb), unknown function
PF3D7_1436500_e2_756	2.68917	conserved protein, unknown function
PF3D7_1370300_e1_357	2.68696	membrane associated histidine-rich protein (MAHRP1)
PF3D7_0726100_e2_854	2.68118	Plasmodium exported protein, unknown function
PF3D7_0305600_786	2.67391	AP endonuclease (DNA-[apurinic or apyrimidinic site] lyase), putative
PF3D7_0511600_363	2.67246	conserved Plasmodium protein, unknown function
PF3D7_0801000_e2s2_897	2.66987	Plasmodium exported protein (PHISTc), unknown function
PF3D7_1451900_e1s2_722	2.66135	small subunit rRNA processing factor, putative
PF3D7_1227100_e1s1_418	2.66013	DNA helicase 60 (DH60)
PF3D7_0908800_e1_206	2.65421	transporter, putative
PF3D7_0409300_e1_866	2.64879	conserved Plasmodium protein, unknown function
PF3D7_0619000.1_e12_556	2.61292	conserved Plasmodium protein, unknown function
PF3D7_0714500_1060	2.60476	transcription elongation factor s-II, putative
PF3D7_0409100_e2_494	2.59884	U4/U6 small nuclear ribonucleoprotein PRP31, putative (PRPF31)
PF3D7_0601100_e2_269	2.59874	Plasmodium exported protein (hyp4), unknown function
PF3D7_0817300_e1s3_857	2.5977	asparagine-rich antigen
PF3D7_1222600_e1s1_538	2.59713	transcription factor with AP2 domain(s) (ApiAP2)
PF3D7_1322700_761	2.5848	conserved Plasmodium protein, unknown function
PF3D7_0407000_491	2.5737	conserved Plasmodium protein, unknown function
PF3D7_0806600_e5s1_233	2.56503	kinesin-like protein, putative
PF3D7_1335700_e2_990	2.56119	conserved Plasmodium protein, unknown function
PF3D7_0707700_677	2.56001	ubiquitin-protein ligase e3, putative
PF3D7_1146800_e2_220	2.54841	conserved Plasmodium protein, unknown function
PF3D7_1110100_e1_1084	2.54225	conserved Plasmodium protein, unknown function
PF3D7_1466300_e1s1_55	2.52345	26S proteasome regulatory subunit, putative
PF3D7_0300100_DBL2_279	2.5208	erythrocyte membrane protein 1, PfEMP1 (VAR)
PF3D7_1025900_e1s1_816	2.50971	conserved Plasmodium protein, unknown function
PF3D7_0519500_e1s3_815	2.49245	carbon catabolite repressor protein 4, putative (CCR4)
PF3D7_0719000_687	2.48508	conserved Plasmodium protein, unknown function
PF3D7_0728100_s6_1034	2.47781	conserved Plasmodium membrane protein, unknown function
PF3D7_0823300_e1s1_1083	2.47605	histone acetyltransferase GCN5 (GCN5)
PF3D7_1304300_652	2.47333	conserved Plasmodium protein, unknown function
PF3D7_1457900_e1s4_532	2.47231	conserved Plasmodium protein, unknown function
PF3D7_1023100_e1s3_329	2.46186	dynein heavy chain, putative
PF3D7_1203500_1148	2.4589	conserved Plasmodium protein, unknown function
PF3D7_1002500_e1_933	2.45618	conserved Plasmodium protein, unknown function
PF3D7_1442700_e2s2_531	2.45071	conserved Plasmodium protein, unknown function
PF3D7_1247500_858	2.44959	serine/threonine protein kinase, putative
PF3D7_1001700_e2_393	2.44273	Plasmodium exported protein (PHISTc), unknown function
PF3D7_1247100_e1_262	2.43965	conserved Plasmodium protein, unknown function
PF3D7_0308000_1140	2.42261	DNA polymerase epsilon subunit b, putative
PF3D7_1149600_e2_775	2.42092	DnaJ protein, putative
PF3D7_1142100_e1s3_252	2.41821	conserved Plasmodium protein, unknown function
PF3D7_0601700_e2_1137	2.40991	Plasmodium exported protein (PHISTa), unknown function, pseudogene
PF3D7_0402400_e2_76	2.40989	Plasmodium exported protein, unknown function (GEXP18)
PF3D7_1325900_e1s3_39	2.40287	conserved Plasmodium protein, unknown function
PF3D7_1209900_1151	2.38856	ABC transporter, (TAP family), putative
PF3D7_1021700_e2s2_1096	2.38465	conserved Plasmodium membrane protein, unknown function
PF3D7_0823300_e1s2_896	2.38357	histone acetyltransferase GCN5 (GCN5)
PF3D7_0420000_s3_1124	2.36959	zinc finger protein, putative
PF3D7_1233600_e1s2_131	2.36266	asparagine and aspartate rich protein 1 (AARP1)
PF3D7_0310300_e1s2_1092	2.35974	phosphoglycerate mutase, putative
PF3D7_0207000_e1_358	2.35591	merozoite surface protein 4 (MSP4)
PF3D7_1106300_e2_964	2.3518	exonuclease, putative
PF3D7_1036400_e2s2_62	2.33397	liver stage antigen 1 (LSA1)
PF3D7_0904900_e1s1_362	2.32699	Cu2 -transporting ATPase, putative (CUP)
PF3D7_0404800_e1_1133	2.32456	conserved Plasmodium protein, unknown function
PF3D7_0726400_e6s2_231	2.32108	conserved Plasmodium membrane protein, unknown function
PF3D7_0220000_e2s1_932	2.3208	liver stage antigen 3 (LSA3)
PF3D7_0529800_e1_506	2.30735	conserved Plasmodium protein, unknown function
PF3D7_1434500_e2s4_47	2.29627	dynein-related AAA-type ATPase, putative
PF3D7_1128100_e2_68	2.28771	cochaperone prefoldin complex subunit, putative
PF3D7_1401600_e3s1_215	2.2804	Plasmodium exported protein (PHISTb), unknown function
PF3D7_1134700_e2s2_921	2.27844	DNA-directed RNA polymerase 1, subunit 2, putative
PF3D7_0108700_e1s1_29	2.26589	secreted ookinete protein, putative (PSOP24)
PF3D7_0707800_e1s1_837	2.24512	RAP protein, putative
PF3D7_1464000_e1s1_518	2.23487	YL1 nuclear protein, putative
PF3D7_1477900_e1_766	2.22282	acyl-CoA synthetase, pseudogene (ACS1b)
PF3D7_1470100_e1s2_241	2.21884	conserved Plasmodium protein, unknown function
PF3D7_1250600_924	2.2147	eukaryotic translation initiation factor 2b, subunit 2, putative
PF3D7_1139300_e2s2_995	2.21167	transcription factor with AP2 domain(s) (ApiAP2)
PF3D7_1459100_565	2.20779	conserved Plasmodium protein, unknown function
PF3D7_1330800_e2s1_225	2.19926	conserved Plasmodium protein, unknown function
PF3D7_0220700_e2_689	2.18712	Plasmodium exported protein (hyp9), unknown function
PF3D7_1408700_e1s3_244	2.18507	conserved Plasmodium protein, unknown function
PF3D7_0929000_e2_369	2.15686	conserved Plasmodium protein, unknown function
PF3D7_1403200_e4s2_740	2.15594	conserved Plasmodium protein, unknown function
PF3D7_1446700_e1_391	2.15072	conserved Plasmodium protein, unknown function
PF3D7_0107600_e1s2_844	2.14691	serine/threonine protein kinase, putative
PF3D7_1125800_e1_375	2.14558	kelch protein, putative
PF3D7_0800300_e2s1_894	2.12837	erythrocyte membrane protein 1, PfEMP1 (VAR)
PF3D7_0203600_376	2.10183	conserved Plasmodium protein, unknown function
PF3D7_1300300_CIDR1_863	2.0976	erythrocyte membrane protein 1, PfEMP1 (VAR)
PF3D7_0729900_e2s3_1107	2.08298	dynein heavy chain, putative
PF3D7_1041300_CIDR1_567	2.06533	erythrocyte membrane protein 1, PfEMP1 (VAR)
PF3D7_0528200_e2s1_793	2.05928	eukaryotic translation initiation factor 3, subunit 6, putative
PF3D7_0920300_e1_182	2.05922	conserved Plasmodium protein, unknown function
PF3D7_0709900_e3_1125	2.05178	conserved Plasmodium membrane protein, unknown function
PF3D7_0313000_e1_938	2.05036	conserved Plasmodium protein, unknown function
PF3D7_1438000_e1s1_235	2.04339	eukaryotic translation initiation factor eIF2A, putative
PF3D7_1341600_211	2.04089	dolichyl-phosphate-mannose-glygolipidalpha-mannosyltransferase, putative (Alg9)
PF3D7_0304600_916	2.03087	circumsporozoite (CS) protein (CSP)
PF3D7_0107300_e2_692	2.02925	probable protein, unknown function
PF3D7_0318200_e1s1_242	2.02656	DNA-directed RNA polymerase II, putative
PF3D7_1471200_e1_796	2.022	inorganic anion exchanger, inorganic anion antiporter (SulP)
PF3D7_1466200_e1s2_910	2.01596	conserved Plasmodium protein, unknown function
PF3D7_1433400_e2s3_752	1.9898	conserved Plasmodium membrane protein, unknown function
PF3D7_1208200_e3s3_828	1.98472	cysteine repeat modular protein 3 (CRMP3)
PF3D7_1105800_e1s1_133	1.97845	conserved Plasmodium protein, unknown function
PF3D7_0520100_e1s1_719	1.97521	protein phosphatase, putative
PF3D7_1434500_e2s2_830	1.96247	dynein-related AAA-type ATPase, putative
PF3D7_1022300_e2_1057	1.95902	zinc transporter, putative
PF3D7_1320800_e3_928	1.95581	dihydrolipamide succinyltransferase component of 2-oxoglutarate dehydrogenase complex
PF3D7_1118600_207	1.9488	histone acetyltransferase, putative (MYST)
PF3D7_1212400_649	1.94761	tetratricopeptide repeat family protein, putative
PF3D7_1110200_e1s1_523	1.93986	pre-mRNA-processing factor 6, putative (PRPF6)
PF3D7_0302200_e1_389	1.92521	cytoadherence linked asexual protein 3.2 (CLAG3.2)
PF3D7_1226900_e1s1_1011	1.91644	conserved Plasmodium protein, unknown function
PF3D7_1448600_470	1.89745	SNARE protein, putative (VTI1)
PF3D7_1212700_s1_56	1.88496	eukaryotic translation initiation factor 3 subunit 10, putative
PF3D7_1021200_501	1.87931	conserved Plasmodium protein, unknown function
PF3D7_1477000_83	1.87662	Plasmodium exported protein (hyp17), unknown function, pseudogene
PF3D7_1025200_16	1.87644	conserved Plasmodium protein, unknown function
PF3D7_0408700_e3s1_430	1.86997	perforin like protein 1 (SPECT2)
PF3D7_0525300_485	1.86767	conserved Plasmodium protein, unknown function
PF3D7_1429500_105	1.86466	diphthamide synthesis protein, putative
PF3D7_0713900_e1s3_822	1.86298	conserved Plasmodium protein, unknown function
PF3D7_0323800_e2s1_912	1.85651	conserved Plasmodium protein, unknown function
PF3D7_0522400_e3s2_1033	1.8548	conserved Plasmodium protein, unknown function
PF3D7_0931700_e2_564	1.8409	conserved Plasmodium protein, unknown function
PF3D7_0212100_268	1.83839	conserved Plasmodium protein, unknown function
PF3D7_1110200_e2s1_413	1.83711	pre-mRNA-processing factor 6, putative (PRPF6)
PF3D7_1346400_e1s4_638	1.82051	conserved Plasmodium protein, unknown function
PF3D7_1205200_264	1.8199	conserved Plasmodium protein, unknown function
PF3D7_0828400_1072	1.81273	mitochondrial inner membrane protein, putative (Oxa1)
PF3D7_1001100.1_550	1.80948	acyl-CoA binding protein, isoform 1, ACBP1 (ACBP1)
PF3D7_1208100_e1_946	1.80894	conserved Plasmodium protein, unknown function
PF3D7_1213500_e1_275	1.80818	conserved Plasmodium membrane protein, unknown function
PF3D7_0516400_114	1.80816	conserved Plasmodium protein, unknown function
PF3D7_0618900_e2_95	1.79427	N-acetylglucosamine transferase (GPI1)
PF3D7_0401900_107	1.78769	acyl-CoA synthetase (ACS6)
PF3D7_1343600_e2_178	1.78183	UDP-N-acetylglucosamine pyrophosphorylase, putative
PF3D7_1457000_e9_781	1.77584	signal peptide peptidase (SPP)
PF3D7_1345400_e3_701	1.7696	conserved Plasmodium protein, unknown function
PF3D7_1411600_383	1.76817	GTP binding protein, putative
PF3D7_0205600_665	1.76781	conserved Plasmodium protein, unknown function
PF3D7_1452000_s2_353	1.76598	rhoptry neck protein 2 (RON2)
PF3D7_0809200_e1s2_725	1.7611	asparagine-rich antigen Pfa55-14 (pfa55-14)
PF3D7_0621900_861	1.75595	conserved Plasmodium protein, unknown function
PF3D7_0511200_e1_266	1.7545	stearoyl-CoA delta 9 desaturase, putative
PF3D7_0102500_e1s2_34	1.74957	erythrocyte binding antigen-181 (EBA181)
PF3D7_1036400_e1_344	1.74679	liver stage antigen 1 (LSA1)
PF3D7_0816600_e1s2_505	1.74271	ClpB protein, putative (ClpB1)
PF3D7_0706100_e3_974	1.74187	conserved Plasmodium protein, unknown function
PFL_0008_CIDR2_278	1.73947	PFL_0008_CIDR2
PF3D7_1343900_199	1.73917	U4/U6 small nuclear ribonucleoprotein PRP4, putative (PRPF4)
PF3D7_0930300_s1_51	1.73351	merozoite surface protein 1 (MSP1)
PF3D7_0404600_s5_917	1.73174	conserved Plasmodium membrane protein, unknown function
PF3D7_1221000_e1s1_529	1.73	histone-lysine N-methyltransferase, H3 lysine-4 specific (SET10)
PF3D7_1133400_346	1.72133	apical membrane antigen 1 (AMA1)
PF3D7_0903500_e1s2_994	1.71424	conserved Plasmodium protein, unknown function
PF3D7_1018300_e1s1_337	1.70629	conserved Plasmodium protein, unknown function
PF3D7_1448700_759	1.69527	conserved Plasmodium protein, unknown function
PF3D7_1328500_e1s1_711	1.69216	alpha/beta-hydrolase, putative
PF3D7_1201500_950	1.68155	XPA binding protein 1, putative
PF3D7_0930300_s2_925	1.67977	merozoite surface protein 1 (MSP1)
PF3D7_0501800_e1s1_599	1.6779	chromosome assembly factor 1 (CAF1)
PF3D7_1301700_e2_111	1.67652	Plasmodium exported protein (hyp8), unknown function (GEXP07)
PF3D7_0310500_e1s1_1098	1.67471	DEAD box helicase, putative
PF3D7_0216900_488	1.67266	conserved Plasmodium protein, unknown function
PF3D7_0730900_e2s1_525	1.66722	Plasmodium exported protein, unknown function
PF3D7_0931300_1030	1.66625	asparagine-rich antigen, putative
PF3D7_1418100_s3_537	1.66551	liver specific protein 1, putative (LISP1)
PF3D7_1228600_e1s1_908	1.65624	merozoite surface protein 9 (MSP9)
PF3D7_0505500_e1s1_753	1.65451	DNA repair protein, putative
PF3D7_0102700_e2_848	1.62692	merozoite-associated tryptophan-rich antigen, putative
PF3D7_0905300_s5_1038	1.62487	dynein heavy chain, putative
PF3D7_0706100_e1_1155	1.6238	conserved Plasmodium protein, unknown function
PF3D7_0929000_e2_350	1.61286	conserved Plasmodium protein, unknown function
PF3D7_0930800_e2s4_826	1.59872	conserved Plasmodium membrane protein, unknown function
PF3D7_1329100_e3s3_814	1.59777	myosin C (MyoC)
PF3D7_1017100_937	1.58587	conserved Plasmodium protein, unknown function
PF3D7_1465300_e1_758	1.58371	tRNA 3???-trailer sequence RNase, putative
PF3D7_1227700_e1_404	1.578	conserved Plasmodium protein, unknown function
PF3D7_1466200_e1s3_324	1.57368	conserved Plasmodium protein, unknown function
PF3D7_1358000_e2s1_455	1.56757	patatin-like phospholipase, putative
PF3D7_0727700_e1s1_253	1.56522	conserved Plasmodium protein, unknown function
PF3D7_0911100_e1s1_717	1.56436	conserved Plasmodium protein, unknown function
PF3D7_1146000_776	1.54565	nucleolar preribosomal assembly protein, putative
PF3D7_1457300_e1s1_609	1.54555	conserved Plasmodium protein, unknown function
PF3D7_0509700_e6s1_1087	1.53354	conserved Plasmodium protein, unknown function
PF3D7_1445900_e1s1_214	1.5154	DEAD/DEAH box ATP-dependent RNA helicase, putative
PF3D7_0615800_e2_685	1.50944	conserved Plasmodium protein, unknown function
PF3D7_1300300_e1s2_421	1.50786	erythrocyte membrane protein 1, PfEMP1 (VAR)
PF3D7_1131600_s2_1115	1.49513	conserved Plasmodium protein, unknown function
PF3D7_0815500_e1_372	1.49385	conserved Plasmodium protein, unknown function
PF3D7_1442900_s2_636	1.49072	guanine nucleotide exchange factor, putative
PF3D7_0826500_e1s2_602	1.48783	ubiquitination-mediated degradation component, putative
PF3D7_0310300_e1s1_608	1.48486	phosphoglycerate mutase, putative
PF3D7_1305100_201	1.48085	conserved Plasmodium protein, unknown function
PF3D7_1004200_e2s1_527	1.4694	conserved Plasmodium membrane protein, unknown function
PF3D7_0911900_e2_343	1.45945	falstatin (ICP)
PF3D7_1410400_e1s1_35	1.45517	rhoptry-associated protein 1 (RAP1)
PF3D7_0511400_627	1.45103	conserved Plasmodium protein, unknown function
PF3D7_0422100_939	1.45057	transmembrane emp24 domain-containing protein, putative
PF3D7_1324300_e1s5_544	1.44973	conserved Plasmodium membrane protein, unknown function
PF3D7_0507300_248	1.44252	conserved Plasmodium protein, unknown function
PF3D7_0522400_e4s2_462	1.43956	conserved Plasmodium protein, unknown function
PF3D7_0823500_380	1.43612	membrane skeletal protein IMC1-related
PF3D7_0632800._CIDR2_1152	1.43399	NA
PF3D7_1311000_189	1.42977	conserved Plasmodium protein, unknown function
PF3D7_1149000_e1s4_336	1.42477	antigen 332, DBL-like protein (Pf332)
PF3D7_0317300_s3_454	1.41843	conserved Plasmodium protein, unknown function
PF3D7_1002000_e2_949	1.41446	Plasmodium exported protein (hyp2), unknown function
PF3D7_0911900_e2_370	1.41216	falstatin (ICP)
PF3D7_1136200_e5_385	1.40647	conserved Plasmodium protein, unknown function
PF3D7_1012200_e1_943	1.4037	conserved Plasmodium protein, unknown function
PF3D7_0911300_e1s2_50	1.40281	cysteine repeat modular protein 1 (CRMP1)
PF3D7_1475400_e3s3_749	1.40108	cysteine repeat modular protein 4 (CRMP4)
PF3D7_1465800_e4s2_1028	1.39759	dynein beta chain, putative
PF3D7_1202300_e3s2_806	1.39665	dynein heavy chain, putative
PF3D7_1303800_e1s3_1112	1.39612	conserved Plasmodium protein, unknown function
PF3D7_1404900_e1s1_703	1.39091	conserved Plasmodium protein, unknown function
PF3D7_1364400_e1s4_827	1.38884	conserved Plasmodium protein, unknown function
PF3D7_1015300_e1s1_223	1.38799	methionine aminopeptidase 1b, putative (MetAP1b)
PF3D7_1439100_e2s2_712	1.38383	DEAD/DEAH box helicase, putative
PF3D7_1122900_e2s3_730	1.38137	dynein heavy chain, putative
PF3D7_0933900_e4_646	1.37627	conserved Plasmodium protein, unknown function
PF3D7_0306200_e5_1047	1.37137	activator of Hsp90 ATPase (AHA1)
PF3D7_0824400_493	1.37063	nucleoside transporter 2 (NT2)
PF3D7_1201200_e2_1128	1.36817	Plasmodium exported protein, unknown function
PF3D7_1216900_e1s1_823	1.35842	DNA-binding chaperone, putative
PF3D7_1223600_e1_967	1.35601	conserved Plasmodium protein, unknown function
PF3D7_0804500_e1s1_1039	1.34959	conserved Plasmodium membrane protein, unknown function
PF3D7_1221000_e1s2_1021	1.34666	histone-lysine N-methyltransferase, H3 lysine-4 specific (SET10)
PF3D7_0108700_e1s2_888	1.34496	secreted ookinete protein, putative (PSOP24)
PF3D7_0731500_e1s2_345	1.33831	erythrocyte binding antigen-175 (EBA175)
PF3D7_0632800._CIDR1_856	1.33807	NA
PF3D7_1140700_e1s1_817	1.33648	conserved Plasmodium protein, unknown function
PF3D7_0322100_489	1.33473	RNA triphosphatase (Prt1)
PF3D7_0907200_e1s2_734	1.33263	GTPase activator, putative
PF3D7_0301900_770	1.33034	conserved Plasmodium protein, unknown function
PF3D7_0629700_e1s5_637	1.31485	SET domain protein, putative (SET1)
PF3D7_0936600_e2_366	1.30684	Plasmodium exported protein (PHISTb), unknown function (GEXP05)
PF3D7_0912500_e2_944	1.30665	conserved Plasmodium protein, unknown function
PF3D7_1008100_s3_460	1.29798	conserved Plasmodium protein, unknown function
PF3D7_0113300_e2_498	1.29554	Plasmodium exported protein (hyp1), unknown function
PF3D7_0317700_e1s2_821	1.29213	CPSF (cleavage and polyadenylation specific factor), subunit A, putative
PF3D7_0523000_e1s2_698	1.28522	multidrug resistance protein (MDR1)
PF3D7_0216700.1_e6_100	1.28288	conserved Plasmodium protein, unknown function
PF3D7_0813500_e1s1_1082	1.27335	conserved Plasmodium protein, unknown function
PF3D7_0532300_e2s1_20	1.27001	Plasmodium exported protein (PHISTb), unknown function
PF3D7_1007700_e1s2_903	1.26449	transcription factor with AP2 domain(s) (ApiAP2)
PF3D7_0629300_395	1.26395	phosphatidylcholine-sterol acyltransferase precursor, putative (PL)
PF3D7_0527900_377	1.26315	RNA helicase 1
PF3D7_1343100_410	1.26243	conserved Plasmodium protein, unknown function
PF3D7_0324100_e2_75	1.26236	Pfmc-2TM Maurer's cleft two transmembrane protein (MC-2TM)
PF3D7_1210100_1138	1.23639	syntaxin, Qa-SNARE family (SYN2)
PF3D7_0904900_e1s2_339	1.21444	Cu2 -transporting ATPase, putative (CUP)
PF3D7_0830300_1058	1.21294	conserved Plasmodium protein, unknown function
PF3D7_1364400_e1s1_458	1.20622	conserved Plasmodium protein, unknown function
PF3D7_1149000_e1s1_625	1.20506	antigen 332, DBL-like protein (Pf332)
PF3D7_1434600_e1s1_147	1.20094	methionine aminopeptidase 2 (MetAP2)
PF3D7_0704300_s1_59	1.19797	conserved Plasmodium membrane protein, unknown function
PF3D7_0818900_635	1.19794	heat shock protein 70 (Hsp70)
PF3D7_1212100_205	1.18007	peripheral plastid protein 1, putative (PPP1)
PF3D7_0502400_208	1.17839	ring-stage membrane protein 1,merozoite surface protein 8 (MSP8)
PF3D7_1202600_e1_1053	1.17442	conserved protein, unknown function
PF3D7_1243700_660	1.1658	ubiquitin conjugating enzyme E2, putative
PF3D7_1306500_e3s3_540	1.16139	MORN repeat protein, putative
PF3D7_0527200_e2s1_30	1.15512	ubiquitin carboxyl-terminal hydrolase, putative
PF3D7_0108300_s3_931	1.15312	conserved Plasmodium protein, unknown function
PF3D7_0501200_e2_54	1.15106	parasite-infected erythrocyte surface protein (PIESP2)
PF3D7_1200300_e2s1_604	1.14535	rifin (RIF)
PF3D7_0207500_e3s1_987	1.14307	serine repeat antigen 6 (SERA6)
PF3D7_1244100_e1s2_889	1.13489	conserved Plasmodium protein, unknown function
PF3D7_1002100_e2_672	1.13477	PF70 protein (PF70)
PF3D7_0731800_784	1.13388	alpha/beta hydrolase, putative (GEXP08)
PF3D7_1371900_e2_102	1.13374	Plasmodium exported protein, unknown function
PF3D7_0904000_484	1.13092	GTPase activator, putative
PF3D7_0220500_e2_682	1.13001	Plasmodium exported protein (hyp2), unknown function
PF3D7_0807800_e2s1_407	1.12704	proteasome subunit alpha type 5, putative
PF3D7_1420400_e1s1_1027	1.11664	glycyl-tRNA synthetase,glycine--tRNA ligase (GlyRS)
PF3D7_0206800_49	1.11609	merozoite surface protein 2 (MSP2)
PF3D7_0206900.1_e1short_74	1.09169	merozoite surface protein 5
PF3D7_1333800_e1s1_695	1.09117	conserved Plasmodium protein, unknown function
PF3D7_0425800_CIDR1_574	1.09056	erythrocyte membrane protein 1, PfEMP1 (VAR)
PF3D7_0831700_e2_88	1.07683	heat shock protein 70, putative (HSP70-x)
PF3D7_0820900_e1_1079	1.07304	conserved Plasmodium protein, unknown function
PF3D7_0304000_e4s1_900	1.06979	inner membrane complex protein 1a, putative (IMC1a)
PF3D7_0826300_667	1.06664	SPRY domain, putative
PF3D7_0630600_e2_388	1.06044	conserved Plasmodium protein, unknown function
PF3D7_0408500_1077	1.05527	flap endonuclease 1 (FEN1)
PF3D7_0405400_e2s1_43	1.05185	pre-mRNA-processing-splicing factor 8, putative (PRPF8)
PF3D7_1208100_e2s1_240	1.04171	conserved Plasmodium protein, unknown function
PF3D7_1332900_e1s1_724	1.04108	isoleucine-tRNA ligase, putative
PF3D7_0318200_e1s2_439	1.03754	DNA-directed RNA polymerase II, putative
PF3D7_1038400_e2s1_416	1.03212	gametocyte-specific protein (Pf11-1)
PF3D7_1426100_824	1.02762	basic transcription factor 3b, putative
PF3D7_1149500_e3_982	1.01389	ring-infected erythrocyte surface antigen 2, pseudogene (RESA2)
PF3D7_0826100_s9_1041	1.0112	E3 ubiquitin-protein ligase, putative
PF3D7_1035200_140	1.00293	S-antigen
PF3D7_1206900_e4_1075	1.00212	conserved Plasmodium protein, unknown function
PF3D7_1149200_e2s2_566	0.994887	ring-infected erythrocyte surface antigen
PF3D7_1121800_s1_641	0.9904	petidase, M16 family
PF3D7_1439800_e1_190	0.989809	vesicle-associated membrane protein, putative
PF3D7_1448500_e1s4_729	0.987703	chloroquine resistance marker protein (CRMP)
PF3D7_1329700_774	0.983951	conserved Plasmodium protein, unknown function
PF3D7_0620600_691	0.982839	conserved Plasmodium protein, unknown function
PF3D7_0419500_662	0.982352	conserved Plasmodium membrane protein, unknown function
PF3D7_1121700_e1s1_446	0.979914	protein GCN20 (GCN20)
PF3D7_1462300_e1s2_1095	0.975617	conserved Plasmodium protein, unknown function
PF3D7_0300100_CIDR2_864	0.97485	erythrocyte membrane protein 1, PfEMP1 (VAR)
PF3D7_0407800_e1s2_907	0.972941	conserved Plasmodium protein, unknown function
PF3D7_1366600_1040	0.967815	signal recognition particle receptor alpha subunit (SRPR-alpha)
PF3D7_0527600_e6_89	0.967527	conserved Plasmodium protein, unknown function
PF3D7_0617400_e1s3_930	0.966043	erythrocyte membrane protein 1, PfEMP1 (VAR)
PF3D7_1124500_495	0.965157	pyruvate dehydrogenase E1 alpha subunit (pdhA)
PF3D7_1036400_e1_935	0.962391	liver stage antigen 1 (LSA1)
PF3D7_0730800.1_e2s1_125	0.962089	Plasmodium exported protein, unknown function
PF3D7_0804800_e1s1_1003	0.959535	peptidyl-prolyl cis-trans isomerase (CYP24)
PF3D7_0407700_e2s1_519	0.950392	conserved Plasmodium protein, unknown function
PF3D7_1221400_e1s1_512	0.949583	membrane skeletal protein, putative (ALV3)
PF3D7_1008100_s1_919	0.948753	conserved Plasmodium protein, unknown function
PF3D7_1406400_198	0.945915	PPR repeat protein (PPR)
PF3D7_1011700_1068	0.941174	DNA repair protein RAD23, putative
PF3D7_1008000_s2_1031	0.940268	histone deacetylase, putative
PF3D7_1331000_274	0.938695	protein kinase, putative
PF3D7_0406200_626	0.93673	sexual stage-specific protein precursor (Pfs16)
PF3D7_1215400_94	0.93672	conserved Plasmodium protein, unknown function
PF3D7_1308400_e4s1_41	0.93505	conserved Plasmodium protein, unknown function
PF3D7_1348800_e1_116	0.932862	E1-E2 ATPase, putative
PF3D7_0409100_e2_259	0.932111	U4/U6 small nuclear ribonucleoprotein PRP31, putative (PRPF31)
PF3D7_1222300_e1s1_44	0.929407	endoplasmin homolog precursor, putative
PF3D7_0800200_e2s1_597	0.925009	erythrocyte membrane protein 1, PfEMP1 (VAR)
PF3D7_1008800_e1s1_141	0.924085	small subunit rRNA processing protein, putative
PF3D7_1136200_e1_860	0.923774	conserved Plasmodium protein, unknown function
PF3D7_1337300_e1_507	0.923595	exoribonuclease, putative
PF3D7_0906400_e1s1_911	0.920301	dynein light intermediate chain 2, cytosolic
PF3D7_1228400_s2_258	0.918929	conserved Plasmodium protein, unknown function
PF3D7_1469100_1129	0.909912	conserved Plasmodium protein, unknown function
PF3D7_0104800_783	0.903907	novel putative transporter 1 (NPT1)
PF3D7_0207600_e2s1_885	0.90168	serine repeat antigen 5 (SERA5)
PF3D7_0108300_s1_65	0.898479	conserved Plasmodium protein, unknown function
PF3D7_1126400_e2_680	0.887796	large ribosomal subunit processing factor, putative
PF3D7_1134000_e1s1_313	0.876247	heat shock protein 70 (Hsp70-3)
PF3D7_1149000_e1s2_245	0.875465	antigen 332, DBL-like protein (Pf332)
PF3D7_0202000_e2s1_697	0.864081	knob-associated histidine-rich protein (KAHRP)
PF3D7_1024800_e2s1_810	0.858928	conserved Plasmodium protein, unknown function
PF3D7_0317100_e2_1086	0.857315	conserved Plasmodium protein, unknown function
PF3D7_1011800_e1s2_119	0.856847	QF122 antigen
PF3D7_1212900_e1s1_126	0.855719	bromodomain protein, putative
PF3D7_1030400_e2_690	0.855135	conserved Plasmodium protein, unknown function
PF3D7_1137600_951	0.853972	conserved Plasmodium protein, unknown function
PF3D7_0110600_e1s1_509	0.853672	phosphatidylinositol-4-phosphate 5-kinase (PIP5K)
PF3D7_1465800_e5s4_708	0.846096	dynein beta chain, putative
PF3D7_1033700_e3s1_406	0.845049	bromodomain protein, putative
PF3D7_0913200_999	0.841442	elongation factor 1-beta (EF-1beta)
PF3D7_1405500_663	0.827922	conserved Plasmodium protein, unknown function
PF3D7_1417200_e1s1_905	0.82414	NOT family protein, putative
PF3D7_1472200_e1s2_1046	0.817591	histone deacetylase, putative
PF3D7_1203700_e3_920	0.810788	nucleosome assembly protein (NAPL)
PF3D7_1252400_e3s1_117	0.810278	reticulocyte binding protein homologue 3, pseudogene (RH3)
PF3D7_0912900_e2s1_1008	0.807103	26S proteasome regulatory subunit, putative
PF3D7_0907700_e1s1_26	0.799709	subunit of proteaseome activator complex, putative
PF3D7_0815500_e3_661	0.798157	conserved Plasmodium protein, unknown function
PF3D7_0511500_s3_918	0.79765	RNA pseudouridylate synthase, putative
PF3D7_1036500_411	0.795732	probable protein, unknown function
PF3D7_0819400_499	0.795107	perforin like protein 4 (PPLP4)
PF3D7_0935600_e1_669	0.793863	gametocytogenesis-implicated protein (GIG)
PF3D7_0530100_e2_356	0.786752	SNARE protein, putative (SYN6)
PF3D7_0207800_e2_973	0.784347	serine repeat antigen 3 (SERA3)
PF3D7_1436300_e1s1_48	0.780707	translocon component PTEX150 (PTEX150)
PF3D7_0103500_e2_975	0.779971	conserved Plasmodium protein, unknown function
PF3D7_0306400_e1s1_1094	0.779578	FAD-dependent glycerol-3-phosphate dehydrogenase, putative
PF3D7_0203100_e2s2_441	0.77905	protein kinase, putative
PF3D7_0310200_e1s3_913	0.775936	phd finger protein, putative
PF3D7_1319900_s1_1035	0.774592	conserved Plasmodium protein, unknown function
PF3D7_0903500_e1s1_321	0.774543	conserved Plasmodium protein, unknown function
PF3D7_1328500_e1s2_1012	0.771581	alpha/beta-hydrolase, putative
PF3D7_1442400_e1s3_409	0.771059	conserved Plasmodium protein, unknown function
PF3D7_0508300_760	0.770742	triose phosphate transporter (oTPT)
PF3D7_0832300_e2_654	0.770302	Plasmodium exported protein (PHISTa-like), unknown function
PF3D7_1128500_1142	0.768365	conserved protein, unknown function
PF3D7_0724200_948	0.768107	immunoglobulin-binding protein 1-related, putative
PF3D7_1346400_e1s3_927	0.766419	conserved Plasmodium protein, unknown function
PF3D7_0603100_981	0.765744	conserved Plasmodium protein, unknown function
PF3D7_1467200_700	0.763765	conserved Plasmodium protein, unknown function
PF3D7_1444100_e6s1_732	0.762429	conserved Plasmodium protein, unknown function
PF3D7_1348800_e3_101	0.75629	E1-E2 ATPase, putative
PF3D7_1405400_e1s1_533	0.75629	DNA mismatch repair protein, putative
PF3D7_0323300_273	0.753589	conserved Plasmodium protein, unknown function
PF3D7_0404600_s3_453	0.753589	conserved Plasmodium membrane protein, unknown function
PF3D7_1132400_e2s2_836	0.749712	conserved Plasmodium membrane protein, unknown function
PF3D7_1214100_e2_845	0.748734	phosphatidylinositol-glycan biosynthesis class O protein, putative
PF3D7_1314200_e1s3_449	0.748126	telomerase reverse transcriptase, putative (TERT)
PF3D7_0619000.1_e2_212	0.74611	conserved Plasmodium protein, unknown function
PF3D7_1432900_e1s1_510	0.741533	SF-assemblin, putative
PF3D7_1024400_e1_191	0.74029	conserved Plasmodium protein, unknown function
PF3D7_1139300_e2s1_129	0.73942	transcription factor with AP2 domain(s) (ApiAP2)
PF3D7_1365700_e1_480	0.737844	conserved Plasmodium membrane protein, unknown function
PF3D7_1422700_e1s1_234	0.717231	conserved Plasmodium protein, unknown function
PF3D7_1040800_e2s1_144	0.716631	rifin (RIF)
PF3D7_0701900_e2s1_617	0.711278	Plasmodium exported protein, unknown function
PF3D7_0618700_e1_113	0.710634	transport protein particle (TRAPP) component, putative
PF3D7_0921600_e1s2_1104	0.700732	tetratricopeptide repeat family protein, putative
PF3D7_1036300_683	0.697553	merozoite surface protein (MSP3.8)
PF3D7_1302600_772	0.691413	deoxyhypusine hydroxylase (DOHH)
PF3D7_1126000_e1s2_1009	0.690842	threonyl-tRNA synthetase,Threonine--tRNA ligase (ThrRS)
PF3D7_0629700_e1s1_163	0.688042	SET domain protein, putative (SET1)
PF3D7_0513200_e2s3_36	0.687206	conserved Plasmodium protein, unknown function
PF3D7_1419400_e1s2_899	0.687206	conserved Plasmodium membrane protein, unknown function
PF3D7_1001500_940	0.677529	early transcribed membrane protein 10.1 (ETRAMP10)
PF3D7_1115400_e1s1_1000	0.673182	cysteine proteinase falcipain 3
PF3D7_0302800_e1s1_27	0.648356	conserved Plasmodium protein, unknown function
PF3D7_0906200_952	0.648249	conserved Plasmodium protein, unknown function
PF3D7_1133100_e1s2_466	0.644566	conserved membrane protein, unknown function
PF3D7_1334800_936	0.631318	MSP7-like protein (MSRP2)
PF3D7_0935900_e2s1_24	0.626834	ring-exported protein 1 (REX1)
PF3D7_1139300_e1s1_1081	0.626518	transcription factor with AP2 domain(s) (ApiAP2)
PF3D7_0219900_e2_645	0.620017	Plasmodium exported protein, unknown function
PF3D7_1423700_e1s1_613	0.611619	conserved Plasmodium protein, unknown function
PF3D7_1239200_e1s2_243	0.611186	transcription factor with AP2 domain(s) (ApiAP2)
PF3D7_1322200_e1s1_1024	0.609298	conserved Plasmodium protein, unknown function
PF3D7_1205500_e1s2_327	0.608737	zinc finger protein, putative
PF3D7_0936300_e2_71	0.607733	ring-exported protein 3 (REX3)
PF3D7_0501100.1_e3s1_306	0.607297	heat shock protein 40, type II (HSP40)
PF3D7_1300300_e1s1_1029	0.606126	erythrocyte membrane protein 1, PfEMP1 (VAR)
PF3D7_0826500_e1s1_813	0.605623	ubiquitination-mediated degradation component, putative
PF3D7_1325900_e1s2_998	0.605454	conserved Plasmodium protein, unknown function
PF3D7_0223300_e2s1_316	0.599308	erythrocyte membrane protein 1 (PfEMP1), truncated
PF3D7_0819600_e2_401	0.597942	conserved Plasmodium protein, unknown function
PF3D7_1015600_e2s1_424	0.597714	heat shock protein 60 (HSP60)
PF3D7_1238800_e1s1_1014	0.597215	acyl-CoA synthetase, PfACS11 (ACS11)
PF3D7_1218300_e1s1_812	0.594448	adaptor protein subunit, putative
PF3D7_1329000_e1s2_420	0.592021	DNA-directed RNA polymerase 3 largest subunit
PF3D7_1208200_e3s2_539	0.589212	cysteine repeat modular protein 3 (CRMP3)
PF3D7_1307400_e1_272	0.589142	conserved Plasmodium protein, unknown function
PF3D7_0509400_e1s3_743	0.587792	RNA polymerase I (RNAPI)
PF3D7_1239700_e1s1_334	0.586953	cell division protein FtsH, putative
PF3D7_1233600_e1s1_1111	0.586436	asparagine and aspartate rich protein 1 (AARP1)
PF3D7_1232100_e1_179	0.586381	60 kDa chaperonin (CPN60)
PF3D7_0716300_e1s1_606	0.583424	conserved Plasmodium protein, unknown function
PF3D7_0200100_e1s2_623	0.580853	erythrocyte membrane protein 1, PfEMP1 (VAR)
PF3D7_0207000_e1_53	0.580324	merozoite surface protein 4 (MSP4)
PF3D7_0110500_e1s3_612	0.575832	bromodomain protein, putative
PF3D7_1011300_852	0.574322	conserved Plasmodium membrane protein, unknown function
PF3D7_1308100_557	0.573976	CCAAT-binding transcription factor, putative
PF3D7_0804600_373	0.570847	U2 snRNA/tRNA pseudouridine synthase, putative
PF3D7_1014100_s1_64	0.570012	conserved Plasmodium protein, unknown function
PF3D7_1107800_e2s1_249	0.56071	transcription factor with AP2 domain(s) (ApiAP2)
PF3D7_1303800_e1s1_160	0.557797	conserved Plasmodium protein, unknown function
PF3D7_1247100_e2_942	0.546473	conserved Plasmodium protein, unknown function
PF3D7_0630400_762	0.544315	conserved Plasmodium protein, unknown function
PF3D7_0702400_e1s1_17	0.535933	conserved Plasmodium protein, unknown function
PF3D7_0110500_e1s2_901	0.531767	bromodomain protein, putative
PF3D7_0905400_e7s1_603	0.528496	high molecular weight rhoptry protein 3 (RhopH3)
PF3D7_0907400_e1s1_1016	0.528358	ATP-dependent protease ATPase subunit ClpY (ClpY)
PF3D7_1113600_1131	0.526169	Rpr2, RNAse P, putative
PF3D7_1205800_e3_883	0.523462	conserved Plasmodium protein, unknown function
PF3D7_0501100.1_e4s1_884	0.522313	heat shock protein 40, type II (HSP40)
PF3D7_0204000_e1_276	0.521464	conserved Plasmodium protein, unknown function
PF3D7_1334200_e1s1_310	0.521131	chaperone binding protein, putative
PF3D7_1254100_e2s1_596	0.509533	stevor (stevor)
PF3D7_0708400_e2_69	0.504432	heat shock protein 90 (HSP90)
PF3D7_1335300_e1s2_22	0.487467	reticulocyte binding protein 2 homologue b (RH2b)
PF3D7_1321900_1113	0.487467	conserved Plasmodium protein, unknown function
PF3D7_1476600_e2_629	0.486105	Plasmodium exported protein, unknown function
PF3D7_1346500_1066	0.482236	conserved Plasmodium protein, unknown function
PF3D7_1116400_194	0.46541	ER membrane protein Sec12 (SEC12)
PF3D7_0825700_70	0.464087	conserved Plasmodium protein, unknown function
PF3D7_1352800_e1_684	0.464087	vacuolar fusion protein MON1, putative
PF3D7_1364400_e1s2_735	0.464087	conserved Plasmodium protein, unknown function
PF3D7_0614400_104	0.459774	conserved Plasmodium protein, unknown function
PF3D7_0318300_e3s1_914	0.425413	conserved Plasmodium protein, unknown function
PF3D7_0310500_e1s2_809	0.41596	DEAD box helicase, putative
PF3D7_0909500_57	0.414869	subpellicular microtubule protein 1, putative (SPM1)
PF3D7_0404800_e1_85	0.414778	conserved Plasmodium protein, unknown function
PF3D7_0512200_508	0.414558	glutathione synthetase (GS)
PF3D7_1011800_e1s1_803	0.414018	QF122 antigen
PF3D7_0832300_e1s2_138	0.412321	Plasmodium exported protein (PHISTa-like), unknown function
PF3D7_1328300_e1_360	0.410744	conserved Plasmodium protein, unknown function
PF3D7_1368800_e1s2_1017	0.406506	DNA repair endonuclease, putative
PF3D7_1126000_e1s1_895	0.406076	threonyl-tRNA synthetase,Threonine--tRNA ligase (ThrRS)
PF3D7_1022200_e2s1_142	0.405156	conserved Plasmodium membrane protein, unknown function
PF3D7_1123100_e2s1_238	0.405156	calcium-dependent protein kinase 7 (CDPK7)
PF3D7_0529400.1_e9s1_791	0.405156	conserved Plasmodium protein, unknown function
PF3D7_0905300_s2_1122	0.405156	dynein heavy chain, putative
PF3D7_1138400_e1s4_615	0.404662	guanylyl cyclase (GCalpha)
PF3D7_1012700_e1s2_63	0.404143	protein phosphatase, putative
PF3D7_1014100_s2_923	0.401779	conserved Plasmodium protein, unknown function
PF3D7_0830500_e2_955	0.40135	tryptophan/threonine-rich antigen (TryThrA)
PF3D7_1224500_e2_767	0.400389	chromatin assembly protein (ASF1), putative
PF3D7_1125700_e6_666	0.399631	kelch protein, putative
PF3D7_1020700_e1s2_226	0.396626	ribosomal processing ATPase, putative
PF3D7_0918900_e1s2_1013	0.388949	gamma-glutamylcysteine synthetase (gammaGCS)
PF3D7_1128300_e1s1_31	0.38697	6-phosphofructokinase (PFK11)
PF3D7_1447800_e1s2_535	0.386081	conserved Plasmodium protein, unknown function
PF3D7_1473100_e2s1_892	0.382076	GTPase activator, putative
PF3D7_0936800_e2s1_792	0.377192	Plasmodium exported protein (PHISTc), unknown function
PF3D7_0222900_1127	0.377163	erythrocyte membrane protein 1 (PfEMP1), exon2, pseudogene (VAR)
PF3D7_1457900_e1s2_251	0.366328	conserved Plasmodium protein, unknown function
PF3D7_1304500_e1s1_425	0.36464	small heat shock protein, putative
PF3D7_0801700_e1_500	0.36464	sentrin-specific protease 2, putative (SENP2)
PF3D7_1441800_e3_67	0.364222	SNF7 family protein, putative
PF3D7_1028500_e3_862	0.355901	conserved Plasmodium protein, unknown function
PF3D7_1208800_e1s2_1093	0.349677	zinc finger protein, putative
PF3D7_0425100_e2_472	0.348065	Plasmodium exported protein (hyp6), unknown function
PF3D7_1473000_355	0.34633	conserved Plasmodium protein, unknown function
PF3D7_1149200_e2s1_351	0.340331	ring-infected erythrocyte surface antigen
PF3D7_1252100_e8s2_611	0.336954	rhoptry neck protein 3 (RON3)
PF3D7_0910500_e1s2_747	0.335932	DNA repair protein REV1, putative
PF3D7_1434500_e2s5_541	0.328176	dynein-related AAA-type ATPase, putative
PF3D7_1420300_849	0.312614	zinc finger protein, putative
PF3D7_1138400_e1s3_151	0.298792	guanylyl cyclase (GCalpha)
PF3D7_0412000_98	0.283609	conserved Plasmodium protein, unknown function
PF3D7_0620500_785	0.283609	cleavage stimulation factor subunit 1-like protein, putative
PF3D7_1405400_e4s1_118	0.27348	DNA mismatch repair protein, putative
PF3D7_0731200_e2_648	0.260864	Plasmodium exported protein, unknown function
PF3D7_0203100_e2s3_37	0.255248	protein kinase, putative
PF3D7_0709900_e2_340	0.255248	conserved Plasmodium membrane protein, unknown function
PF3D7_0717500_e2s1_799	0.255248	calcium dependent protein kinase 4 (CDPK4)
PF3D7_1450500_e3s2_230	0.212707	conserved Plasmodium protein, unknown function
PF3D7_1137900_e2_115	0.208083	conserved Plasmodium protein, unknown function
PF3D7_1347700_e1_374	0.207872	ethanolamine-phosphate cytidylyltransferase, putative (ECT)
PF3D7_0728200_e2_778	0.207872	actin-like protein, putative
PF3D7_1222600_e1s2_169	0.20776	transcription factor with AP2 domain(s) (ApiAP2)
PF3D7_0515600_e1s1_983	0.20776	conserved Plasmodium protein, unknown function
PF3D7_0214100_e1s1_843	0.207642	protein transport protein sec31 (SEC31)
PF3D7_1346000_e1s1_898	0.207642	conserved Plasmodium protein, unknown function
PF3D7_1462400_e1s2_427	0.207519	conserved Plasmodium protein, unknown function
PF3D7_1416600_e1s1_528	0.207519	conserved Plasmodium protein, unknown function
PF3D7_1202300_s1_798	0.207519	dynein heavy chain, putative
PF3D7_1025500_e2s3_442	0.207253	conserved Plasmodium protein, unknown function
PF3D7_1468100_e2s2_742	0.207253	conserved Plasmodium protein, unknown function
PF3D7_1227300_e1s2_811	0.207253	conserved Plasmodium protein, unknown function
PF3D7_0309600_e1s1_124	0.207109	60S acidic ribosomal protein P2, putative
PF3D7_0918900_e1s1_216	0.207109	gamma-glutamylcysteine synthetase (gammaGCS)
PF3D7_0501400_e1_686	0.207109	interspersed repeat antigen (FIRA)
PF3D7_1353100_e2s1_25	0.206958	Plasmodium exported protein, unknown function
PF3D7_1032900_e1s1_440	0.206958	RNA polymerase II-associated protein 1, putative
PF3D7_0826100_s3_52	0.206798	E3 ubiquitin-protein ligase, putative
PF3D7_1222700_399	0.206798	glideosome-associated protein 45 (GAP45)
PF3D7_0202500_651	0.206798	early transcribed membrane protein 2 (ETRAMP2)
PF3D7_0410900_288	0.206629	conserved Plasmodium protein, unknown function
PF3D7_1420700_e2_1007	0.206451	surface protein, Pf113 (Pf113)
PF3D7_1205500_e1s1_1118	0.206451	zinc finger protein, putative
PF3D7_1116800_e4s1_155	0.206261	heat shock protein 101 (HSP101)
PF3D7_0804900_192	0.206261	GTPase activator, putative
PF3D7_1216500_e1s1_314	0.206261	male development gene 1 (MDV1)
PF3D7_1111300_841	0.205616	SNARE protein, putative (GS27)
PF3D7_0425800_DBL4_1145	0.205616	erythrocyte membrane protein 1, PfEMP1 (VAR)
PF3D7_0507700_e1s1_135	0.20511	nuclear protein localization protein 4, putative (NPL4)
PF3D7_1469600_e1s2_834	0.20511	biotin carboxylase subunit of acetyl CoA carboxylase, putative (ACC1)
PF3D7_0908500_e18s1_145	0.204829	conserved Plasmodium protein, unknown function
PF3D7_0800200_e1s3_997	0.204829	erythrocyte membrane protein 1, PfEMP1 (VAR)
PF3D7_0812100_e1s2_448	0.199507	conserved Plasmodium protein, unknown function
PF3D7_1122900_e2s2_624	0.197637	dynein heavy chain, putative
PF3D7_0705000_e1s1_755	0.197513	methyltransferase, putative
PF3D7_1477600_e1_694	0.19689	surface-associated interspersed protein 14.1 (SURFIN 14.1) (Surf14.1)
PF3D7_0206200_1063	0.196488	metabolite/drug transporter, putative
PF3D7_1218900_1085	0.19298	conserved Plasmodium protein, unknown function
PF3D7_1435700.1_e1s1_1002	0.191436	ataxin-2 like protein, putative
PF3D7_1028700_91	0.186118	merozoite TRAP-like protein (MTRAP)
PF3D7_0827600_e2_397	0.186118	conserved Plasmodium protein, unknown function
PF3D7_1349600_e2_121	0.18232	conserved Plasmodium protein, unknown function
PF3D7_1113400_e4s1_984	0.18232	ubiquitin domain containing protein
PF3D7_1408700_e3s1_1101	0.18232	conserved Plasmodium protein, unknown function
PF3D7_1208800_e1s1_312	0.177256	zinc finger protein, putative
PF3D7_1458000_200	0.170165	cysteine proteinase falcipain 1
PF3D7_0812000_e1_668	0.170165	conserved Plasmodium protein, unknown function
PF3D7_0302500_e1s1_315	0.141804	cytoadherence linked asexual protein 3.1 (CLAG3.1)
PF3D7_0506200_988	0.141804	transcription initiation factor TFiid, TATA-binding protein (TBP)
PF3D7_1469800_e3_478	0.106353	conserved Plasmodium protein, unknown function
PF3D7_1321100_e3s1_618	0.100097	conserved Plasmodium protein, unknown function
PF3D7_0310500_e1s3_42	0	DEAD box helicase, putative
PF3D7_1401400_66	0	early transcribed membrane protein 14.1 (ETRAMP14)
PF3D7_1023000_81	0	conserved Plasmodium membrane protein, unknown function
PF3D7_1451500_109	0	conserved Plasmodium protein, unknown function
PF3D7_0500800_e2s2_120	0	mature parasite-infected erythrocyte surface antigen,erythrocyte membrane protein 2 (MESA)
PF3D7_0724700_e2s2_146	0	conserved Plasmodium protein, unknown function
PF3D7_1138400_e1s5_150	0	guanylyl cyclase (GCalpha)
PF3D7_0710400_172	0	nucleotide excision repair protein, putative
PF3D7_1218400_e1_184	0	triose or hexose phosphate/phosphate translocator, putative
PF3D7_0905600_e2_210	0	conserved Plasmodium protein, unknown function
PF3D7_1010600_e1s1_221	0	eukaryotic translation initiation factor 2 beta subunit, putative
PF3D7_0813400_e2s1_224	0	conserved Plasmodium protein, unknown function
PF3D7_0709100_e1s2_227	0	Cg1 protein
PF3D7_1005500_e2s2_228	0	regulator of nonsense transcripts, putative
PF3D7_1419400_e1s1_229	0	conserved Plasmodium membrane protein, unknown function
PF3D7_1134500_s1_265	0	alpha/beta hydrolase, putative
PF3D7_0709100_e1s1_320	0	Cg1 protein
PF3D7_0826100_s8_341	0	E3 ubiquitin-protein ligase, putative
PF3D7_1134500_s2_347	0	alpha/beta hydrolase, putative
PF3D7_1035800_386	0	probable protein, unknown function
PF3D7_1449000_e3_400	0	conserved Plasmodium protein, unknown function
PF3D7_1301400_e2_403	0	Plasmodium exported protein (hyp12), unknown function
PF3D7_0301400_e2_471	0	Plasmodium exported protein, unknown function
PF3D7_1431100_e1s1_503	0	conserved Plasmodium protein, unknown function
PF3D7_1202300_s1_515	0	dynein heavy chain, putative
PF3D7_1122900_e1s1_534	0	dynein heavy chain, putative
PF3D7_1228400_s1_547	0	conserved Plasmodium protein, unknown function
PF3D7_0714400_e1_551	0	calmodulin, putative
PF3D7_0424900_e2_552	0	Plasmodium exported protein (PHISTa), unknown function
PF3D7_0720900_e3_559	0	conserved Plasmodium protein, unknown function
PF3D7_1100100_DBL2_568	0	erythrocyte membrane protein 1, PfEMP1 (VAR)
PF3D7_1361000_572	0	arginine methyltransferase 5, putative (PRMT5)
PF3D7_1409800_e1s1_576	0	RNA binding protein Bruno, putative (HoBo)
PF3D7_1471100_e3s1_595	0	exported protein 2 (EXP2)
PF3D7_0202400_e1s2_601	0	conserved Plasmodium protein, unknown function
PF3D7_1239800_s5_630	0	conserved Plasmodium protein, unknown function
PF3D7_1335600_e2_639	0	conserved Plasmodium protein, unknown function
PF3D7_0423700_644	0	early transcribed membrane protein 4 (ETRAMP4)
PF3D7_1121100_e4_678	0	conserved Plasmodium protein, unknown function
PF3D7_0316500_e1s1_714	0	conserved Plasmodium protein, unknown function
PF3D7_1103800_e1s1_728	0	CCR4-NOT transcription complex subunit 1, putative (NOT1)
PF3D7_0422500_e1s3_739	0	pre-mRNA-splicing helicase BRR2, putative (BRR2)
PF3D7_0826100_s4_745	0	E3 ubiquitin-protein ligase, putative
PF3D7_1443400_e2_751	0	conserved Plasmodium protein, unknown function
PF3D7_0934000_e1s1_805	0	histidyl-tRNA synthetase, putative
PF3D7_1019000_e1s1_818	0	eukaryotic translation initiation factor subunit eIF2A, putative
PF3D7_1007700_e1s1_819	0	transcription factor with AP2 domain(s) (ApiAP2)
PF3D7_1003800_e1s2_890	0	U5 small nuclear ribonuclear protein, putative
PF3D7_0403600_e2_954	0	conserved Plasmodium protein, unknown function
PF3D7_0936200_e2_969	0	Plasmodium exported protein (hyp11), unknown function
PF3D7_1452800_e2_970	0	conserved Plasmodium protein, unknown function
PF3D7_0207000_e2_971	0	merozoite surface protein 4 (MSP4)
PF3D7_1408700_e3s2_986	0	conserved Plasmodium protein, unknown function
PF3D7_0819800_e4s1_1010	0	conserved Plasmodium protein, unknown function
PF3D7_0827100_s2_1042	0	translation initiation factor IF-2, putative
PF3D7_0612600_1050	0	PP-loop family protein, putative
PF3D7_0521400_1074	0	conserved Plasmodium protein, unknown function
PF3D7_0525800_e1s1_1088	0	membrane skeletal protein IMC1-related
PF3D7_0524300_1139	0	conserved Plasmodium protein, unknown function

## Sheet: Day42_ASMQ
	Overall	Ann
PF3D7_0900200_e2s1_19	100	rifin (RIF)
PF3D7_1411600_383	66.4955	GTP binding protein, putative
PF3D7_0307300_281	32.264	EB1 homolog, putative
PF3D7_0703700_e1s1_18	21.2731	conserved Plasmodium protein, unknown function
PF3D7_1138400_e1s2_459	15.6186	guanylyl cyclase (GCalpha)
PF3D7_1236100_e2s1_309	14.5696	clustered-asparagine-rich protein
PF3D7_1013500_e1s1_554	12.9829	phosphoinositide-specific phospholipase C (PI-PLC)
PF3D7_1422600_197	8.58456	conserved Plasmodium protein, unknown function
PF3D7_1328500_e1s2_1012	6.06029	alpha/beta-hydrolase, putative
PF3D7_0702400_e1s1_17	4.72349	conserved Plasmodium protein, unknown function
PF3D7_1009500_e3_631	4.43425	metallopeptidase, putative
PF3D7_0719700_650	4.10378	40S ribosomal protein S10, putative
PF3D7_1457900_e1s4_532	3.81361	conserved Plasmodium protein, unknown function
PF3D7_0212100_268	3.76232	conserved Plasmodium protein, unknown function
PF3D7_0713900_e1s4_46	3.38334	conserved Plasmodium protein, unknown function
PF3D7_1477900_e1_766	2.85454	acyl-CoA synthetase, pseudogene (ACS1b)
PF3D7_1465800_e5s2_622	2.62732	dynein beta chain, putative
PF3D7_0728900_e1_562	2.34085	RNA binding protein, putative
PF3D7_1139300_e2s3_330	2.31504	transcription factor with AP2 domain(s) (ApiAP2)
PF3D7_0725100_e1s2_1105	2.20197	conserved Plasmodium membrane protein, unknown function
PF3D7_0935600_e1_669	2.18838	gametocytogenesis-implicated protein (GIG)
PF3D7_1235300_s1_257	2.17931	CCR4-NOT transcription complex subunit 4, putative (NOT4)
PF3D7_1345400_e3_701	1.89736	conserved Plasmodium protein, unknown function
PF3D7_0203100_e1s1_434	1.83984	protein kinase, putative
PF3D7_0618900_e2_95	1.82207	N-acetylglucosamine transferase (GPI1)
PF3D7_0501100.1_e3s1_306	1.81883	heat shock protein 40, type II (HSP40)
PF3D7_1332200_e1s1_726	1.75327	conserved Plasmodium protein, unknown function
PF3D7_0207800_e2_973	1.71437	serine repeat antigen 3 (SERA3)
PF3D7_0107600_e1s2_844	1.63368	serine/threonine protein kinase, putative
PF3D7_1448300_s1_628	1.58383	conserved Plasmodium protein, unknown function
PF3D7_0516400_114	1.54569	conserved Plasmodium protein, unknown function
PF3D7_1222600_e1s2_169	1.53417	transcription factor with AP2 domain(s) (ApiAP2)
PF3D7_1329100_e3s2_1015	1.51627	myosin C (MyoC)
PF3D7_0726600_e1_963	1.50368	conserved Plasmodium protein, unknown function
PF3D7_0935600_e2_122	1.45488	gametocytogenesis-implicated protein (GIG)
PF3D7_1203500_1148	1.43059	conserved Plasmodium protein, unknown function
PF3D7_0206900.1_e1_647	1.3479	merozoite surface protein 5
PF3D7_0424100_e2_84	1.3351	reticulocyte binding protein homologue 5 (RH5)
PF3D7_0605400_976	1.33366	calcium-binding protein, putative
PF3D7_0826300_667	1.32333	SPRY domain, putative
PF3D7_0206800_49	1.2832	merozoite surface protein 2 (MSP2)
PF3D7_0511500_s3_918	1.27738	RNA pseudouridylate synthase, putative
PF3D7_1420300_849	1.18819	zinc finger protein, putative
PF3D7_1001300_e2_77	1.18588	Plasmodium exported protein (PHISTa), unknown function
PF3D7_0501100.1_e4s1_884	1.17806	heat shock protein 40, type II (HSP40)
PF3D7_1355500_962	1.15007	serine/threonine protein phosphatase (PP5)
PF3D7_0831700_e2_88	1.1467	heat shock protein 70, putative (HSP70-x)
PF3D7_1470100_e1s1_530	1.12859	conserved Plasmodium protein, unknown function
PF3D7_1364400_e1s2_735	1.12065	conserved Plasmodium protein, unknown function
PF3D7_1035200_140	1.12036	S-antigen
PF3D7_1211900_e1s1_614	1.09146	non-SERCA-type Ca2 -transporting P-ATPase (ATP4)
PF3D7_1023100_e1s6_428	1.06836	dynein heavy chain, putative
PF3D7_0324100_e2_75	1.02037	Pfmc-2TM Maurer's cleft two transmembrane protein (MC-2TM)
PF3D7_0723900_e1s2_415	1.00009	conserved Plasmodium protein, unknown function
PF3D7_1311800_e1s1_607	0.998865	M1-family alanyl aminopeptidase (M1AAP)
PF3D7_1322000_e1_209	0.992284	adenosine-diphosphatase, putative
PF3D7_1360400_367	0.98514	conserved Plasmodium protein, unknown function
PF3D7_0103400_e1s1_1025	0.982913	zinc-carboxypeptidase, putative
PF3D7_1011300_852	0.977074	conserved Plasmodium membrane protein, unknown function
PF3D7_1107800_e1s1_696	0.967618	transcription factor with AP2 domain(s) (ApiAP2)
PF3D7_1410400_e1s1_35	0.951109	rhoptry-associated protein 1 (RAP1)
PF3D7_0727200_381	0.94355	cysteine desulfurase, putative (NFS)
PF3D7_0826100_s2_825	0.895812	E3 ubiquitin-protein ligase, putative
PF3D7_1350900_832	0.886221	transcription factor with AP2 domain(s) (ApiAP2)
PF3D7_0907200_e1s1_1022	0.882636	GTPase activator, putative
PF3D7_1453700_e2s1_414	0.870931	co-chaperone p23 (P23)
PF3D7_1429500_105	0.869282	diphthamide synthesis protein, putative
PF3D7_1001800_e2_398	0.848856	Plasmodium exported protein (PHISTc), unknown function
PF3D7_0102500_e1s2_34	0.844499	erythrocyte binding antigen-181 (EBA181)
PF3D7_0102600_e2_217	0.841375	serine/threonine protein kinase, FIKK family (FIKK1)
PF3D7_0408700_e3s1_430	0.832301	perforin like protein 1 (SPECT2)
PF3D7_0409100_e2_494	0.805728	U4/U6 small nuclear ribonucleoprotein PRP31, putative (PRPF31)
PF3D7_0806800_e1s1_801	0.785467	vacuolar proton translocating ATPase subunit A, putative
PF3D7_1218700_851	0.771316	conserved Plasmodium protein, unknown function
PF3D7_1126000_e1s1_895	0.771084	threonyl-tRNA synthetase,Threonine--tRNA ligase (ThrRS)
PF3D7_0318200_e1s2_439	0.765414	DNA-directed RNA polymerase II, putative
PF3D7_0935900_e2s1_24	0.752694	ring-exported protein 1 (REX1)
PF3D7_1015100_80	0.739602	conserved protein, unknown function
PF3D7_0206000_s2_764	0.712949	DNA repair endonuclease, putative
PF3D7_1451500_109	0.691303	conserved Plasmodium protein, unknown function
PF3D7_0509400_e1s1_926	0.681668	RNA polymerase I (RNAPI)
PF3D7_1136200_e5_385	0.681335	conserved Plasmodium protein, unknown function
PF3D7_0620400_958	0.679276	merozoite surface protein 10 (MSP10)
PF3D7_1335100_338	0.678397	merozoite surface protein 7 (MSP7)
PF3D7_0912500_e2_944	0.671254	conserved Plasmodium protein, unknown function
PF3D7_1149000_e1s4_336	0.665458	antigen 332, DBL-like protein (Pf332)
PF3D7_0402100_e2s1_985	0.65459	Plasmodium exported protein (PHISTb), unknown function
PF3D7_1436400_e1s1_177	0.640021	conserved Plasmodium protein, unknown function
PF3D7_1021700_e2s2_1096	0.638218	conserved Plasmodium membrane protein, unknown function
PF3D7_0707800_e1s1_837	0.63339	RAP protein, putative
PF3D7_0521900_e2s2_1108	0.626816	conserved Plasmodium protein, unknown function
PF3D7_0203200_483	0.623444	conserved Plasmodium protein, unknown function
PF3D7_0907700_e1s1_26	0.604387	subunit of proteaseome activator complex, putative
PF3D7_1328300_e1_360	0.591679	conserved Plasmodium protein, unknown function
PF3D7_0216200_e1_305	0.588281	conserved Plasmodium protein, unknown function
PF3D7_0113200_e2_1065	0.583646	Plasmodium exported protein, unknown function
PF3D7_1419400_e1s1_229	0.583285	conserved Plasmodium membrane protein, unknown function
PF3D7_1117500_282	0.580845	tyrosine-tRNA ligase, putative
PF3D7_0926400_e2_193	0.577205	monocarboxylate transporter, putative
PF3D7_0730200_e4_280	0.574372	adapter-related protein, putative
PF3D7_0826100_s1_744	0.573479	E3 ubiquitin-protein ligase, putative
PF3D7_1368800_e1s1_1109	0.565896	DNA repair endonuclease, putative
PF3D7_0207000_e2_971	0.561218	merozoite surface protein 4 (MSP4)
PF3D7_1243700_660	0.555071	ubiquitin conjugating enzyme E2, putative
PF3D7_0628200_s2_73	0.55073	protein kinase PK4 (PK4)
PF3D7_0524300_1139	0.55069	conserved Plasmodium protein, unknown function
PF3D7_1036500_411	0.54955	probable protein, unknown function
PF3D7_1221600_196	0.521283	conserved Plasmodium protein, unknown function
PF3D7_1249100_e2_549	0.517619	conserved Plasmodium protein, unknown function
PF3D7_1439100_e2s2_712	0.495601	DEAD/DEAH box helicase, putative
PF3D7_0819600_e2_401	0.493571	conserved Plasmodium protein, unknown function
PF3D7_1100800_e2_934	0.493511	Pfmc-2TM Maurer's cleft two transmembrane protein (MC-2TM)
PF3D7_0931300_1030	0.484624	asparagine-rich antigen, putative
PF3D7_1417200_e1s1_905	0.484101	NOT family protein, putative
PF3D7_1364400_e1s4_827	0.482768	conserved Plasmodium protein, unknown function
PF3D7_0216700.1_e6_100	0.477558	conserved Plasmodium protein, unknown function
PF3D7_1229300_396	0.475325	conserved Plasmodium protein, unknown function
PF3D7_0515600_e1s1_983	0.467593	conserved Plasmodium protein, unknown function
PF3D7_1015300_e1s1_223	0.461744	methionine aminopeptidase 1b, putative (MetAP1b)
PF3D7_0808600_e1s2_447	0.456434	erythrocyte membrane protein 1, PfEMP1 (VAR)
PF3D7_1249800_e1s3_335	0.45462	conserved Plasmodium protein, unknown function
PF3D7_0933500_s1_754	0.453085	conserved Plasmodium protein, unknown function
PF3D7_1408700_e1s3_244	0.452571	conserved Plasmodium protein, unknown function
PF3D7_0804500_e2s3_186	0.445426	conserved Plasmodium membrane protein, unknown function
PF3D7_0205600_665	0.444193	conserved Plasmodium protein, unknown function
PF3D7_1358500_953	0.443756	zinc finger protein, putative
PF3D7_1252700_e2_473	0.440145	Plasmodium exported protein (PHISTb), unknown function
PF3D7_1433500_e1s1_322	0.438195	DNA topoisomerase II, putative
PF3D7_1032700_92	0.434293	conserved Plasmodium protein, unknown function
PF3D7_1241900_96	0.430819	Tetratricopeptide repeat protein, putative
PF3D7_1023100_e1s4_40	0.42999	dynein heavy chain, putative
PF3D7_0310200_e1s3_913	0.428547	phd finger protein, putative
PF3D7_1465800_e4s2_1028	0.425342	dynein beta chain, putative
PF3D7_0618700_e1_113	0.423779	transport protein particle (TRAPP) component, putative
PF3D7_0825700_70	0.423577	conserved Plasmodium protein, unknown function
PF3D7_1122900_e2s2_624	0.422235	dynein heavy chain, putative
PF3D7_0425400_e2_681	0.418111	Plasmodium exported protein (PHISTa), unknown function
PF3D7_0407700_e2s2_619	0.413763	conserved Plasmodium protein, unknown function
PF3D7_1335300_e1s1_311	0.41151	reticulocyte binding protein 2 homologue b (RH2b)
PF3D7_0527200_e2s1_30	0.404842	ubiquitin carboxyl-terminal hydrolase, putative
PF3D7_0724700_e2s2_146	0.40251	conserved Plasmodium protein, unknown function
PF3D7_1348800_e1_116	0.398423	E1-E2 ATPase, putative
PF3D7_1102500_e2s1_600	0.397522	Plasmodium exported protein (PHISTb), unknown function (GEXP02)
PF3D7_0313800_e5_87	0.395228	conserved Plasmodium protein, unknown function
PF3D7_0303200_e2s2_443	0.391723	HAD superfamily protein, putative
PF3D7_1404900_e1s1_703	0.388197	conserved Plasmodium protein, unknown function
PF3D7_1331000_274	0.385822	protein kinase, putative
PF3D7_0316500_e1s1_714	0.384041	conserved Plasmodium protein, unknown function
PF3D7_1004200_e2s1_527	0.374568	conserved Plasmodium membrane protein, unknown function
PF3D7_1149000_e1s6_906	0.374237	antigen 332, DBL-like protein (Pf332)
PF3D7_0816600_e1s2_505	0.37276	ClpB protein, putative (ClpB1)
PF3D7_0301700_e2s1_307	0.371709	Plasmodium exported protein, unknown function
PF3D7_1107800_e2s1_249	0.371489	transcription factor with AP2 domain(s) (ApiAP2)
PF3D7_1118600_1121	0.370957	histone acetyltransferase, putative (MYST)
PF3D7_1212100_205	0.369986	peripheral plastid protein 1, putative (PPP1)
PF3D7_1330800_e2s1_225	0.363627	conserved Plasmodium protein, unknown function
PF3D7_1320800_e3_928	0.36224	dihydrolipamide succinyltransferase component of 2-oxoglutarate dehydrogenase complex
PF3D7_1033200_e1s1_893	0.359753	early transcribed membrane protein 10.2 (ETRAMP10.2)
PF3D7_0506900_394	0.358866	rhomboid protease ROM4 (ROM4)
PF3D7_1149500_e3_982	0.358418	ring-infected erythrocyte surface antigen 2, pseudogene (RESA2)
PF3D7_0300100_DBL2_279	0.356766	erythrocyte membrane protein 1, PfEMP1 (VAR)
PF3D7_0724200_948	0.356365	immunoglobulin-binding protein 1-related, putative
PF3D7_1227300_e1s2_811	0.354761	conserved Plasmodium protein, unknown function
PF3D7_0219600_e1s1_158	0.354341	replication factor C subunit 1, putative
PF3D7_1349500_e1s4_835	0.344676	conserved Plasmodium protein, unknown function
PF3D7_1401300_e2_90	0.340883	aminopeptidase, putative
PF3D7_0823300_72	0.339726	histone acetyltransferase GCN5 (GCN5)
PF3D7_0323600_e1_548	0.33507	conserved Plasmodium protein, unknown function
PF3D7_0108300_s1_65	0.331807	conserved Plasmodium protein, unknown function
PF3D7_0207000_e1_53	0.32987	merozoite surface protein 4 (MSP4)
PF3D7_1035700_e1s1_32	0.323584	duffy binding-like merozoite surface protein (DBLMSP)
PF3D7_0615800_e2_685	0.322859	conserved Plasmodium protein, unknown function
PF3D7_1142700_571	0.320404	conserved protein, unknown function
PF3D7_1406300_771	0.314262	glycerophodiester phosphodiesterase, putative
PF3D7_1116400_194	0.311741	ER membrane protein Sec12 (SEC12)
PF3D7_1106300_e2_964	0.3117	exonuclease, putative
PF3D7_1115200_e2_795	0.310999	SET domain protein, putative (SET7)
PF3D7_1002100_e2_672	0.310263	PF70 protein (PF70)
PF3D7_1419200_e1s1_408	0.308249	conserved Plasmodium protein, unknown function
PF3D7_1205500_e1s2_327	0.306164	zinc finger protein, putative
PF3D7_0819800_e15s1_308	0.303611	conserved Plasmodium protein, unknown function
PF3D7_0207700_e4_412	0.30111	serine repeat antigen 4 (SERA4)
PF3D7_1018300_e1s1_337	0.299993	conserved Plasmodium protein, unknown function
PF3D7_1300300_e1s2_421	0.298919	erythrocyte membrane protein 1, PfEMP1 (VAR)
PF3D7_0404800_e1_85	0.297364	conserved Plasmodium protein, unknown function
PF3D7_1100100_CIDR2_285	0.294694	erythrocyte membrane protein 1, PfEMP1 (VAR)
PF3D7_1307400_e1_272	0.294329	conserved Plasmodium protein, unknown function
PF3D7_1371900_e2_102	0.294206	Plasmodium exported protein, unknown function
PF3D7_0630400_762	0.293295	conserved Plasmodium protein, unknown function
PF3D7_0409100_e2_259	0.286909	U4/U6 small nuclear ribonucleoprotein PRP31, putative (PRPF31)
PF3D7_1221400_e1s1_512	0.282947	membrane skeletal protein, putative (ALV3)
PF3D7_0614400_104	0.279799	conserved Plasmodium protein, unknown function
PF3D7_1461800_e1s1_450	0.277051	conserved Plasmodium protein, unknown function
PF3D7_0906400_e1s1_911	0.27494	dynein light intermediate chain 2, cytosolic
PF3D7_0823500_380	0.272534	membrane skeletal protein IMC1-related
PF3D7_1252400_e4s2_706	0.272027	reticulocyte binding protein homologue 3, pseudogene (RH3)
PF3D7_0407800_e1s2_907	0.269038	conserved Plasmodium protein, unknown function
PF3D7_1035200_989	0.266309	S-antigen
PF3D7_1233400_e1_1051	0.264613	conserved Plasmodium membrane protein, unknown function
PF3D7_0602200_e1_978	0.261408	MYND finger protein, putative
PF3D7_1435500_479	0.261203	conserved Plasmodium protein, unknown function
PF3D7_0933100_e4_387	0.260716	conserved Plasmodium protein, unknown function
PF3D7_1368800_e1s2_1017	0.258125	DNA repair endonuclease, putative
PF3D7_1126400_e2_680	0.257405	large ribosomal subunit processing factor, putative
PF3D7_1108900_482	0.248298	conserved Plasmodium protein, unknown function
PF3D7_1445600_e4_188	0.247983	erythrocyte membrane-like protein
PF3D7_0203900_563	0.247308	5'-3' exonuclease, N-terminal resolvase-like domain, putative
PF3D7_1131600_s2_1115	0.247227	conserved Plasmodium protein, unknown function
PF3D7_0502400_208	0.2466	ring-stage membrane protein 1,merozoite surface protein 8 (MSP8)
PF3D7_1349900_261	0.246134	conserved Plasmodium protein, unknown function
PF3D7_1223600_e1_181	0.245991	conserved Plasmodium protein, unknown function
PF3D7_1328500_e1s1_711	0.245651	alpha/beta-hydrolase, putative
PF3D7_1324300_e1s5_544	0.244171	conserved Plasmodium membrane protein, unknown function
PF3D7_1329600_560	0.243931	conserved Plasmodium protein, unknown function
PF3D7_0827800_e1s3_287	0.243313	SET domain protein, putative (SET3)
PF3D7_0509700_e4s1_1080	0.241241	conserved Plasmodium protein, unknown function
PF3D7_1008100_s1_919	0.23976	conserved Plasmodium protein, unknown function
PF3D7_0519500_e1s3_815	0.238098	carbon catabolite repressor protein 4, putative (CCR4)
PF3D7_1125700_e6_666	0.238008	kelch protein, putative
PF3D7_1335700_e2_990	0.237403	conserved Plasmodium protein, unknown function
PF3D7_1008100_s3_460	0.23722	conserved Plasmodium protein, unknown function
PF3D7_1021700_e1s3_438	0.236886	conserved Plasmodium membrane protein, unknown function
PF3D7_1007700_e1s1_819	0.236065	transcription factor with AP2 domain(s) (ApiAP2)
PF3D7_0830500_e2_955	0.235177	tryptophan/threonine-rich antigen (TryThrA)
PF3D7_1017300.1._e2_382	0.230522	NA
PF3D7_0304600_916	0.230481	circumsporozoite (CS) protein (CSP)
PF3D7_1215400_94	0.228812	conserved Plasmodium protein, unknown function
PF3D7_1118200_e1s1_1119	0.228091	heat shock protein 90, putative
PF3D7_0314300_e1_277	0.225421	DER1-like protein (Der1-2)
PF3D7_0215600_850	0.224939	conserved Plasmodium protein, unknown function
PF3D7_1129100_e1s1_887	0.223892	parasitophorous vacuolar protein 1 (PV1)
PF3D7_1221000_e1s1_529	0.223493	histone-lysine N-methyltransferase, H3 lysine-4 specific (SET10)
PF3D7_1122300_1048	0.223432	conserved Plasmodium protein, unknown function
PF3D7_1416600_e1s1_528	0.223206	conserved Plasmodium protein, unknown function
PF3D7_1110200_e1s1_523	0.222882	pre-mRNA-processing factor 6, putative (PRPF6)
PF3D7_1434500_e2s5_541	0.220973	dynein-related AAA-type ATPase, putative
PF3D7_1313600_e1s2_236	0.219611	conserved Plasmodium protein, unknown function
PF3D7_1466200_e1s3_324	0.217694	conserved Plasmodium protein, unknown function
PF3D7_0914700_570	0.217558	transporter, putative
PF3D7_1438000_e1s1_235	0.216115	eukaryotic translation initiation factor eIF2A, putative
PF3D7_1140800_676	0.215037	conserved Plasmodium protein, unknown function
PF3D7_1478000_e2_979	0.209897	Plasmodium exported protein (PHISTa), unknown function (GEXP17)
PF3D7_0220000_e2s1_932	0.207131	liver stage antigen 3 (LSA3)
PF3D7_0501200_e2_54	0.20678	parasite-infected erythrocyte surface protein (PIESP2)
PF3D7_1036900_e1s2_130	0.206618	conserved Plasmodium protein, unknown function
PF3D7_0908800_e1_206	0.206552	transporter, putative
PF3D7_1020300_e1s1_707	0.206058	cytoplasmic dynein intermediate chain, putative
PF3D7_1035600_659	0.203077	merozoite surface protein (H101)
PF3D7_0721100_171	0.202069	conserved Plasmodium protein, unknown function
PF3D7_1023100_e1s3_329	0.201418	dynein heavy chain, putative
PF3D7_1423700_e1s1_613	0.20056	conserved Plasmodium protein, unknown function
PF3D7_0207000_e1_358	0.197746	merozoite surface protein 4 (MSP4)
PF3D7_0113800_e2_789	0.196333	DBL containing protein, unknown function
PF3D7_0804800_e1s1_1003	0.195603	peptidyl-prolyl cis-trans isomerase (CYP24)
PF3D7_1024400_e1_191	0.195291	conserved Plasmodium protein, unknown function
PF3D7_0809200_e1s2_725	0.194565	asparagine-rich antigen Pfa55-14 (pfa55-14)
PF3D7_0933900_e4_646	0.194221	conserved Plasmodium protein, unknown function
PF3D7_0419700_699	0.19379	apical merozoite protein (Pf34)
PF3D7_1466400_e1s1_621	0.190122	transcription factor with AP2 domain(s) (ApiAP2)
PF3D7_1122900_e1s1_534	0.188841	dynein heavy chain, putative
PF3D7_1310700_e1s1_702	0.188479	conserved Plasmodium protein, unknown function
PF3D7_1252400_e3s1_117	0.187538	reticulocyte binding protein homologue 3, pseudogene (RH3)
PF3D7_1333800_e1s1_695	0.187501	conserved Plasmodium protein, unknown function
PF3D7_1110200_e2s1_413	0.186788	pre-mRNA-processing factor 6, putative (PRPF6)
PF3D7_1452000_s1_642	0.185998	rhoptry neck protein 2 (RON2)
PF3D7_0913200_999	0.185222	elongation factor 1-beta (EF-1beta)
PF3D7_0930800_e2s2_167	0.185061	conserved Plasmodium membrane protein, unknown function
PF3D7_0704300_s1_59	0.184593	conserved Plasmodium membrane protein, unknown function
PF3D7_0220000_e2s2_643	0.18442	liver stage antigen 3 (LSA3)
PF3D7_1028500_e3_862	0.183683	conserved Plasmodium protein, unknown function
PF3D7_1459100_565	0.182206	conserved Plasmodium protein, unknown function
PF3D7_0315400_365	0.179934	conserved Plasmodium protein, unknown function
PF3D7_1346400_e1s4_638	0.178577	conserved Plasmodium protein, unknown function
PF3D7_1133200_e1s2_132	0.178507	conserved Plasmodium protein, unknown function
PF3D7_0702300_e2_960	0.177081	sporozoite threonine and asparagine-rich protein (STARP)
PF3D7_0917900_e2_1144	0.175627	heat shock protein 70 (Hsp70-2)
PF3D7_0815500_e3_661	0.173573	conserved Plasmodium protein, unknown function
PF3D7_1409800_e1s1_576	0.172961	RNA binding protein Bruno, putative (HoBo)
PF3D7_0424800_e2_656	0.171709	Plasmodium exported protein (PHISTb), unknown function
PF3D7_1304300_652	0.171494	conserved Plasmodium protein, unknown function
PF3D7_1208100_e3s1_444	0.170326	conserved Plasmodium protein, unknown function
PF3D7_0620500_785	0.169223	cleavage stimulation factor subunit 1-like protein, putative
PF3D7_0629700_e1s5_637	0.169187	SET domain protein, putative (SET1)
PF3D7_1001700_e2_393	0.16913	Plasmodium exported protein (PHISTc), unknown function
PF3D7_0917500_e1s1_733	0.168426	conserved Plasmodium protein, unknown function
PF3D7_1405500_663	0.167915	conserved Plasmodium protein, unknown function
PF3D7_1201200_e2_1128	0.166292	Plasmodium exported protein, unknown function
PF3D7_1143600_271	0.163835	conserved Plasmodium protein, unknown function
PF3D7_0513200_e2s3_36	0.163385	conserved Plasmodium protein, unknown function
PF3D7_0313600_e5_782	0.16337	conserved Plasmodium protein, unknown function
PF3D7_1208100_e1_946	0.163203	conserved Plasmodium protein, unknown function
PF3D7_0826100_s8_341	0.161959	E3 ubiquitin-protein ligase, putative
PF3D7_0827100_s1_469	0.161652	translation initiation factor IF-2, putative
PF3D7_1036400_e2s1_929	0.161493	liver stage antigen 1 (LSA1)
PF3D7_1141900_481	0.160713	inner membrane complex protein 1b, putative (IMC1b)
PF3D7_1403200_e4s2_740	0.160547	conserved Plasmodium protein, unknown function
PF3D7_1300300_CIDR1_863	0.160427	erythrocyte membrane protein 1, PfEMP1 (VAR)
PFL_0008_CIDR2_278	0.160353	PFL_0008_CIDR2
PF3D7_1030800_977	0.159555	calmodulin, putative
PF3D7_0622300_e3_573	0.159108	conserved Plasmodium protein, unknown function
PF3D7_0320500_1061	0.158272	conserved Plasmodium protein, unknown function
PF3D7_0530100_e2_356	0.15823	SNARE protein, putative (SYN6)
PF3D7_1335300_e1s2_22	0.157827	reticulocyte binding protein 2 homologue b (RH2b)
PF3D7_0709900_e1s2_476	0.157576	conserved Plasmodium membrane protein, unknown function
PF3D7_0903500_e1s1_321	0.157479	conserved Plasmodium protein, unknown function
PF3D7_1319400_e1s2_149	0.157186	conserved Plasmodium protein, unknown function
PF3D7_1314200_e1s3_449	0.157183	telomerase reverse transcriptase, putative (TERT)
PF3D7_0730300_e1s2_436	0.156777	transcription factor with AP2 domain(s) (ApiAP2)
PF3D7_1448500_e1s4_729	0.156077	chloroquine resistance marker protein (CRMP)
PF3D7_1139300_e2s2_995	0.155719	transcription factor with AP2 domain(s) (ApiAP2)
PF3D7_0930800_e2s4_826	0.15555	conserved Plasmodium membrane protein, unknown function
PF3D7_1134000_e1s1_313	0.155441	heat shock protein 70 (Hsp70-3)
PF3D7_0310300_e1s2_1092	0.155029	phosphoglycerate mutase, putative
PF3D7_1315300_e2_379	0.154384	conserved Plasmodium protein, unknown function
PF3D7_1332900_e1s1_724	0.154071	isoleucine-tRNA ligase, putative
PF3D7_1222300_e1s1_44	0.153761	endoplasmin homolog precursor, putative
PF3D7_0107300_e2_692	0.153569	probable protein, unknown function
PF3D7_0423700_644	0.153253	early transcribed membrane protein 4 (ETRAMP4)
PF3D7_1202600_e1_1053	0.1525	conserved protein, unknown function
PF3D7_1109200_e3_405	0.152393	conserved Plasmodium protein, unknown function
PF3D7_1468100_e2s1_58	0.151832	conserved Plasmodium protein, unknown function
PF3D7_1340600_e1s1_993	0.15047	RNA lariat debranching enzyme, putative (DBR1)
PF3D7_1370300_e1_357	0.149022	membrane associated histidine-rich protein (MAHRP1)
PF3D7_0518700_e1s1_331	0.148156	mRNA-binding protein PUF1 (PUF1)
PF3D7_0801000_e2s2_897	0.147545	Plasmodium exported protein (PHISTc), unknown function
PF3D7_1208100_e2s2_1099	0.147058	conserved Plasmodium protein, unknown function
PF3D7_1218300_e1s1_812	0.146354	adaptor protein subunit, putative
PF3D7_1217200_e1s1_513	0.142116	snoRNA-associated small subunit rRNA processing protein, putative
PF3D7_0915400_e1s1_807	0.141845	6-phosphofructokinase (PFK9)
PF3D7_1442700_e2s2_531	0.139495	conserved Plasmodium protein, unknown function
PF3D7_0931700_e2_564	0.139062	conserved Plasmodium protein, unknown function
PF3D7_0716300_e1s1_606	0.138979	conserved Plasmodium protein, unknown function
PF3D7_1300300_e1s1_1029	0.138826	erythrocyte membrane protein 1, PfEMP1 (VAR)
PF3D7_0904900_e1s3_1123	0.138781	Cu2 -transporting ATPase, putative (CUP)
PF3D7_0936200_e2_969	0.138648	Plasmodium exported protein (hyp11), unknown function
PF3D7_0629300_395	0.138442	phosphatidylcholine-sterol acyltransferase precursor, putative (PL)
PF3D7_1223600_e1_967	0.138073	conserved Plasmodium protein, unknown function
PF3D7_0713100_e2_364	0.138019	Pfmc-2TM Maurer's cleft two transmembrane protein (MC-2TM)
PF3D7_0206900.1_e1short_74	0.137747	merozoite surface protein 5
PF3D7_1353100_e2s1_25	0.137067	Plasmodium exported protein, unknown function
PF3D7_1476500_e2_945	0.136072	probable protein, unknown function
PF3D7_0726400_e3s1_794	0.135717	conserved Plasmodium membrane protein, unknown function
PF3D7_0707700_677	0.135439	ubiquitin-protein ligase e3, putative
PF3D7_1434500_e2s2_830	0.135121	dynein-related AAA-type ATPase, putative
PF3D7_1140700_e1s1_817	0.134188	conserved Plasmodium protein, unknown function
PF3D7_0817300_e1s3_857	0.134015	asparagine-rich antigen
PF3D7_0601100_e2_269	0.13297	Plasmodium exported protein (hyp4), unknown function
PF3D7_0904900_e1s1_362	0.132648	Cu2 -transporting ATPase, putative (CUP)
PF3D7_1025900_e1s1_816	0.131813	conserved Plasmodium protein, unknown function
PF3D7_0520200_97	0.13173	conserved Plasmodium protein, unknown function
PF3D7_1035900_959	0.13135	probable protein, unknown function
PF3D7_1472200_e1s2_1046	0.130843	histone deacetylase, putative
PF3D7_0709100_e1s1_320	0.130357	Cg1 protein
PF3D7_1001500_940	0.129921	early transcribed membrane protein 10.1 (ETRAMP10)
PF3D7_0323300_273	0.129576	conserved Plasmodium protein, unknown function
PF3D7_1142100_e1s3_252	0.129022	conserved Plasmodium protein, unknown function
PF3D7_0202500_651	0.128527	early transcribed membrane protein 2 (ETRAMP2)
PF3D7_1149200_e2s2_566	0.128091	ring-infected erythrocyte surface antigen
PF3D7_1036400_e1_935	0.126758	liver stage antigen 1 (LSA1)
PF3D7_0911300_e1s1_256	0.125091	cysteine repeat modular protein 1 (CRMP1)
PF3D7_1245600_e1s2_437	0.125038	kinesin, putative
PF3D7_0724800_e1_838	0.124913	kelch protein, putative
PF3D7_1149000_e1s1_625	0.124849	antigen 332, DBL-like protein (Pf332)
PF3D7_0302800_e1s1_27	0.123809	conserved Plasmodium protein, unknown function
PF3D7_1128100_e2_68	0.123123	cochaperone prefoldin complex subunit, putative
PF3D7_1470100_e1s2_241	0.122749	conserved Plasmodium protein, unknown function
PF3D7_0920300_e1_182	0.121678	conserved Plasmodium protein, unknown function
PF3D7_1336700_846	0.121678	conserved Plasmodium protein, unknown function
PF3D7_1024800_e2s1_810	0.120833	conserved Plasmodium protein, unknown function
PF3D7_1469600_e1s4_165	0.120674	biotin carboxylase subunit of acetyl CoA carboxylase, putative (ACC1)
PF3D7_0706100_e1_1155	0.120465	conserved Plasmodium protein, unknown function
PF3D7_1477600_e1_694	0.120176	surface-associated interspersed protein 14.1 (SURFIN 14.1) (Surf14.1)
PF3D7_0102200_e2s2_21	0.119927	ring-infected erythrocyte surface antigen (RESA)
PF3D7_1477500_e2_957	0.117661	Plasmodium exported protein (PHISTb), unknown function
PF3D7_0203600_376	0.117361	conserved Plasmodium protein, unknown function
PF3D7_1457000_e9_781	0.116795	signal peptide peptidase (SPP)
PF3D7_1401400_66	0.116692	early transcribed membrane protein 14.1 (ETRAMP14)
PF3D7_1417200_e1s5_38	0.116388	NOT family protein, putative
PF3D7_1033100_s2_634	0.116286	S-adenosylmethionine decarboxylase/ornithine decarboxylase (AdoMetDC/ODC)
PF3D7_1018300_e2s2_526	0.116259	conserved Plasmodium protein, unknown function
PF3D7_1239200_e1s2_243	0.11545	transcription factor with AP2 domain(s) (ApiAP2)
PF3D7_0728200_e2_778	0.114848	actin-like protein, putative
PF3D7_1452800_e2_970	0.114842	conserved Plasmodium protein, unknown function
PF3D7_1247500_858	0.114751	serine/threonine protein kinase, putative
PF3D7_0832300_e2_654	0.114451	Plasmodium exported protein (PHISTa-like), unknown function
PF3D7_1408400_e1s2_522	0.114407	DNA-repair helicase, putative
PF3D7_1123400_e1_342	0.114255	translation elongation factor EF-1, subunit alpha, putative
PF3D7_0404600_s3_453	0.113881	conserved Plasmodium membrane protein, unknown function
PF3D7_1321100_e3s1_618	0.113598	conserved Plasmodium protein, unknown function
PF3D7_1011800_e1s1_803	0.11343	QF122 antigen
PF3D7_0708400_e2_69	0.113419	heat shock protein 90 (HSP90)
PF3D7_0111500_e4s1_713	0.113033	UMP-CMP kinase, putative
PF3D7_1464000_e1s1_518	0.112832	YL1 nuclear protein, putative
PF3D7_0310200_e1s4_157	0.112777	phd finger protein, putative
PF3D7_1418100_s3_537	0.11218	liver specific protein 1, putative (LISP1)
PF3D7_0806500_e1s1_705	0.111856	DnaJ protein, putative
PF3D7_0532100_915	0.11181	early transcribed membrane protein 5 (ETRAMP5)
PF3D7_1149000_e1s2_245	0.111788	antigen 332, DBL-like protein (Pf332)
PF3D7_0622800_s2_763	0.111746	leucyl tRNA synthase
PF3D7_1232100_e1_179	0.111649	60 kDa chaperonin (CPN60)
PF3D7_0405400_e2s1_43	0.111596	pre-mRNA-processing-splicing factor 8, putative (PRPF8)
PF3D7_1138400_e1s5_150	0.111151	guanylyl cyclase (GCalpha)
PF3D7_0407000_491	0.110684	conserved Plasmodium protein, unknown function
PF3D7_1301400_e2_403	0.110339	Plasmodium exported protein (hyp12), unknown function
PF3D7_0409300_e1_866	0.110287	conserved Plasmodium protein, unknown function
PF3D7_1136200_e1_860	0.109838	conserved Plasmodium protein, unknown function
PF3D7_1308200_e2s2_148	0.109827	carbamoyl phosphate synthetase (cpsSII)
PF3D7_1448000_e2s1_127	0.109794	U3 snoRNA-associated small subunit rRNA processing protein, putative
PF3D7_0830600_e2_203	0.109574	Plasmodium exported protein (PHISTc), unknown function
PF3D7_0911300_e1s2_50	0.109478	cysteine repeat modular protein 1 (CRMP1)
PF3D7_1149200_e2s1_351	0.10842	ring-infected erythrocyte surface antigen
PF3D7_0220500_e2_682	0.108373	Plasmodium exported protein (hyp2), unknown function
PF3D7_0313100_e1_790	0.108116	ubiquitin-protein ligase, putative (HRD3)
PF3D7_1426100_824	0.107694	basic transcription factor 3b, putative
PF3D7_0527900_377	0.107551	RNA helicase 1
PF3D7_0908500_e18s1_145	0.107155	conserved Plasmodium protein, unknown function
PF3D7_1028700_91	0.105706	merozoite TRAP-like protein (MTRAP)
PF3D7_1431100_e1s1_503	0.104567	conserved Plasmodium protein, unknown function
PF3D7_0720900_e3_559	0.103942	conserved Plasmodium protein, unknown function
PF3D7_0711700_e2s1_28	0.103721	erythrocyte membrane protein 1, PfEMP1 (VAR)
PF3D7_1244100_e1s2_889	0.103455	conserved Plasmodium protein, unknown function
PF3D7_1008800_e1s1_141	0.103276	small subunit rRNA processing protein, putative
PF3D7_1354200_456	0.103276	inositol-polyphosphate 5-phosphatase, putative
PF3D7_1343100_410	0.102564	conserved Plasmodium protein, unknown function
PF3D7_0532300_e2s1_20	0.101173	Plasmodium exported protein (PHISTb), unknown function
PF3D7_0603100_981	0.100981	conserved Plasmodium protein, unknown function
PF3D7_1233600_e1s1_1111	0.100589	asparagine and aspartate rich protein 1 (AARP1)
PF3D7_0730800.1_e2s1_125	0.0995876	Plasmodium exported protein, unknown function
PF3D7_1471200_e1_796	0.099263	inorganic anion exchanger, inorganic anion antiporter (SulP)
PF3D7_0422100_939	0.0954826	transmembrane emp24 domain-containing protein, putative
PF3D7_1132900_110	0.0953536	glycine cleavage H protein (GCVH)
PF3D7_0302200_e1_389	0.0952762	cytoadherence linked asexual protein 3.2 (CLAG3.2)
PF3D7_0307700_e3s2_716	0.0951204	conserved Plasmodium protein, unknown function
PF3D7_0302500_e1s1_315	0.0942313	cytoadherence linked asexual protein 3.1 (CLAG3.1)
PF3D7_1358000_e2s1_455	0.0939332	patatin-like phospholipase, putative
PF3D7_1408700_e3s1_1101	0.0939232	conserved Plasmodium protein, unknown function
PF3D7_0902200_e2_497	0.0937803	serine/threonine protein kinase, FIKK family (FIKK9.3)
PF3D7_1442400_e1s3_409	0.0932344	conserved Plasmodium protein, unknown function
PF3D7_0801700_e1_500	0.0929208	sentrin-specific protease 2, putative (SENP2)
PF3D7_0823300_e1s2_896	0.0928638	histone acetyltransferase GCN5 (GCN5)
PF3D7_0203100_e2s2_441	0.0928207	protein kinase, putative
PF3D7_1405400_e4s1_118	0.0927245	DNA mismatch repair protein, putative
PF3D7_1008600_842	0.0923893	zinc finger C-x8-C-x5-C-x3-H type, putative
PF3D7_0705000_e1s1_755	0.0921275	methyltransferase, putative
PF3D7_0304000_e4s1_900	0.0918173	inner membrane complex protein 1a, putative (IMC1a)
PF3D7_0522400_e3s6_741	0.0917292	conserved Plasmodium protein, unknown function
PF3D7_1347700_e1_374	0.0914671	ethanolamine-phosphate cytidylyltransferase, putative (ECT)
PF3D7_1001600_e2_972	0.0914643	alpha/beta hydrolase, putative
PF3D7_0110000_653	0.0913335	conserved Plasmodium protein, unknown function
PF3D7_1021200_501	0.0912584	conserved Plasmodium protein, unknown function
PF3D7_0920700_429	0.0912006	conserved Plasmodium protein, unknown function
PF3D7_1202300_e3s2_806	0.0911623	dynein heavy chain, putative
PF3D7_1356300_e2_477	0.0910309	ubiquitin conjugating enzyme, putative
PF3D7_0508300_760	0.0907911	triose phosphate transporter (oTPT)
PF3D7_0110500_e1s2_901	0.0900198	bromodomain protein, putative
PF3D7_0202000_e2s1_697	0.0899705	knob-associated histidine-rich protein (KAHRP)
PF3D7_1311000_189	0.0899649	conserved Plasmodium protein, unknown function
PF3D7_0321600_e1_855	0.0899118	ATP-dependent RNA helicase, putative
PF3D7_1364400_e1s1_458	0.0898914	conserved Plasmodium protein, unknown function
PF3D7_1212900_e1s1_126	0.0896471	bromodomain protein, putative
PF3D7_0207400_e2_99	0.0896436	serine repeat antigen 7 (SERA7)
PF3D7_0911100_e1s1_717	0.0895783	conserved Plasmodium protein, unknown function
PF3D7_0715800_773	0.0893263	drug/metabolite exporter, drug/metabolite transporter
PF3D7_0529400.1_e1s1_829	0.0891435	conserved Plasmodium protein, unknown function
PF3D7_0529800_e1_506	0.0890584	conserved Plasmodium protein, unknown function
PF3D7_0404800_e1_1133	0.088987	conserved Plasmodium protein, unknown function
PF3D7_0621900_861	0.0889649	conserved Plasmodium protein, unknown function
PF3D7_1247100_e2_942	0.0888174	conserved Plasmodium protein, unknown function
PF3D7_0710400_172	0.0880518	nucleotide excision repair protein, putative
PF3D7_1036000_658	0.0880428	merozoite surface protein (MSP11)
PF3D7_1462400_e1s2_427	0.0871274	conserved Plasmodium protein, unknown function
PF3D7_0627300_956	0.0868994	c3h4-type ring finger protein, putative
PF3D7_0730900_e2s1_525	0.0867518	Plasmodium exported protein, unknown function
PF3D7_0831000_e2_1069	0.0867518	Plasmodium exported protein (PHISTb), unknown function (GEXP09)
PF3D7_0903500_e1s2_994	0.086681	conserved Plasmodium protein, unknown function
PF3D7_1443400_e2_751	0.0860909	conserved Plasmodium protein, unknown function
PF3D7_1238800_e1s1_1014	0.0859773	acyl-CoA synthetase, PfACS11 (ACS11)
PF3D7_1337500_e1s1_159	0.0859256	conserved Plasmodium protein, unknown function
PF3D7_1440500_e1s1_445	0.0856079	allantoicase, putative
PF3D7_1215900_673	0.0852647	conserved Plasmodium membrane protein, unknown function (PfSR10)
PF3D7_1002500_e1_933	0.0852647	conserved Plasmodium protein, unknown function
PF3D7_0823800_247	0.0849814	DnaJ protein, putative
PF3D7_0108300_s3_931	0.0849814	conserved Plasmodium protein, unknown function
PF3D7_1228600_e1s1_908	0.0844985	merozoite surface protein 9 (MSP9)
PF3D7_1008000_s3_545	0.0839117	histone deacetylase, putative
PF3D7_0500800_e2s1_610	0.0838919	mature parasite-infected erythrocyte surface antigen,erythrocyte membrane protein 2 (MESA)
PF3D7_1323500_777	0.0838919	plasmepsin V (PMV)
PF3D7_1436300_e1s1_48	0.082786	translocon component PTEX150 (PTEX150)
PF3D7_0106000_219	0.0826208	conserved Plasmodium protein, unknown function
PF3D7_1229100_s3_1045	0.0826208	ABC transporter, (CT family) (MRP2)
PF3D7_1011700_1068	0.0826208	DNA repair protein RAD23, putative
PF3D7_1324800_e1_492	0.0812222	dihydrofolate synthase/folylpolyglutamate synthase (DHFS-FPGS)
PF3D7_1118600_207	0.0806659	histone acetyltransferase, putative (MYST)
PF3D7_1008000_s2_1031	0.0802602	histone deacetylase, putative
PF3D7_0423400_839	0.0780471	asparagine-rich protein (AARP)
PF3D7_0219700_e2_980	0.0764387	Plasmodium exported protein (PHISTc), unknown function (GEXP20)
PF3D7_0220700_e2_689	0.0763448	Plasmodium exported protein (hyp9), unknown function
PF3D7_0509600_e2_283	0.0718014	asparagine-tRNA ligase, putative
PF3D7_1146000_776	0.071738	nucleolar preribosomal assembly protein, putative
PF3D7_1227300_e1s1_1100	0.0714798	conserved Plasmodium protein, unknown function
PF3D7_0816200_688	0.0714044	vacuolar protein-sorting protein VPS2, putative
PF3D7_1322300_e3s2_516	0.0713998	translation initiation factor EIF-2B subunit related
PF3D7_0714500_1060	0.0713399	transcription elongation factor s-II, putative
PF3D7_1203700_e3_920	0.0712099	nucleosome assembly protein (NAPL)
PF3D7_0629700_e1s1_163	0.0711474	SET domain protein, putative (SET1)
PF3D7_0601700_e2_1137	0.0711104	Plasmodium exported protein (PHISTa), unknown function, pseudogene
PF3D7_0422500_e1s1_1120	0.0710681	pre-mRNA-splicing helicase BRR2, putative (BRR2)
PF3D7_1469600_e1s3_467	0.0710415	biotin carboxylase subunit of acetyl CoA carboxylase, putative (ACC1)
PF3D7_0719000_687	0.0704894	conserved Plasmodium protein, unknown function
PF3D7_1110100_e1_1084	0.0703028	conserved Plasmodium protein, unknown function
PF3D7_1021700_e2s1_237	0.0701277	conserved Plasmodium membrane protein, unknown function
PF3D7_0824400_493	0.0699762	nucleoside transporter 2 (NT2)
PF3D7_0905400_e7s1_603	0.0698871	high molecular weight rhoptry protein 3 (RhopH3)
PF3D7_1207400_e2_561	0.0698605	conserved Plasmodium protein, unknown function
PF3D7_1254100_e2s1_596	0.0698146	stevor (stevor)
PF3D7_1113600_1131	0.0698015	Rpr2, RNAse P, putative
PF3D7_0523800_1149	0.0696912	transporter, putative
PF3D7_1202600_e2s1_1132	0.0696908	conserved protein, unknown function
PF3D7_0220600_e2_392	0.0696274	Plasmodium exported protein (hyp9), unknown function
PF3D7_0801000_e2s1_23	0.0696183	Plasmodium exported protein (PHISTc), unknown function
PF3D7_0401900_107	0.0695077	acyl-CoA synthetase (ACS6)
PF3D7_1346000_e2_657	0.0694408	conserved Plasmodium protein, unknown function
PF3D7_1114000_e1_1135	0.0693221	dynein light chain type 2, putative
PF3D7_1301700_e2_111	0.0692362	Plasmodium exported protein (hyp8), unknown function (GEXP07)
PF3D7_1202300_s1_515	0.0691536	dynein heavy chain, putative
PF3D7_1025200_16	0.0690887	conserved Plasmodium protein, unknown function
PF3D7_0207100_s1_464	0.0690474	conserved Plasmodium protein, unknown function
PF3D7_1209400_e1s1_325	0.0688274	conserved Plasmodium protein, unknown function
PF3D7_0303700_e1s1_598	0.0688039	dihydrolipoamide acyltransferase, putative
PF3D7_1469800_e3_478	0.0687379	conserved Plasmodium protein, unknown function
PF3D7_1036400_e2s2_62	0.0686461	liver stage antigen 1 (LSA1)
PF3D7_1012700_e1s2_63	0.0685101	protein phosphatase, putative
PF3D7_0625800_384	0.0682748	conserved Plasmodium protein, unknown function
PF3D7_1302000_e2_78	0.0681795	Plasmodium exported protein, unknown function
PF3D7_1125800_e1_375	0.0675988	kelch protein, putative
PF3D7_0813400_e2s1_224	0.0675352	conserved Plasmodium protein, unknown function
PF3D7_1349600_e2_121	0.067513	conserved Plasmodium protein, unknown function
PF3D7_0905300_s6_173	0.0673876	dynein heavy chain, putative
PF3D7_0512200_508	0.0673876	glutathione synthetase (GS)
PF3D7_0632800._CIDR1_856	0.0673876	NA
PF3D7_1208100_e3s2_804	0.0673215	conserved Plasmodium protein, unknown function
PF3D7_1132300_112	0.0672769	nucleic acid binding protein, putative
PF3D7_1233600_e1s3_451	0.0671627	asparagine and aspartate rich protein 1 (AARP1)
PF3D7_0711000_e1s1_1023	0.0671458	AAA family ATPase, CDC48 subfamily (Cdc48)
PF3D7_0707800_e1s2_922	0.0669228	RAP protein, putative
PF3D7_0402200_e1s1_902	0.0667576	surface-associated interspersed gene 4.1, pseudogene (SURFIN4.1) (SURF4.1)
PF3D7_1137900_e2_115	0.0666664	conserved Plasmodium protein, unknown function
PF3D7_1450500_e3s2_230	0.0666664	conserved Plasmodium protein, unknown function
PF3D7_0219900_e2_645	0.066316	Plasmodium exported protein, unknown function
PF3D7_0731500_e1s1_185	0.0660966	erythrocyte binding antigen-175 (EBA175)
PF3D7_0713900_e1s3_822	0.0658606	conserved Plasmodium protein, unknown function
PF3D7_1111300_841	0.0657789	SNARE protein, putative (GS27)
PF3D7_1303800_e1s3_1112	0.0657622	conserved Plasmodium protein, unknown function
PF3D7_0812700_847	0.0655882	RNA-binding protein (U1 snRNP-like), putative
PF3D7_1351800.1_941	0.0654357	conserved Plasmodium protein, unknown function
PF3D7_0612600_1050	0.0654357	PP-loop family protein, putative
PF3D7_0815500_e1_372	0.0654357	conserved Plasmodium protein, unknown function
PF3D7_0529400.1_e9s1_791	0.0654357	conserved Plasmodium protein, unknown function
PF3D7_0305500_e1s1_246	0.0650908	conserved Plasmodium protein, unknown function
PF3D7_0422500_e1s2_831	0.0650908	pre-mRNA-splicing helicase BRR2, putative (BRR2)
PF3D7_0300100_CIDR2_864	0.0643524	erythrocyte membrane protein 1, PfEMP1 (VAR)
PF3D7_0108700_e1s2_888	0.0642189	secreted ookinete protein, putative (PSOP24)
PF3D7_0317700_e1s1_1110	0.0641438	CPSF (cleavage and polyadenylation specific factor), subunit A, putative
PF3D7_0209800_e2_555	0.0639862	ATP-dependent RNA helicase UAP56 (UAP56)
PF3D7_1121800_s3_352	0.0638934	petidase, M16 family
PF3D7_1454200_s2_474	0.0620574	conserved Plasmodium protein, unknown function
PF3D7_0525300_485	0.0588181	conserved Plasmodium protein, unknown function
PF3D7_1329100_e3s3_814	0.0481094	myosin C (MyoC)
PF3D7_1216900_e1s1_823	0.0479182	DNA-binding chaperone, putative
PF3D7_1458000_200	0.0478877	cysteine proteinase falcipain 1
PF3D7_1312700_1067	0.0478877	probable protein, unknown function
PF3D7_1408700_e3s2_986	0.0478799	conserved Plasmodium protein, unknown function
PF3D7_0632800._CIDR2_1152	0.0478549	NA
PF3D7_1248700_s2_909	0.0478283	conserved Plasmodium protein, unknown function
PF3D7_0731800_784	0.0477692	alpha/beta hydrolase, putative (GEXP08)
PF3D7_0402000_e1_1056	0.0477692	Plasmodium exported protein (PHISTa), unknown function
PF3D7_1454200_s1_468	0.0477135	conserved Plasmodium protein, unknown function
PF3D7_1005100_e1s2_1091	0.0477135	conserved protein, unknown function
PF3D7_1139300_e2s1_129	0.0476958	transcription factor with AP2 domain(s) (ApiAP2)
PF3D7_0205900_e2_175	0.0476958	proteasome 26S regulatory subunit, putative
PF3D7_0419500_662	0.0476958	conserved Plasmodium membrane protein, unknown function
PF3D7_0616200_e1_671	0.047685	Ndc80 homologue, putative
PF3D7_0904200_e1_1130	0.0476658	conserved Plasmodium protein, unknown function
PF3D7_0507300_248	0.0476196	conserved Plasmodium protein, unknown function
PF3D7_0510400_1059	0.0476176	conserved Plasmodium protein, unknown function
PF3D7_1213400_e1s1_514	0.0476096	conserved Plasmodium protein, unknown function
PF3D7_1329700_774	0.0474544	conserved Plasmodium protein, unknown function
PF3D7_1444100_e7s1_426	0.0474007	conserved Plasmodium protein, unknown function
PF3D7_1469100_1129	0.0472765	conserved Plasmodium protein, unknown function
PF3D7_1420200_166	0.0472119	tetratricopeptide repeat family protein, putative
PF3D7_1205200_264	0.0471903	conserved Plasmodium protein, unknown function
PF3D7_1206900_e4_1075	0.0470286	conserved Plasmodium protein, unknown function
PF3D7_1138400_e1s4_615	0.0468185	guanylyl cyclase (GCalpha)
PF3D7_1325900_e1s1_709	0.0467398	conserved Plasmodium protein, unknown function
PF3D7_1023100_e1s2_542	0.0466565	dynein heavy chain, putative
PF3D7_0310300_e1s1_608	0.0465681	phosphoglycerate mutase, putative
PF3D7_1447800_e1s2_535	0.0464742	conserved Plasmodium protein, unknown function
PF3D7_0500800_e2s2_120	0.0463743	mature parasite-infected erythrocyte surface antigen,erythrocyte membrane protein 2 (MESA)
PF3D7_1040800_e2s1_144	0.0463743	rifin (RIF)
PF3D7_0410900_288	0.0462676	conserved Plasmodium protein, unknown function
PF3D7_0318900_e3_490	0.0462676	conserved protein, unknown function
PF3D7_1319900_s2_180	0.0461537	conserved Plasmodium protein, unknown function
PF3D7_1133100_e1s2_466	0.0461537	conserved membrane protein, unknown function
PF3D7_1200300_e2s1_604	0.0461537	rifin (RIF)
PF3D7_1140700_e1s3_996	0.0461537	conserved Plasmodium protein, unknown function
PF3D7_1446700_e1_103	0.0460316	conserved Plasmodium protein, unknown function
PF3D7_0617400_e1s3_930	0.0460316	erythrocyte membrane protein 1, PfEMP1 (VAR)
PF3D7_1113400_e4s1_984	0.0460316	ubiquitin domain containing protein
PF3D7_0729900_e2s3_1107	0.0460316	dynein heavy chain, putative
PF3D7_0522400_e3s3_452	0.0459638	conserved Plasmodium protein, unknown function
PF3D7_1014100_s1_64	0.0459004	conserved Plasmodium protein, unknown function
PF3D7_0726400_e6s2_231	0.0459004	conserved Plasmodium membrane protein, unknown function
PF3D7_0931300_359	0.0459004	asparagine-rich antigen, putative
PF3D7_1472100_e1_558	0.0459004	Yip1 protein, putative
PF3D7_1202300_s1_798	0.0459004	dynein heavy chain, putative
PF3D7_1334800_936	0.0459004	MSP7-like protein (MSRP2)
PF3D7_0824600_e1_270	0.0457592	anamorsin related protein, putative
PF3D7_1468100_e2s2_742	0.0457592	conserved Plasmodium protein, unknown function
PF3D7_1325900_e1s2_998	0.0457592	conserved Plasmodium protein, unknown function
PF3D7_0910800_1062	0.0456067	nucleotide binding protein, putative
PF3D7_0936300_e2_71	0.0455562	ring-exported protein 3 (REX3)
PF3D7_1452000_s2_353	0.0454827	rhoptry neck protein 2 (RON2)
PF3D7_1142800_254	0.0454414	conserved Plasmodium protein, unknown function
PF3D7_1366600_1040	0.0454414	signal recognition particle receptor alpha subunit (SRPR-alpha)
PF3D7_0619000.1_e12_556	0.0453476	conserved Plasmodium protein, unknown function
PF3D7_0501800_e1s2_318	0.0453234	chromosome assembly factor 1 (CAF1)
PF3D7_1117100_195	0.0452618	deubiquinating/deneddylating enzyme (UCH54)
PF3D7_0425800_CIDR1_574	0.0452618	erythrocyte membrane protein 1, PfEMP1 (VAR)
PF3D7_1466300_e1s1_55	0.0452054	26S proteasome regulatory subunit, putative
PF3D7_1226900_e1s1_1011	0.0452054	conserved Plasmodium protein, unknown function
PF3D7_1014600_e1s3_161	0.0451769	transcriptional coactivator ADA2 (ADA2)
PF3D7_1408700_e2s1_232	0.0450659	conserved Plasmodium protein, unknown function
PF3D7_0705000_e1s2_640	0.0450659	methyltransferase, putative
PF3D7_1201700_e2_765	0.0450659	conserved Plasmodium membrane protein, unknown function
PF3D7_0310500_e1s2_809	0.0450659	DEAD box helicase, putative
PF3D7_0406200_626	0.0450401	sexual stage-specific protein precursor (Pfs16)
PF3D7_1434600_e1s1_147	0.0446152	methionine aminopeptidase 2 (MetAP2)
PF3D7_0402400_e2_76	0.0445867	Plasmodium exported protein, unknown function (GEXP18)
PF3D7_1335600_e2_639	0.0445736	conserved Plasmodium protein, unknown function
PF3D7_1014600_e1s4_736	0.0445562	transcriptional coactivator ADA2 (ADA2)
PF3D7_1014600_e1s2_45	0.04445	transcriptional coactivator ADA2 (ADA2)
PF3D7_1024800_e2s2_620	0.04445	conserved Plasmodium protein, unknown function
PF3D7_1208800_e1s2_1093	0.0444087	zinc finger protein, putative
PF3D7_1442900_s2_636	0.0443638	guanine nucleotide exchange factor, putative
PF3D7_0414700_961	0.0443638	GTP binding protein, putative
PF3D7_1021700_e1s2_33	0.0442021	conserved Plasmodium membrane protein, unknown function
PF3D7_1419400_e1s2_899	0.0438407	conserved Plasmodium membrane protein, unknown function
PF3D7_1208800_e1s1_312	0.043789	zinc finger protein, putative
PF3D7_1475100_e1s4_461	0.043789	conserved Plasmodium protein, unknown function
PF3D7_0511400_627	0.0437404	conserved Plasmodium protein, unknown function
PF3D7_1436500_e2_756	0.0437404	conserved protein, unknown function
PF3D7_1468900_284	0.0436238	conserved Plasmodium protein, unknown function
PF3D7_0520400_e1s1_134	0.0434886	conserved Plasmodium protein, unknown function
PF3D7_0203100_e2s3_37	0.0425497	protein kinase, putative
PF3D7_0501800_e1s1_599	0.0424907	chromosome assembly factor 1 (CAF1)
PF3D7_1033700_e3s1_406	0.0424907	bromodomain protein, putative
PF3D7_0519900_487	0.0413104	conserved Plasmodium protein, unknown function
PF3D7_0420000_s3_1124	0.0413104	zinc finger protein, putative
PF3D7_1012700_e1s1_168	0.0404842	protein phosphatase, putative
PF3D7_1216500_e1s1_314	0.039658	male development gene 1 (MDV1)
PF3D7_1471100_e3s1_595	0.039658	exported protein 2 (EXP2)
PF3D7_0207600_e2s1_885	0.0392449	serine repeat antigen 5 (SERA5)
PF3D7_1346500_1066	0.0371794	conserved Plasmodium protein, unknown function
PF3D7_1435300_e1s4_1004	0.0354089	NAD(P)H-dependent glutamate synthase, putative
PF3D7_0929000_e2_350	0.0240977	conserved Plasmodium protein, unknown function
PF3D7_1432300_e2_594	0.0240977	conserved Plasmodium protein, unknown function
PF3D7_0823300_e1s1_1083	0.0240572	histone acetyltransferase GCN5 (GCN5)
PF3D7_0909500_57	0.0240351	subpellicular microtubule protein 1, putative (SPM1)
PF3D7_0103900_204	0.0240351	parasite-infected erythrocyte surface protein (PIEPS15)
PF3D7_1032900_e1s1_440	0.0240351	RNA polymerase II-associated protein 1, putative
PF3D7_1444100_e6s1_732	0.0240351	conserved Plasmodium protein, unknown function
PF3D7_1013600_s2_1054	0.0240351	conserved Plasmodium protein, unknown function
PF3D7_1022300_e2_1057	0.0240351	zinc transporter, putative
PF3D7_1116800_e4s1_155	0.0240117	heat shock protein 101 (HSP101)
PF3D7_1302600_772	0.0240117	deoxyhypusine hydroxylase (DOHH)
PF3D7_0102700_e2_848	0.0240117	merozoite-associated tryptophan-rich antigen, putative
PF3D7_0304100_1073	0.0240117	membrane skeletal protein IMC1-related (ALV2)
PF3D7_1304100_e2s1_152	0.0239867	DNA ligase I (LigI)
PF3D7_1208100_e2s1_240	0.0239867	conserved Plasmodium protein, unknown function
PF3D7_0422500_e1s3_739	0.0239867	pre-mRNA-splicing helicase BRR2, putative (BRR2)
PF3D7_0936800_e2s1_792	0.0239867	Plasmodium exported protein (PHISTc), unknown function
PF3D7_0529400.1_e5s1_991	0.0239867	conserved Plasmodium protein, unknown function
PF3D7_0921600_e1s2_1104	0.0239867	tetratricopeptide repeat family protein, putative
PF3D7_1319100_1143	0.0239867	conserved protein, unknown function
PF3D7_0502500_86	0.02396	conserved Plasmodium protein, unknown function
PF3D7_1221000_e1s3_153	0.02396	histone-lysine N-methyltransferase, H3 lysine-4 specific (SET10)
PF3D7_1228400_s1_547	0.02396	conserved Plasmodium protein, unknown function
PF3D7_1149000_e1s1_802	0.02396	antigen 332, DBL-like protein (Pf332)
PF3D7_0313000_e1_938	0.02396	conserved Plasmodium protein, unknown function
PF3D7_0207500_e3s1_987	0.02396	serine repeat antigen 6 (SERA6)
PF3D7_1212700_s1_56	0.0239315	eukaryotic translation initiation factor 3 subunit 10, putative
PF3D7_0223300_e2s1_316	0.0239315	erythrocyte membrane protein 1 (PfEMP1), truncated
PF3D7_1211200_e1s1_328	0.0239315	conserved Plasmodium protein, unknown function
PF3D7_1346400_e1s1_349	0.0239315	conserved Plasmodium protein, unknown function
PF3D7_1354900_496	0.0239315	conserved Plasmodium protein, unknown function
PF3D7_1338300_e2s1_723	0.0239315	elongation factor 1-gamma, putative
PF3D7_0907200_e1s2_734	0.0239315	GTPase activator, putative
PF3D7_0404600_s5_917	0.0239315	conserved Plasmodium membrane protein, unknown function
PF3D7_0211200_1136	0.0239315	Rab GTPase 5a (RAB5a)
PF3D7_1023200_183	0.023901	orotidine monophosphate decarboxylase (OMPDC)
PF3D7_0918900_e1s1_216	0.023901	gamma-glutamylcysteine synthetase (gammaGCS)
PF3D7_1020700_e1s2_226	0.023901	ribosomal processing ATPase, putative
PF3D7_1475400_e3s4_255	0.023901	cysteine repeat modular protein 4 (CRMP4)
PF3D7_1037600_e2s1_431	0.023901	DNA repair helicase rad25, putative
PF3D7_0301400_e2_471	0.023901	Plasmodium exported protein, unknown function
PF3D7_0200100_e1s2_623	0.023901	erythrocyte membrane protein 1, PfEMP1 (VAR)
PF3D7_1322700_761	0.023901	conserved Plasmodium protein, unknown function
PF3D7_1469600_e1s2_834	0.023901	biotin carboxylase subunit of acetyl CoA carboxylase, putative (ACC1)
PF3D7_0506800_e1_1037	0.023901	conserved Plasmodium protein, unknown function
PF3D7_0730300_e1s1_1102	0.023901	transcription factor with AP2 domain(s) (ApiAP2)
PF3D7_0902800_e2_1147	0.023901	serine repeat antigen 9 (SERA9)
PF3D7_1138400_e1s1_250	0.0238682	guanylyl cyclase (GCalpha)
PF3D7_0202200_e2_402	0.0238682	Plasmodium exported protein, unknown function
PF3D7_1035100_670	0.0238682	probable protein, unknown function
PF3D7_0713900_e1s1_1005	0.0238682	conserved Plasmodium protein, unknown function
PF3D7_0905300_s5_1038	0.0238682	dynein heavy chain, putative
PF3D7_0803800_e2s1_143	0.0238329	20S proteasome beta subunit
PF3D7_1211000_e3s1_164	0.0238329	kinesin-like protein, putative
PF3D7_0511400_361	0.0238329	conserved Plasmodium protein, unknown function
PF3D7_1350100_e2s1_423	0.0238329	lysine-tRNA ligase, putative
PF3D7_0629700_e1s7_536	0.0238329	SET domain protein, putative (SET1)
PF3D7_0520100_e1s1_719	0.0238329	protein phosphatase, putative
PF3D7_1311600_1064	0.0238329	conserved Plasmodium protein, unknown function
PF3D7_1477000_83	0.0237948	Plasmodium exported protein (hyp17), unknown function, pseudogene
PF3D7_0719400_s1_174	0.0237948	conserved Plasmodium protein, unknown function
PF3D7_0905600_e2_210	0.0237948	conserved Plasmodium protein, unknown function
PF3D7_0727700_e1s1_253	0.0237948	conserved Plasmodium protein, unknown function
PF3D7_0911900_e2_343	0.0237948	falstatin (ICP)
PF3D7_1010100_543	0.0237948	conserved Plasmodium protein, unknown function
PF3D7_0110500_e1s3_612	0.0237948	bromodomain protein, putative
PF3D7_0620600_691	0.0237948	conserved Plasmodium protein, unknown function
PF3D7_1149600_e2_775	0.0237948	DnaJ protein, putative
PF3D7_1346000_e1s1_898	0.0237948	conserved Plasmodium protein, unknown function
PF3D7_1466200_e1s2_910	0.0237948	conserved Plasmodium protein, unknown function
PF3D7_0318300_e3s1_914	0.0237948	conserved Plasmodium protein, unknown function
PF3D7_0206200_1063	0.0237948	metabolite/drug transporter, putative
PF3D7_0708000_e1s1_239	0.0237535	cytoskeleton associated protein, putative
PF3D7_1247100_e1_262	0.0237535	conserved Plasmodium protein, unknown function
PF3D7_0511600_363	0.0237535	conserved Plasmodium protein, unknown function
PF3D7_0929000_e2_369	0.0237535	conserved Plasmodium protein, unknown function
PF3D7_0214100_e1s2_465	0.0237535	protein transport protein sec31 (SEC31)
PF3D7_1306500_e3s3_540	0.0237535	MORN repeat protein, putative
PF3D7_1036300_683	0.0237535	merozoite surface protein (MSP3.8)
PF3D7_1352800_e1_684	0.0237535	vacuolar fusion protein MON1, putative
PF3D7_1216600_710	0.0237535	cell traversal protein for ookinetes and sporozoites (CelTOS)
PF3D7_0724700_e1s1_1006	0.0237535	conserved Plasmodium protein, unknown function
PF3D7_1140700_e1s2_137	0.0237086	conserved Plasmodium protein, unknown function
PF3D7_1244500_218	0.0237086	conserved Plasmodium protein, unknown function
PF3D7_0904900_e1s2_339	0.0237086	Cu2 -transporting ATPase, putative (CUP)
PF3D7_0726400_e6s1_520	0.0237086	conserved Plasmodium membrane protein, unknown function
PF3D7_1308100_557	0.0237086	CCAAT-binding transcription factor, putative
PF3D7_1022000_e2_632	0.0237086	RNA binding protein, putative
PF3D7_0503900_e2_788	0.0237086	conserved Plasmodium protein, unknown function
PF3D7_1012200_e1_943	0.0237086	conserved Plasmodium protein, unknown function
PF3D7_0607600_e1_965	0.0237086	conserved Plasmodium protein, unknown function
PF3D7_0207700_e2_966	0.0237086	serine repeat antigen 4 (SERA4)
PF3D7_1115400_e1s1_1000	0.0237086	cysteine proteinase falcipain 3
PF3D7_0522400_e3s2_1033	0.0237086	conserved Plasmodium protein, unknown function
PF3D7_0306400_e1s1_1094	0.0237086	FAD-dependent glycerol-3-phosphate dehydrogenase, putative
PF3D7_0930300_s1_51	0.0236596	merozoite surface protein 1 (MSP1)
PF3D7_0807800_e2s1_407	0.0236596	proteasome subunit alpha type 5, putative
PF3D7_0818900_635	0.0236596	heat shock protein 70 (Hsp70)
PF3D7_1036800_e5_779	0.0236596	acetyl-CoA transporter, putative
PF3D7_0506200_988	0.0236596	transcription initiation factor TFiid, TATA-binding protein (TBP)
PF3D7_1242600_e1_202	0.0236059	protein geranylgeranyltransferase type II, alpha subunit, putative
PF3D7_0804600_373	0.0236059	U2 snRNA/tRNA pseudouridine synthase, putative
PF3D7_1401100_e2s1_721	0.0236059	DnaJ protein, putative
PF3D7_1252400_e4s1_417	0.0235469	reticulocyte binding protein homologue 3, pseudogene (RH3)
PF3D7_1038400_e4s1_419	0.0235469	gametocyte-specific protein (Pf11-1)
PF3D7_1206700_486	0.0235469	eukaryotic translation initiation factor 5, putative
PF3D7_0322100_489	0.0235469	RNA triphosphatase (Prt1)
PF3D7_1023900_s1_546	0.0235469	chromodomain-helicase-DNA-binding protein 1 homolog, putative (CHD1)
PF3D7_1017100_937	0.0235469	conserved Plasmodium protein, unknown function
PF3D7_1476600_e2_629	0.0234817	Plasmodium exported protein, unknown function
PF3D7_0717500_e2s1_799	0.0234817	calcium dependent protein kinase 4 (CDPK4)
PF3D7_0828400_1072	0.0234817	mitochondrial inner membrane protein, putative (Oxa1)
PF3D7_0529400.1_e7s1_213	0.0234092	conserved Plasmodium protein, unknown function
PF3D7_1146800_e2_220	0.0234092	conserved Plasmodium protein, unknown function
PF3D7_1122900_e2s3_730	0.0233282	dynein heavy chain, putative
PF3D7_1110400_e3s1_517	0.0232371	asparagine-rich antigen
PF3D7_0306200_e5_1047	0.0232371	activator of Hsp90 ATPase (AHA1)
PF3D7_0808600_e2s1_317	0.0223076	erythrocyte membrane protein 1, PfEMP1 (VAR)
PF3D7_0424900_e2_552	0.0223076	Plasmodium exported protein (PHISTa), unknown function
PF3D7_1228400_s2_258	0.0220322	conserved Plasmodium protein, unknown function
PF3D7_1222700_399	0.021688	glideosome-associated protein 45 (GAP45)
PF3D7_0110600_e1s1_509	0.021688	phosphatidylinositol-4-phosphate 5-kinase (PIP5K)
PF3D7_1121100_e4_678	0.021688	conserved Plasmodium protein, unknown function
PF3D7_0800300_e2s1_894	0.021688	erythrocyte membrane protein 1, PfEMP1 (VAR)
PF3D7_1441300_e5s1_156	0.0212453	serine/threonine protein kinase, putative
PF3D7_1445900_e1s1_214	0.0212453	DEAD/DEAH box ATP-dependent RNA helicase, putative
PF3D7_0826100_s4_745	0.0212453	E3 ubiquitin-protein ligase, putative
PF3D7_0906500_780	0.0212453	arginase
PF3D7_1205800_e3_883	0.0212453	conserved Plasmodium protein, unknown function
PF3D7_0323800_e2s1_912	0.0212453	conserved Plasmodium protein, unknown function
PF3D7_1137600_951	0.0212453	conserved Plasmodium protein, unknown function
PF3D7_0907400_e1s1_1016	0.0212453	ATP-dependent protease ATPase subunit ClpY (ClpY)
PF3D7_1014600_e1s1_1036	0.0212453	transcriptional coactivator ADA2 (ADA2)
PF3D7_1205000_e1_1150	0.0212453	conserved Plasmodium protein, unknown function
PF3D7_0832300_e1s2_138	0.0206552	Plasmodium exported protein (PHISTa-like), unknown function
PF3D7_1022200_e2s1_142	0.0206552	conserved Plasmodium membrane protein, unknown function
PF3D7_0622800_s1_176	0.0206552	leucyl tRNA synthase
PF3D7_1401600_e3s1_215	0.0206552	Plasmodium exported protein (PHISTb), unknown function
PF3D7_0808200_e1s1_319	0.0206552	plasmepsin X
PF3D7_0725100_e1s1_323	0.0206552	conserved Plasmodium membrane protein, unknown function
PF3D7_1449000_e3_400	0.0206552	conserved Plasmodium protein, unknown function
PF3D7_1227100_e1s1_418	0.0206552	DNA helicase 60 (DH60)
PF3D7_1015600_e2s1_424	0.0206552	heat shock protein 60 (HSP60)
PF3D7_1304500_e1s1_425	0.0206552	small heat shock protein, putative
PF3D7_1025500_e2s3_442	0.0206552	conserved Plasmodium protein, unknown function
PF3D7_1208900_s1_475	0.0206552	conserved Plasmodium protein, unknown function
PF3D7_1321700_e2s1_502	0.0206552	splicing factor, putative
PF3D7_0207600_e4s1_524	0.0206552	serine repeat antigen 5 (SERA5)
PF3D7_1252100_e8s2_611	0.0206552	rhoptry neck protein 3 (RON3)
PF3D7_0925800_e1s1_748	0.0206552	conserved Plasmodium protein, unknown function
PF3D7_1448000_e2s2_886	0.0206552	U3 snoRNA-associated small subunit rRNA processing protein, putative
PF3D7_1122900_e2s5_904	0.0206552	dynein heavy chain, putative
PF3D7_1322200_e1s1_1024	0.0206552	conserved Plasmodium protein, unknown function
PF3D7_1215100_e1s1_1026	0.0206552	conserved Plasmodium protein, unknown function
PF3D7_1218900_1085	0.0206552	conserved Plasmodium protein, unknown function
PF3D7_1321900_1113	0.0206552	conserved Plasmodium protein, unknown function
PF3D7_1210100_1138	0.0206552	syntaxin, Qa-SNARE family (SYN2)
PF3D7_0629700_e1s3_348	0.019829	SET domain protein, putative (SET1)
PF3D7_0515600_e6s1_432	0.019829	conserved Plasmodium protein, unknown function
PF3D7_0819400_499	0.019829	perforin like protein 4 (PPLP4)
PF3D7_1222600_e1s1_538	0.019829	transcription factor with AP2 domain(s) (ApiAP2)
PF3D7_0202400_e1s2_601	0.019829	conserved Plasmodium protein, unknown function
PF3D7_1457300_e1s1_609	0.019829	conserved Plasmodium protein, unknown function
PF3D7_1402300_797	0.019829	26S proteasome regulatory subunit (RPN6)
PF3D7_1132400_e2s2_836	0.019829	conserved Plasmodium membrane protein, unknown function
PF3D7_1250600_924	0.019829	eukaryotic translation initiation factor 2b, subunit 2, putative
PF3D7_1435300_e1s1_1020	0.019829	NAD(P)H-dependent glutamate synthase, putative
PF3D7_1319900_s1_1035	0.019829	conserved Plasmodium protein, unknown function
PF3D7_0318200_e1s3_1116	0.019829	DNA-directed RNA polymerase II, putative
PF3D7_1445300_e1_1126	0.019829	mitochondrial ribosomal protein S29 precursor, putative
PF3D7_0308000_1140	0.019829	DNA polymerase epsilon subunit b, putative
PF3D7_1410100_e1_79	0.0185897	alpha/beta hydrolase, putative
PF3D7_1361000_572	0.0185897	arginine methyltransferase 5, putative (PRMT5)
PF3D7_0827100_s2_1042	0.0185897	translation initiation factor IF-2, putative
PF3D7_0800200_e1s3_997	0.0165242	erythrocyte membrane protein 1, PfEMP1 (VAR)
PF3D7_0108700_e1s1_29	0	secreted ookinete protein, putative (PSOP24)
PF3D7_1128300_e1s1_31	0	6-phosphofructokinase (PFK11)
PF3D7_1325900_e1s3_39	0	conserved Plasmodium protein, unknown function
PF3D7_1308400_e4s1_41	0	conserved Plasmodium protein, unknown function
PF3D7_0310500_e1s3_42	0	DEAD box helicase, putative
PF3D7_1434500_e2s4_47	0	dynein-related AAA-type ATPase, putative
PF3D7_0826100_s3_52	0	E3 ubiquitin-protein ligase, putative
PF3D7_0801800_60	0	mannose-6-phosphate isomerase, putative
PF3D7_0617400_e2_61	0	erythrocyte membrane protein 1, PfEMP1 (VAR)
PF3D7_1441800_e3_67	0	SNF7 family protein, putative
PF3D7_1023000_81	0	conserved Plasmodium membrane protein, unknown function
PF3D7_1341800_82	0	conserved Plasmodium protein, unknown function
PF3D7_0527600_e6_89	0	conserved Plasmodium protein, unknown function
PF3D7_0722800_93	0	conserved Plasmodium protein, unknown function
PF3D7_0412000_98	0	conserved Plasmodium protein, unknown function
PF3D7_1348800_e3_101	0	E1-E2 ATPase, putative
PF3D7_1221900_106	0	conserved Plasmodium membrane protein, unknown function
PF3D7_0803600._e14_108	0	NA
PF3D7_1011800_e1s2_119	0	QF122 antigen
PF3D7_1479000_123	0	acyl-CoA synthetase (ACS1a)
PF3D7_0309600_e1s1_124	0	60S acidic ribosomal protein P2, putative
PF3D7_1252400_e4s3_128	0	reticulocyte binding protein homologue 3, pseudogene (RH3)
PF3D7_1233600_e1s2_131	0	asparagine and aspartate rich protein 1 (AARP1)
PF3D7_1105800_e1s1_133	0	conserved Plasmodium protein, unknown function
PF3D7_0507700_e1s1_135	0	nuclear protein localization protein 4, putative (NPL4)
PF3D7_1471400_e2s1_136	0	diacylglycerol kinase, putative
PF3D7_1434500_e2s3_139	0	dynein-related AAA-type ATPase, putative
PF3D7_1138400_e1s3_151	0	guanylyl cyclase (GCalpha)
PF3D7_1470100_e1s3_154	0	conserved Plasmodium protein, unknown function
PF3D7_1303800_e1s1_160	0	conserved Plasmodium protein, unknown function
PF3D7_0812100_e1s1_162	0	conserved Plasmodium protein, unknown function
PF3D7_1114900_e1s1_170	0	conserved Plasmodium protein, unknown function
PF3D7_1343600_e2_178	0	UDP-N-acetylglucosamine pyrophosphorylase, putative
PF3D7_1218400_e1_184	0	triose or hexose phosphate/phosphate translocator, putative
PF3D7_1229100_s1_187	0	ABC transporter, (CT family) (MRP2)
PF3D7_1439800_e1_190	0	vesicle-associated membrane protein, putative
PF3D7_0804900_192	0	GTPase activator, putative
PF3D7_1406400_198	0	PPR repeat protein (PPR)
PF3D7_1343900_199	0	U4/U6 small nuclear ribonucleoprotein PRP4, putative (PRPF4)
PF3D7_1305100_201	0	conserved Plasmodium protein, unknown function
PF3D7_1341600_211	0	dolichyl-phosphate-mannose-glygolipidalpha-mannosyltransferase, putative (Alg9)
PF3D7_0619000.1_e2_212	0	conserved Plasmodium protein, unknown function
PF3D7_1010600_e1s1_221	0	eukaryotic translation initiation factor 2 beta subunit, putative
PF3D7_1464700_e1s1_222	0	ATP synthase (C/AC39) subunit, putative
PF3D7_0709100_e1s2_227	0	Cg1 protein
PF3D7_1005500_e2s2_228	0	regulator of nonsense transcripts, putative
PF3D7_0806600_e5s1_233	0	kinesin-like protein, putative
PF3D7_1422700_e1s1_234	0	conserved Plasmodium protein, unknown function
PF3D7_1123100_e2s1_238	0	calcium-dependent protein kinase 7 (CDPK7)
PF3D7_0318200_e1s1_242	0	DNA-directed RNA polymerase II, putative
PF3D7_1457900_e1s2_251	0	conserved Plasmodium protein, unknown function
PF3D7_0728000_e2_260	0	eukaryotic translation initiation factor 2 alpha subunit, putative
PF3D7_1018100_263	0	conserved Plasmodium protein, unknown function
PF3D7_1134500_s1_265	0	alpha/beta hydrolase, putative
PF3D7_0511200_e1_266	0	stearoyl-CoA delta 9 desaturase, putative
PF3D7_1004100_e8_267	0	hypothetical protein
PF3D7_1213500_e1_275	0	conserved Plasmodium membrane protein, unknown function
PF3D7_0204000_e1_276	0	conserved Plasmodium protein, unknown function
PF3D7_0300100_CIDR1_286	0	erythrocyte membrane protein 1, PfEMP1 (VAR)
PF3D7_1334200_e1s1_310	0	chaperone binding protein, putative
PF3D7_1114900_e1s2_326	0	conserved Plasmodium protein, unknown function
PF3D7_0731600_e1s1_332	0	acyl-coA synthetase, PfACS5 (ACS5)
PF3D7_1239700_e1s1_334	0	cell division protein FtsH, putative
PF3D7_0709900_e2_340	0	conserved Plasmodium membrane protein, unknown function
PF3D7_1036400_e1_344	0	liver stage antigen 1 (LSA1)
PF3D7_0731500_e1s2_345	0	erythrocyte binding antigen-175 (EBA175)
PF3D7_1133400_346	0	apical membrane antigen 1 (AMA1)
PF3D7_1134500_s2_347	0	alpha/beta hydrolase, putative
PF3D7_0108300_s2_354	0	conserved Plasmodium protein, unknown function
PF3D7_1473000_355	0	conserved Plasmodium protein, unknown function
PF3D7_0936600_e2_366	0	Plasmodium exported protein (PHISTb), unknown function (GEXP05)
PF3D7_1308200_e2s1_368	0	carbamoyl phosphate synthetase (cpsSII)
PF3D7_0911900_e2_370	0	falstatin (ICP)
PF3D7_1300300_e2_371	0	erythrocyte membrane protein 1, PfEMP1 (VAR)
PF3D7_0717200_e1_378	0	conserved Plasmodium protein, unknown function
PF3D7_1035800_386	0	probable protein, unknown function
PF3D7_0630600_e2_388	0	conserved Plasmodium protein, unknown function
PF3D7_1335900_390	0	sporozoite surface protein 2 (TRAP)
PF3D7_1446700_e1_391	0	conserved Plasmodium protein, unknown function
PF3D7_0827600_e2_397	0	conserved Plasmodium protein, unknown function
PF3D7_1227700_e1_404	0	conserved Plasmodium protein, unknown function
PF3D7_1038400_e2s1_416	0	gametocyte-specific protein (Pf11-1)
PF3D7_1329000_e1s2_420	0	DNA-directed RNA polymerase 3 largest subunit
PF3D7_1115700_e1s1_422	0	cysteine proteinase falcipain 2a
PF3D7_1414600_e1s1_433	0	RNA guanylyltransferase (Pgt1)
PF3D7_1339600_e1s1_435	0	conserved Plasmodium protein, unknown function
PF3D7_1121700_e1s1_446	0	protein GCN20 (GCN20)
PF3D7_0812100_e1s2_448	0	conserved Plasmodium protein, unknown function
PF3D7_0317300_s3_454	0	conserved Plasmodium protein, unknown function
PF3D7_1136300_e2s1_457	0	tudor staphylococcal nuclease (TSN)
PF3D7_0522400_e4s2_462	0	conserved Plasmodium protein, unknown function
PF3D7_1302200_463	0	early transcribed membrane protein 13 (ETRAMP13)
PF3D7_1448600_470	0	SNARE protein, putative (VTI1)
PF3D7_0425100_e2_472	0	Plasmodium exported protein (hyp6), unknown function
PF3D7_1365700_e1_480	0	conserved Plasmodium membrane protein, unknown function
PF3D7_0904000_484	0	GTPase activator, putative
PF3D7_0216900_488	0	conserved Plasmodium protein, unknown function
PF3D7_1124500_495	0	pyruvate dehydrogenase E1 alpha subunit (pdhA)
PF3D7_0113300_e2_498	0	Plasmodium exported protein (hyp1), unknown function
PF3D7_1252400_e2s1_504	0	reticulocyte binding protein homologue 3, pseudogene (RH3)
PF3D7_1337300_e1_507	0	exoribonuclease, putative
PF3D7_1432900_e1s1_510	0	SF-assemblin, putative
PF3D7_0916700_e1s1_511	0	RNA-binding protein musashi, putative (HoMu)
PF3D7_0407700_e2s1_519	0	conserved Plasmodium protein, unknown function
PF3D7_1004200_e1s1_521	0	conserved Plasmodium membrane protein, unknown function
PF3D7_1405400_e1s1_533	0	DNA mismatch repair protein, putative
PF3D7_1208200_e3s2_539	0	cysteine repeat modular protein 3 (CRMP3)
PF3D7_1001100.1_550	0	acyl-CoA binding protein, isoform 1, ACBP1 (ACBP1)
PF3D7_0714400_e1_551	0	calmodulin, putative
PF3D7_1449900_553	0	conserved Plasmodium protein, unknown function
PF3D7_1041300_CIDR1_567	0	erythrocyte membrane protein 1, PfEMP1 (VAR)
PF3D7_1100100_DBL2_568	0	erythrocyte membrane protein 1, PfEMP1 (VAR)
PF3D7_0410300_e1_569	0	protein phosphatase, putative
PF3D7_0932500_CIDR1_575	0	DHHC-type zinc finger protein, putative
PF3D7_1031400.1_e8_577	0	OTU-like cysteine protease, putative
PF3D7_0800200_e2s1_597	0	erythrocyte membrane protein 1, PfEMP1 (VAR)
PF3D7_0826500_e1s2_602	0	ubiquitination-mediated degradation component, putative
PF3D7_0420700_e2s1_605	0	erythrocyte membrane protein 1, PfEMP1 (VAR)
PF3D7_1417200_e1s4_616	0	NOT family protein, putative
PF3D7_0701900_e2s1_617	0	Plasmodium exported protein, unknown function
PF3D7_1239800_s5_630	0	conserved Plasmodium protein, unknown function
PF3D7_0702300_e2_633	0	sporozoite threonine and asparagine-rich protein (STARP)
PF3D7_1121800_s1_641	0	petidase, M16 family
PF3D7_0731200_e2_648	0	Plasmodium exported protein, unknown function
PF3D7_1212400_649	0	tetratricopeptide repeat family protein, putative
PF3D7_0831400_e2_655	0	Plasmodium exported protein, unknown function
PF3D7_1206900_664	0	conserved Plasmodium protein, unknown function
PF3D7_0812000_e1_668	0	conserved Plasmodium protein, unknown function
PF3D7_1340900_e1_674	0	sodium-dependent phosphate transporter (PiT)
PF3D7_1459000_675	0	ATP-dependent RNA helicase DBP5 (DBP5)
PF3D7_0501400_e1_686	0	interspersed repeat antigen (FIRA)
PF3D7_1030400_e2_690	0	conserved Plasmodium protein, unknown function
PF3D7_0403700_e5_693	0	CGI-201 protein, short form
PF3D7_0523000_e1s2_698	0	multidrug resistance protein (MDR1)
PF3D7_1467200_700	0	conserved Plasmodium protein, unknown function
PF3D7_1020200_e3s1_704	0	kinesin, putative
PF3D7_1465800_e5s4_708	0	dynein beta chain, putative
PF3D7_1021900_e1s2_715	0	conserved Plasmodium protein (10b antigen), unknown function
PF3D7_0826100_s7_718	0	E3 ubiquitin-protein ligase, putative
PF3D7_0726400_e5s1_720	0	conserved Plasmodium membrane protein, unknown function
PF3D7_1451900_e1s2_722	0	small subunit rRNA processing factor, putative
PF3D7_0322300_727	0	acyl CoA:diacylglycerol acyltransferase, putative
PF3D7_1103800_e1s1_728	0	CCR4-NOT transcription complex subunit 1, putative (NOT1)
PF3D7_1129600_e1s2_731	0	phosphatidylinositol-4-phosphate-5-kinase, putative
PF3D7_1364200_e1s1_737	0	conserved Plasmodium protein, unknown function
PF3D7_1228800_e1s1_738	0	conserved Plasmodium protein, unknown function
PF3D7_0509400_e1s3_743	0	RNA polymerase I (RNAPI)
PF3D7_1223600_e2s1_746	0	conserved Plasmodium protein, unknown function
PF3D7_0910500_e1s2_747	0	DNA repair protein REV1, putative
PF3D7_1475400_e3s3_749	0	cysteine repeat modular protein 4 (CRMP4)
PF3D7_1353400_750	0	Ran-binding protein, putative
PF3D7_1433400_e2s3_752	0	conserved Plasmodium membrane protein, unknown function
PF3D7_0505500_e1s1_753	0	DNA repair protein, putative
PF3D7_0804500_e2s2_757	0	conserved Plasmodium membrane protein, unknown function
PF3D7_1465300_e1_758	0	tRNA 3???-trailer sequence RNase, putative
PF3D7_1448700_759	0	conserved Plasmodium protein, unknown function
PF3D7_1224500_e2_767	0	chromatin assembly protein (ASF1), putative
PF3D7_1302200_768	0	early transcribed membrane protein 13 (ETRAMP13)
PF3D7_0623400_769	0	RNA-binding protein mei2 homologue, putative
PF3D7_0301900_770	0	conserved Plasmodium protein, unknown function
PF3D7_0104800_783	0	novel putative transporter 1 (NPT1)
PF3D7_0305600_786	0	AP endonuclease (DNA-[apurinic or apyrimidinic site] lyase), putative
PF3D7_0920700_787	0	conserved Plasmodium protein, unknown function
PF3D7_0528200_e2s1_793	0	eukaryotic translation initiation factor 3, subunit 6, putative
PF3D7_1139500.1_e1s1_800	0	AAA family ATPase, putative
PF3D7_0934000_e1s1_805	0	histidyl-tRNA synthetase, putative
PF3D7_0715200_e1s1_808	0	conserved Plasmodium protein, unknown function
PF3D7_0826500_e1s1_813	0	ubiquitination-mediated degradation component, putative
PF3D7_1019000_e1s1_818	0	eukaryotic translation initiation factor subunit eIF2A, putative
PF3D7_0515000_e1s1_820	0	RNA recognition motif, putative
PF3D7_0317700_e1s2_821	0	CPSF (cleavage and polyadenylation specific factor), subunit A, putative
PF3D7_1208200_e3s3_828	0	cysteine repeat modular protein 3 (CRMP3)
PF3D7_0522400_e4s1_833	0	conserved Plasmodium protein, unknown function
PF3D7_1346900_840	0	conserved Plasmodium protein, unknown function
PF3D7_0214100_e1s1_843	0	protein transport protein sec31 (SEC31)
PF3D7_1214100_e2_845	0	phosphatidylinositol-glycan biosynthesis class O protein, putative
PF3D7_0802400_e1_853	0	conserved Plasmodium protein, unknown function
PF3D7_0726100_e2_854	0	Plasmodium exported protein, unknown function
PF3D7_0910700_859	0	actin-like protein, putative
PF3D7_1003800_e1s2_890	0	U5 small nuclear ribonuclear protein, putative
PF3D7_1462300_e1s1_891	0	conserved Plasmodium protein, unknown function
PF3D7_1473100_e2s1_892	0	GTPase activator, putative
PF3D7_1007700_e1s2_903	0	transcription factor with AP2 domain(s) (ApiAP2)
PF3D7_1134700_e2s2_921	0	DNA-directed RNA polymerase 1, subunit 2, putative
PF3D7_1014100_s2_923	0	conserved Plasmodium protein, unknown function
PF3D7_0930300_s2_925	0	merozoite surface protein 1 (MSP1)
PF3D7_1346400_e1s3_927	0	conserved Plasmodium protein, unknown function
PF3D7_0319700_e1s1_947	0	ABC transporter, putative
PF3D7_1002000_e2_949	0	Plasmodium exported protein (hyp2), unknown function
PF3D7_1201500_950	0	XPA binding protein 1, putative
PF3D7_0906200_952	0	conserved Plasmodium protein, unknown function
PF3D7_0403600_e2_954	0	conserved Plasmodium protein, unknown function
PF3D7_0701000_968	0	erythrocyte membrane protein 1 (PfEMP1), pseudogene
PF3D7_0706100_e3_974	0	conserved Plasmodium protein, unknown function
PF3D7_0103500_e2_975	0	conserved Plasmodium protein, unknown function
PF3D7_1244600_e1s1_992	0	ADP-ribosylation factor GTPase-activating protein, putative
PF3D7_1115300_e1s1_1001	0	cysteine proteinase falcipain 2b (FP2B)
PF3D7_1435700.1_e1s1_1002	0	ataxin-2 like protein, putative
PF3D7_1420700_e2_1007	0	surface protein, Pf113 (Pf113)
PF3D7_0912900_e2s1_1008	0	26S proteasome regulatory subunit, putative
PF3D7_1126000_e1s2_1009	0	threonyl-tRNA synthetase,Threonine--tRNA ligase (ThrRS)
PF3D7_0819800_e4s1_1010	0	conserved Plasmodium protein, unknown function
PF3D7_0918900_e1s2_1013	0	gamma-glutamylcysteine synthetase (gammaGCS)
PF3D7_0521700_e1s1_1018	0	DEAD/DEAH box ATP-dependent RNA helicase, putative
PF3D7_1417200_e1s3_1019	0	NOT family protein, putative
PF3D7_1221000_e1s2_1021	0	histone-lysine N-methyltransferase, H3 lysine-4 specific (SET10)
PF3D7_1420400_e1s1_1027	0	glycyl-tRNA synthetase,glycine--tRNA ligase (GlyRS)
PF3D7_1433400_e2s5_1032	0	conserved Plasmodium membrane protein, unknown function
PF3D7_0728100_s6_1034	0	conserved Plasmodium membrane protein, unknown function
PF3D7_0804500_e1s1_1039	0	conserved Plasmodium membrane protein, unknown function
PF3D7_0826100_s9_1041	0	E3 ubiquitin-protein ligase, putative
PF3D7_1104200_e1s2_1043	0	chromatin remodeling protein (SNF2L)
PF3D7_1114700_e1_1044	0	serine/threonine protein kinase, putative (CLK3)
PF3D7_0620200_1049	0	conserved Plasmodium protein, unknown function
PF3D7_0829000_e2s1_1052	0	conserved Plasmodium membrane protein, unknown function
PF3D7_1140100_e2_1055	0	vacuolar ATP synthase subunit f, putative
PF3D7_0830300_1058	0	conserved Plasmodium protein, unknown function
PF3D7_1030200_1070	0	conserved Plasmodium protein, unknown function
PF3D7_1124300_e1_1071	0	conserved Plasmodium protein, unknown function
PF3D7_0521400_1074	0	conserved Plasmodium protein, unknown function
PF3D7_1332600_1076	0	apurinic/apyrimidinic endonuclease Apn1, putative (APN1)
PF3D7_0408500_1077	0	flap endonuclease 1 (FEN1)
PF3D7_0104100_e2_1078	0	conserved Plasmodium membrane protein, unknown function
PF3D7_0820900_e1_1079	0	conserved Plasmodium protein, unknown function
PF3D7_1139300_e1s1_1081	0	transcription factor with AP2 domain(s) (ApiAP2)
PF3D7_0813500_e1s1_1082	0	conserved Plasmodium protein, unknown function
PF3D7_0317100_e2_1086	0	conserved Plasmodium protein, unknown function
PF3D7_0509700_e6s1_1087	0	conserved Plasmodium protein, unknown function
PF3D7_0525800_e1s1_1088	0	membrane skeletal protein IMC1-related
PF3D7_1329000_e2s1_1089	0	DNA-directed RNA polymerase 3 largest subunit
PF3D7_0717700_e1s1_1090	0	seryl-tRNA synthetase, putative
PF3D7_1462300_e1s2_1095	0	conserved Plasmodium protein, unknown function
PF3D7_0111000_e1s2_1097	0	kinesin, putative
PF3D7_0310500_e1s1_1098	0	DEAD box helicase, putative
PF3D7_0703500_e2s2_1103	0	erythrocyte membrane-associated antigen
PF3D7_1408700_e2s2_1106	0	conserved Plasmodium protein, unknown function
PF3D7_1008100_s4_1114	0	conserved Plasmodium protein, unknown function
PF3D7_1222400_e1s2_1117	0	transcription factor with AP2 domain(s) (ApiAP2)
PF3D7_1205500_e1s1_1118	0	zinc finger protein, putative
PF3D7_0905300_s2_1122	0	dynein heavy chain, putative
PF3D7_0709900_e3_1125	0	conserved Plasmodium membrane protein, unknown function
PF3D7_0222900_1127	0	erythrocyte membrane protein 1 (PfEMP1), exon2, pseudogene (VAR)
PF3D7_0935800_e1_1134	0	cytoadherence linked asexual protein 9 (CLAG9)
PF3D7_0924700_1141	0	splicing factor 3A subunit 3, putative (SF3A3)
PF3D7_1128500_1142	0	conserved protein, unknown function
PF3D7_0425800_DBL4_1145	0	erythrocyte membrane protein 1, PfEMP1 (VAR)
PF3D7_1209900_1151	0	ABC transporter, (TAP family), putative
PF3D7_1150400_DBL2bc2_1153	0	erythrocyte membrane protein 1, PfEMP1 (VAR)
