# Supplementary material for: Age-dependent antibody profiles to plasmodium antigens are differentially associated with two artemisinin combination therapy outcomes in high transmission setting
Source: PubMed Central journal article supplement (PMC9606348; doi:10.3389/fmed.2022.991807), 2022-10-13
Supplement: Table_1.pdf [file Table_1.pdf]

**Supplementary Table 1:** Baseline characteristics of cohort I (ASMQ and AL-I) and cohort II (DP and AL-II) study participants

|                                                                | AL - I<br>N=59        | ASMQ<br>N=59          | AL - II<br>N=62       | DP<br>N=56            | Overall<br>N=236      |
|----------------------------------------------------------------|-----------------------|-----------------------|-----------------------|-----------------------|-----------------------|
| Age – mean years (SD)                                          | 6.7 (7.1)             | 8.9 (10.1)            | 7.0(3.8)              | 7.3 (3.6)             | 7.5 (6.7)             |
| Age – median years (range)                                     | 5 (1 – 50)            | 6 (1 – 51)            | 6 (1 – 22)            | 7 (2 – 19)            | 6 (1 – 51)            |
| Sex – female N(%)                                              | 34 (57.6%)            | 35 (59.3%)            | 31 (50%)              | 27 (48.2%)            | 127 (53.8%)           |
| Mean weight kg (SD)                                            | 24.0 (15.7)           | 25.0 (15.1)           | 22.2 (10.0)           | 22.1 (8.7)            | 23.3 (12.7)           |
| Weight range                                                   | 10.6 – 90.4           | 11.0 – 76.6           | 11.0 – 69.4           | 11.4 – 64.2           | 10.6 – 90.4           |
| Temperature – mean °C (range)                                  | 38.0 (36.0 – 40.1)    | 37.5 (36.1 – 40.0)    | 37.7 (36.0 – 40.1)    | 37.5 (35.9 – 39.6)    | 37.7 (35.9 – 40.1)    |
| Mean Hb g/dl (range)                                           | 10.6 (7.0 – 15.1)     | 10.8 (7.2 – 15.8)     | 11.0 (6.8 – 15.3)     | 11.0 (6.8 – 15.3)     | 10.9 (6.6 – 15.8)     |
| Asexual Parasite density – geometric mean per $\mu$ L (95% CI) | 38759 (26194 – 57351) | 32789 (21907 – 49078) | 36928 (25438 – 53607) | 38652 (24505 – 60964) | 36709 (30080 – 44799) |
| Gametocyte carriage N(%)                                       | 51(86.4%)             | 52 (88.1%)            | 46 (74.2%)            | 49 (87.5%)            | 198 (83.9%)           |
