# Supplementary material for: Age-dependent antibody profiles to plasmodium antigens are differentially associated with two artemisinin combination therapy outcomes in high transmission setting
Source: PubMed Central journal article supplement (PMC9606348; doi:10.3389/fmed.2022.991807), 2022-10-13
Supplement: Table_4.pdf [file Table_4.pdf]

**Supplementary Table 4:** Adverse events.

|                                    | ASMQ          | AL            | DP            | AL            |
|------------------------------------|---------------|---------------|---------------|---------------|
| <b>Number of patients</b>          | <b>n = 59</b> | <b>n = 59</b> | <b>n = 62</b> | <b>n = 56</b> |
| <b>Anemia</b>                      | 15(25.4%)     | 9(15.3%)      | 7(11.3%)      | 10(17.9%)     |
| <b>Diarrhea</b>                    | 0             | 0             | 1(1.6%)       | 0             |
| <b>Abdominal pain</b>              | 1(1.7%)       | 0             | 1(1.6%)       | 0             |
| <b>Gastroenteritis</b>             | 1(1.7%)       | 0             | 2(3.2%)       | 0             |
| <b>Tinea capitis</b>               | 5(8.5%)       | 3(5.1%)       | 4(6.5%)       | 4(7.1%)       |
| <b>Respiratory tract infection</b> | 3(5.1%)       | 15(25.4%)     | 12(19.4%)     | 9(16.1%)      |
| <b>Rash</b>                        | 2(3.4%)       | 1(1.7%)       | 0             | 3(5.4%)       |
| <b>Dizziness</b>                   | 1(1.7%)       | 0             | 0             | 0             |
| <b>Fatigue</b>                     | 0             | 1(1.7%)       | 0             | 0             |
| <b>Headache</b>                    | 1(1.7%)       | 1(1.7%)       | 5(8.1%)       | 1(1.8%)       |
| <b>Fever</b>                       | 0             | 0             | 1(1.6%)       | 0             |
| <b>Nausea</b>                      | 1(1.7%)       | 0             | 0             | 0             |

Some of the adverse events that occurred in study participants. None of the study participant vomited, all adverse events were mild, at low frequency and resolve spontaneously.
