# Supplementary material for: Age-dependent antibody profiles to plasmodium antigens are differentially associated with two artemisinin combination therapy outcomes in high transmission setting
Source: PubMed Central journal article supplement (PMC9606348; doi:10.3389/fmed.2022.991807), 2022-10-13
Supplement: Table_5.pdf [file Table_5.pdf]

**Supplementary Table 5:** Percentage of *P falciparum* protein features with mass

spectrometry evidence for expression during each of the various parasite lifecycle stages.

| Parasite Stage | Percent of <i>P falciparum</i> proteins targeted by 277 selected Ab immune responses, Day 28 (p-value) | Percent of <i>P falciparum</i> proteins targeted by 10 selected Ab immune responses, Day 42 (p-value) | Percent of 1,087 <i>P falciparum</i> proteins on microarrays |
|----------------|--------------------------------------------------------------------------------------------------------|-------------------------------------------------------------------------------------------------------|--------------------------------------------------------------|
| Liver          | 14.9 (0.13)                                                                                            | 10.0 (0.63)                                                                                           | 12.8                                                         |
| Sporozoites    | 43.5 (0.03)                                                                                            | 30.0 (0.42)                                                                                           | 38.6                                                         |
| Merozoites     | 26.1 (0.41)                                                                                            | 30.0 (0.53)                                                                                           | 26.8                                                         |
| Trophozoites   | 31.2 (0.48)                                                                                            | 60.0 (0.05)                                                                                           | 30.8                                                         |
| Gametocytes    | 37.7 (0.16)                                                                                            | 30.0 (0.51)                                                                                           | 35.1                                                         |
